# Supplementary material
Source: publisher figshare collection journal article supplement (https://acs.figshare.com/ndownloader/files/23991118)
Supplement: Supplementary file 1 [file 23991118]

## Supporting Information

### **Beta-Hydroxy- and beta-aminophosphonate acyclonucleosides as potent inhibitors of *Plasmodium falciparum* growth**

Thomas Cheviet, Sharon Wein, Gabriel Bourchenin, Manon Lagacherie, Christian Périgaud, Rachel Cerdan\* and Suzanne Peyrottes\*

#### **Table of Contents**

|                                                                                                 |                |
|-------------------------------------------------------------------------------------------------|----------------|
| Preparation of NMR samples                                                                      | page S2        |
| Optimization of the stereo-discrimination by using $^{31}\text{P}$ NMR (Fig. S1-3)              | pages S2 – S3  |
| Synthetic pathway for compound <b>11b</b>                                                       | pages S4 – S5  |
| Spectra for final compounds ( <b>1-10</b> , <b>11a-b</b> , and <b>12-13</b> )                   | pages S6 – S53 |
| Copies of $^1\text{H}$ NMR, $^{13}\text{C}$ NMR, $^{31}\text{P}$ NMR, ESI-MS or HR-MS, and HPLC |                |

### Preparation of NMR samples.

10mM of the studied compound were dissolved in 100mM  $\alpha$ -cyclodextrin solution in D<sub>2</sub>O (ratio substrate/CSA was 1/10). NMR spectra were recorded at different temperatures ranging from 15 to 75°C. Small amount of NaOD or DCl were used to reach the pD of interest.

**Figure S1.**  $^{31}\text{P}$   $\delta$  variation of racemic mixture of  $\beta$ -hydroxyphosphonates according to the temperature of analysis, at pD 11.7. Separation of enantiomers were visible at 25°C and 15°C, the best separation was observed for 15°C.

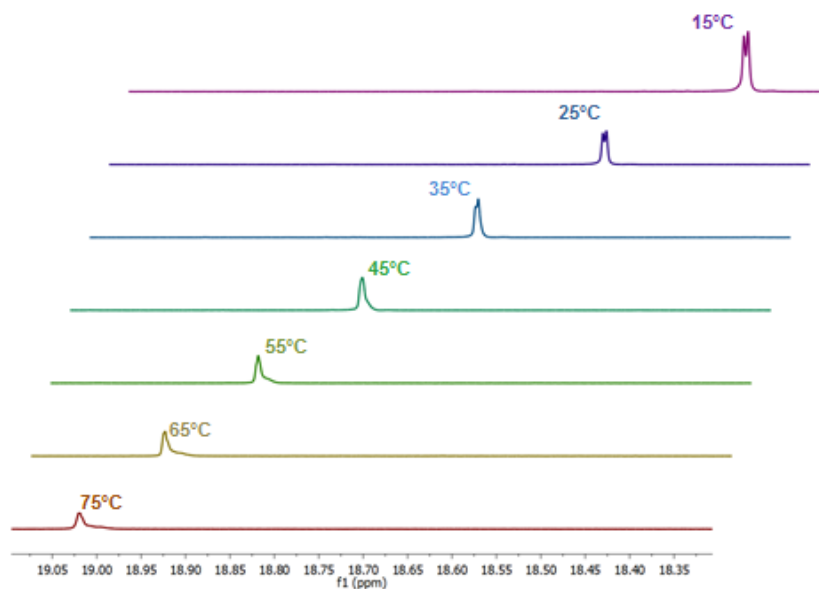

**Figure S2.**  $^{31}\text{P}$   $\delta$  variation of racemic mixture of  $\beta$ -hydroxyphosphonates according to pD value, at 15°C. Separation of enantiomers was observed at pD 11.75, but not at higher or lower pD.

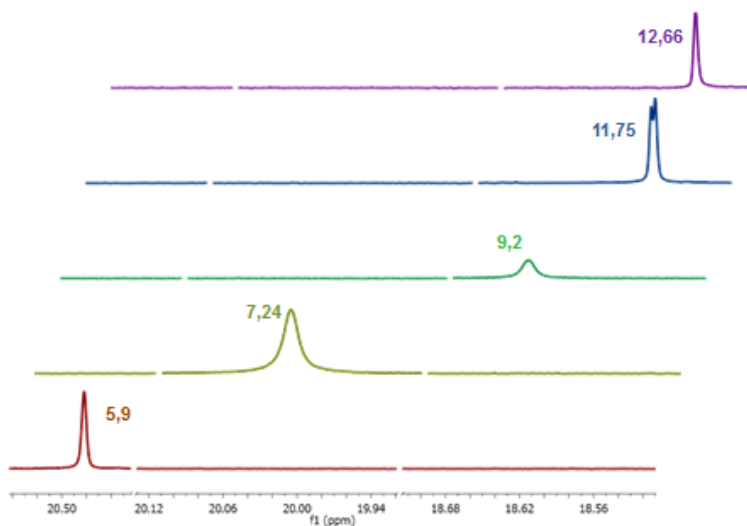

**Figure S3.**  $^{31}\text{P}$   $\delta$  variation of racemic mixture of  $\beta$ -aminophosphonates according to pD value, at 15°C. Separation of the two isomers are visible at pD 10.8 but the best result was observed at pD 12.3.

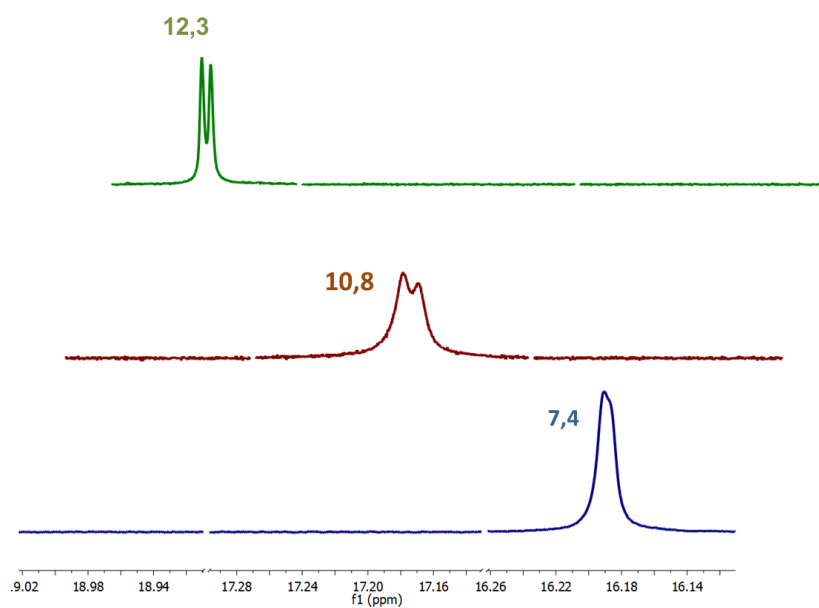

## Synthetic pathway for compound 11b

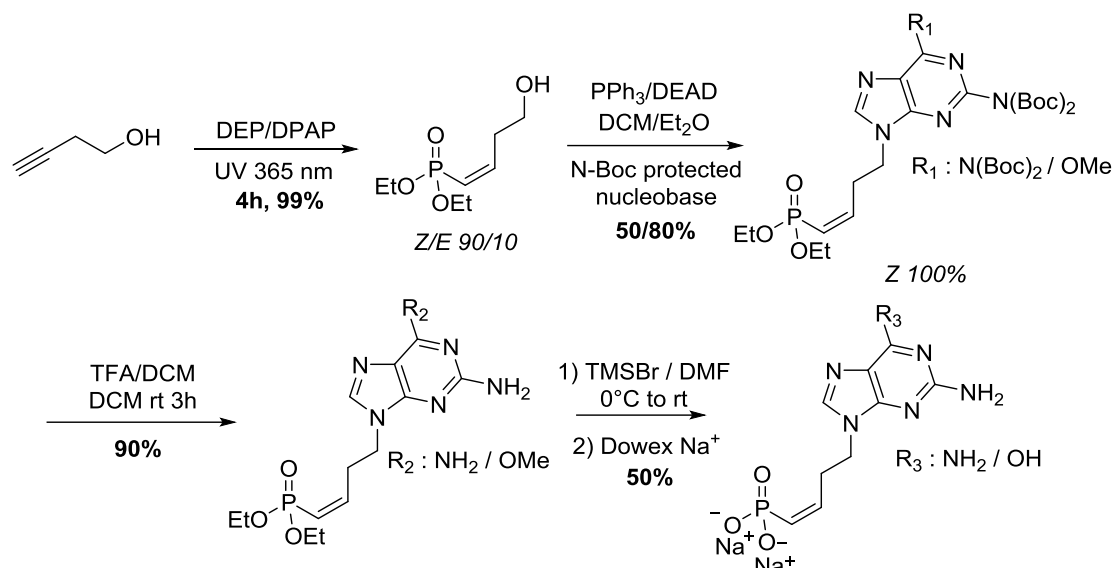

### Diethyl-(4-hydroxy)-but-1-en-1-yl-phosphonate.

3-Butyn-1-ol (20 mg) was dissolved in a glass vial (diameter : 1 cm, thickness : 0.65 mm) with diethylphosphite (100 eq). Then, 2,2-dimethoxy-2-phenylacetophenone (DPAP, 0.5 eq) was added and the reaction mixture was stirred under UV activation (UV-A lamp,  $\lambda_{\text{max}}$  = 365 nm, 4 x 15W tubes; vial located 2.5 cm away from the lamp) for 30 min. The reaction mixture was diluted in ethyl acetate and the resulting solution was washed with aqueous saturated NaHCO<sub>3</sub>. The organic layer was dried over MgSO<sub>4</sub> and concentrated in vacuo. The crude was purified by flash chromatography on silica gel (CH<sub>2</sub>Cl<sub>2</sub>/MeOH gradient) to obtain the desired compound (59 mg) in quantitative yield and as a 9:1 mixture of Z:E isomers. <sup>1</sup>H NMR (500 MHz, CDCl<sub>3</sub>)  $\delta$  6.78 (ddt,  $J$  = 22.0, 17.2, 6.8 Hz, 1H, CHCH<sub>2</sub>, *E*-isomer), 6.61 (ddt,  $J$  = 52.8, 13.0, 8.2 Hz, 1H, CHCH<sub>2</sub>, *Z*-isomer), 5.75 (ddt,  $J$  = 19.0, 13.0, 1.2 Hz, 1H, CHP, *Z*-isomer), 4.24 – 3.96 (m, 4H, OCH<sub>2</sub>CH<sub>3</sub>), 3.74 (t,  $J$  = 5.9 Hz, 2H, CH<sub>2</sub>OH), 2.79 (ddd,  $J$  = 12.0, 5.6, 1.9 Hz, 2H, CH<sub>2</sub>CH), 1.33 (t,  $J$  = 7.1 Hz, 6H, CH<sub>3</sub>CH<sub>2</sub>). <sup>13</sup>C NMR (126 MHz, CDCl<sub>3</sub>)  $\delta$  150.7 (d,  $J$  = 4.4 Hz, CHCH<sub>2</sub>), 119.3 (d,  $J$  = 182.2 Hz, CHP), 61.9 (d,  $J$  = 5.6 Hz, CH<sub>2</sub>CH<sub>3</sub>), 60.9 (d,  $J$  = 2.2 Hz, CH<sub>2</sub>OH), 33.9 (d,  $J$  = 8.5 Hz, CH<sub>2</sub>CH), 16.5 (CH<sub>3</sub>CH<sub>2</sub>). <sup>31</sup>P NMR (202 MHz, CDCl<sub>3</sub>)  $\delta$  18.1 (s, *E*-isomer), 17.8 (s, *Z*-isomer). HMRS TOF ESI<sup>+</sup> Found : 209.0943; Calculated for C<sub>8</sub>H<sub>18</sub>O<sub>4</sub>P : 209.0943 (M+H)<sup>+</sup>.

### Diethyl-(Z)-(4-(2-(bis(*tert*-butoxycarbonyl)amino)-6-methoxy-9*H*-purin-9-yl)-but-1-en-1-yl) phosphonate

Diethyl-(4-hydroxy)-but-1-en-1-yl-phosphonate (300 mg, 1 eq.) was dissolved in anhydrous CH<sub>2</sub>Cl<sub>2</sub>/Et<sub>2</sub>O (2/1, v/v) at 25°C. The nucleobase (1.5 eq.) was added, then triphenylphosphine (PPh<sub>3</sub>, 1.6 eq.) and diethylazodicarboxylate (DEAD, 1.6 eq.) dropwise. The reaction mixture was stirred for 24 hours and reaction progress was monitored by TLC (CH<sub>2</sub>Cl<sub>2</sub>/MeOH 95/5 v/v). The reaction mixture was concentrated in vacuo and purified by flash chromatography on silica gel (CH<sub>2</sub>Cl<sub>2</sub>/MeOH gradient), which allowed to separate *Z* and *E*-isomers. The title compound (440 mg) was obtained in 55% yield. <sup>1</sup>H NMR (500 MHz, CDCl<sub>3</sub>)  $\delta$  8.04 (s, 1H, H-8), 6.41 (ddt,  $J$  = 51.6, 13.0, 7.6 Hz, 1H, CHCH<sub>2</sub>), 5.69 (ddt,  $J$  = 17.8, 13.0, 1.4 Hz, 1H, CHP), 4.37 (t,  $J$  = 7.0 Hz, 2H, CH<sub>2</sub>N), 4.14 (s, 3H, OCH<sub>3</sub>), 4.09 – 3.97 (m, 4H, OCH<sub>2</sub>CH<sub>3</sub>), 3.30 – 3.09 (m, 2H, CH<sub>2</sub>CH), 1.45 (s, 18H, CH<sub>3</sub>), 1.30 (t,  $J$  = 7.0 Hz, 6H, CH<sub>3</sub>CH<sub>2</sub>). <sup>13</sup>C NMR (126 MHz, CDCl<sub>3</sub>)  $\delta$  161.6 (C-6), 152.5 (d,  $J$  = 116.3 Hz, C-2), 151.2 (s, C-4), 147.6 (d,  $J$  = 3.5 Hz, CHCH<sub>2</sub>), 143.1 (CH-8), 121.0 (d,  $J$  = 182.4 Hz, CHP), 120.0 (C-5), 83.2 (C(CH<sub>3</sub>)<sub>3</sub>), 61.8 (d,  $J$  = 5.5 Hz, CH<sub>2</sub>CH<sub>3</sub>), 54.7 (OCH<sub>3</sub>), 43.0 (CH<sub>2</sub>N), 30.8 (d,  $J$

= 8.0 Hz,  $\underline{\text{CH}_2\text{CH}}$ ), 28.1 ( $\text{CH}_3$ ), 16.5 (d,  $J = 6.3$  Hz,  $\underline{\text{CH}_3\text{CH}_2}$ ).  $^{31}\text{P}$  NMR (202 MHz,  $\text{CDCl}_3$ )  $\delta$  15.5. HMRS TOF ESI+ Found : 556.2535; Calculated for  $\text{C}_{24}\text{H}_{39}\text{N}_5\text{O}_8\text{P}$  : 556.2536 ( $\text{M}+\text{H}$ ) $^+$ .

#### **Diethyl-(Z)-(4-(2-amino-6-methoxy-9H-purin-9-yl)-but-1-en-1-yl)phosphonate**

To a solution of diethyl-(Z)-(4-(2-(bis(*tert*-butoxycarbonyl)amino)-6-methoxy-9H-purin-9-yl)-but-1-en-1-yl)phosphonate (261 mg, 1 eq.) in anhydrous dichloromethane (3 mL/mmol) was added at room temperature a solution of TFA (8 mL/mmol) in anhydrous dichloromethane (3 mL/mmol). The reaction mixture was stirred for 3h with TLC monitoring (DCM/MeOH, 9/1, v/v). Then, the reaction mixture was diluted with  $\text{CH}_2\text{Cl}_2$ , concentrated under vacuum and the crude oil was purified on silica gel by flash chromatography (DCM/MeOH gradient, 0 to 10% MeOH) to obtain quantitatively the desired compound (167 mg).  $^1\text{H}$  NMR (500 MHz,  $\text{CDCl}_3$ )  $\delta$  7.90 (s, 1H,  $\text{H}_{-8}$ ), 6.37 (ddt,  $J = 51.7$ , 13.0, 7.7 Hz, 1H,  $\underline{\text{CHCH}_2}$ ), 5.67 – 5.61 (m, 1H,  $\text{CHP}$ ), 4.35 (t,  $J = 6.7$  Hz, 2H,  $\text{CH}_2\text{N}$ ), 4.06 (s, 3H,  $\text{OCH}_3$ ), 3.90 (m, 4H,  $\underline{\text{CH}_2\text{CH}_3}$ ), 3.10 (tdd,  $J = 6.9$ , 5.0, 2.4 Hz, 2H,  $\underline{\text{CH}_2\text{CH}}$ ), 1.22 (t,  $J = 7.1$  Hz, 6H,  $\underline{\text{CH}_3\text{CH}_2}$ ).  $^{13}\text{C}$  NMR (126 MHz,  $\text{CDCl}_3$ )  $\delta$  158.9 (d,  $J = 6.8$  Hz,  $\text{C}_{-6}$ ), 157.8 ( $\text{C}_{-5}$ ), 147.6 (d,  $J = 3.8$  Hz,  $\underline{\text{CHCH}_2}$ ), 145.0 ( $\text{CH}_{-8}$ ), 128.6 (d,  $J = 83.6$  Hz,  $\text{C}_{-2}$ ), 120.7 (d,  $J = 182.2$  Hz,  $\text{CHP}$ ), 106.8 ( $\text{C}_{-4}$ ), 61.7 (d,  $J = 5.1$  Hz,  $\text{OCH}_2\text{CH}_3$ ), 54.7 ( $\text{OCH}_3$ ), 46.5 ( $\text{CH}_2\text{N}$ ), 31.4 (d,  $J = 7.7$  Hz,  $\underline{\text{CH}_2\text{CH}}$ ), 16.3 (d,  $J = 6.0$  Hz,  $\underline{\text{CH}_3\text{CH}_2}$ ).  $^{31}\text{P}$  NMR (202 MHz,  $\text{CDCl}_3$ )  $\delta$  15.33. HMRS TOF ESI+ Found : 356.1489; Calculated for  $\text{C}_{14}\text{H}_{23}\text{N}_5\text{O}_4\text{P}$  : 356.1488 ( $\text{M}+\text{H}$ ) $^+$

#### **(Z)-(4-(2-amino-6-hydroxy-9H-purin-9-yl)-but-1-en-1-yl)phosphonic acid disodic salt 11b**

The diethyl-(Z)-(4-(2-amino-6-methoxy-9H-purin-9-yl)-but-1-en-1-yl)phosphonate (261 mg, 1 eq.) was dissolved under argon atmosphere in anhydrous DMF (20 mL/mmol) at 0°C. TMSBr (6.6 eq.) was added dropwise to the solution, and the mixture was kept at 0°C for 5 min, then allowed to slowly warm to room temperature and stirred for 3 days. The reaction progress was followed by TLC monitoring (isopropanol/water/ammoniac 7/2/1 v/v/v). The reaction was quenched by addition of a triethylbutylammonium solution (1M, pH 7). The volatiles were removed under vacuum and the resulting aqueous solution was freeze-dried. The crude was purified on reverse phase flash chromatography (water/methanol gradient, 0 to 100% methanol), leading to the phosphonate triethylammonium salts as a white powder. The compound was percolated through a  $\text{Na}^+$  Dowex resin and after freeze-dried of the require fractions the sodium salts were obtained as a white lyophilizate. The desired compound (130 mg) was obtained in 54% yield.  $^1\text{H}$  NMR (500 MHz,  $\text{D}_2\text{O}$ )  $\delta$  7.82 (s, 1H,  $\text{H}_{-8}$ ), 6.11 (ddt,  $J = 45.8$ , 13.0, 7.4 Hz, 1H,  $\underline{\text{CHCH}_2}$ ), 5.83 (ddt,  $J = 17.7$ , 13.1, 1.6 Hz, 1H,  $\text{CHP}$ ), 4.15 (t,  $J = 7.1$  Hz, 2H,  $\text{CH}_2\text{N}$ ), 2.93 (qdd,  $J = 7.0$ , 2.8, 1.5 Hz, 2H,  $\underline{\text{CH}_2\text{CH}}$ ).  $^{13}\text{C}$  NMR (126 MHz,  $\text{D}_2\text{O}$ )  $\delta$  158.9 ( $\text{C}_{-6}$ ), 153.5 ( $\text{C}_{-2}$ ), 151.4 ( $\text{C}_{-5}$ ), 141.1 ( $\underline{\text{CHCH}_2}$ ), 140.1 ( $\text{CH}_{-8}$ ), 126.3 (d,  $J = 171.7$  Hz,  $\text{CHP}$ ), 115.9 ( $\text{C}_{-4}$ ), 42.8 ( $\text{CH}_2\text{N}$ ), 30.2 (d,  $J = 21.8$  Hz, 1C,  $\underline{\text{CH}_2\text{CH}}$ ).  $^{31}\text{P}$  NMR (202 MHz,  $\text{D}_2\text{O}$ )  $\delta$  10.5. HMRS TOF ESI+ Found : 286.0708; Calculated for  $\text{C}_9\text{H}_{13}\text{N}_5\text{O}_4\text{P}$  : 286.0705 ( $\text{M}+\text{H}$ ) $^+$ .

(R)-(3-(6-amino-9H-purin-9-yl)-2-hydroxypropyl)phosphonic acid (R)-1

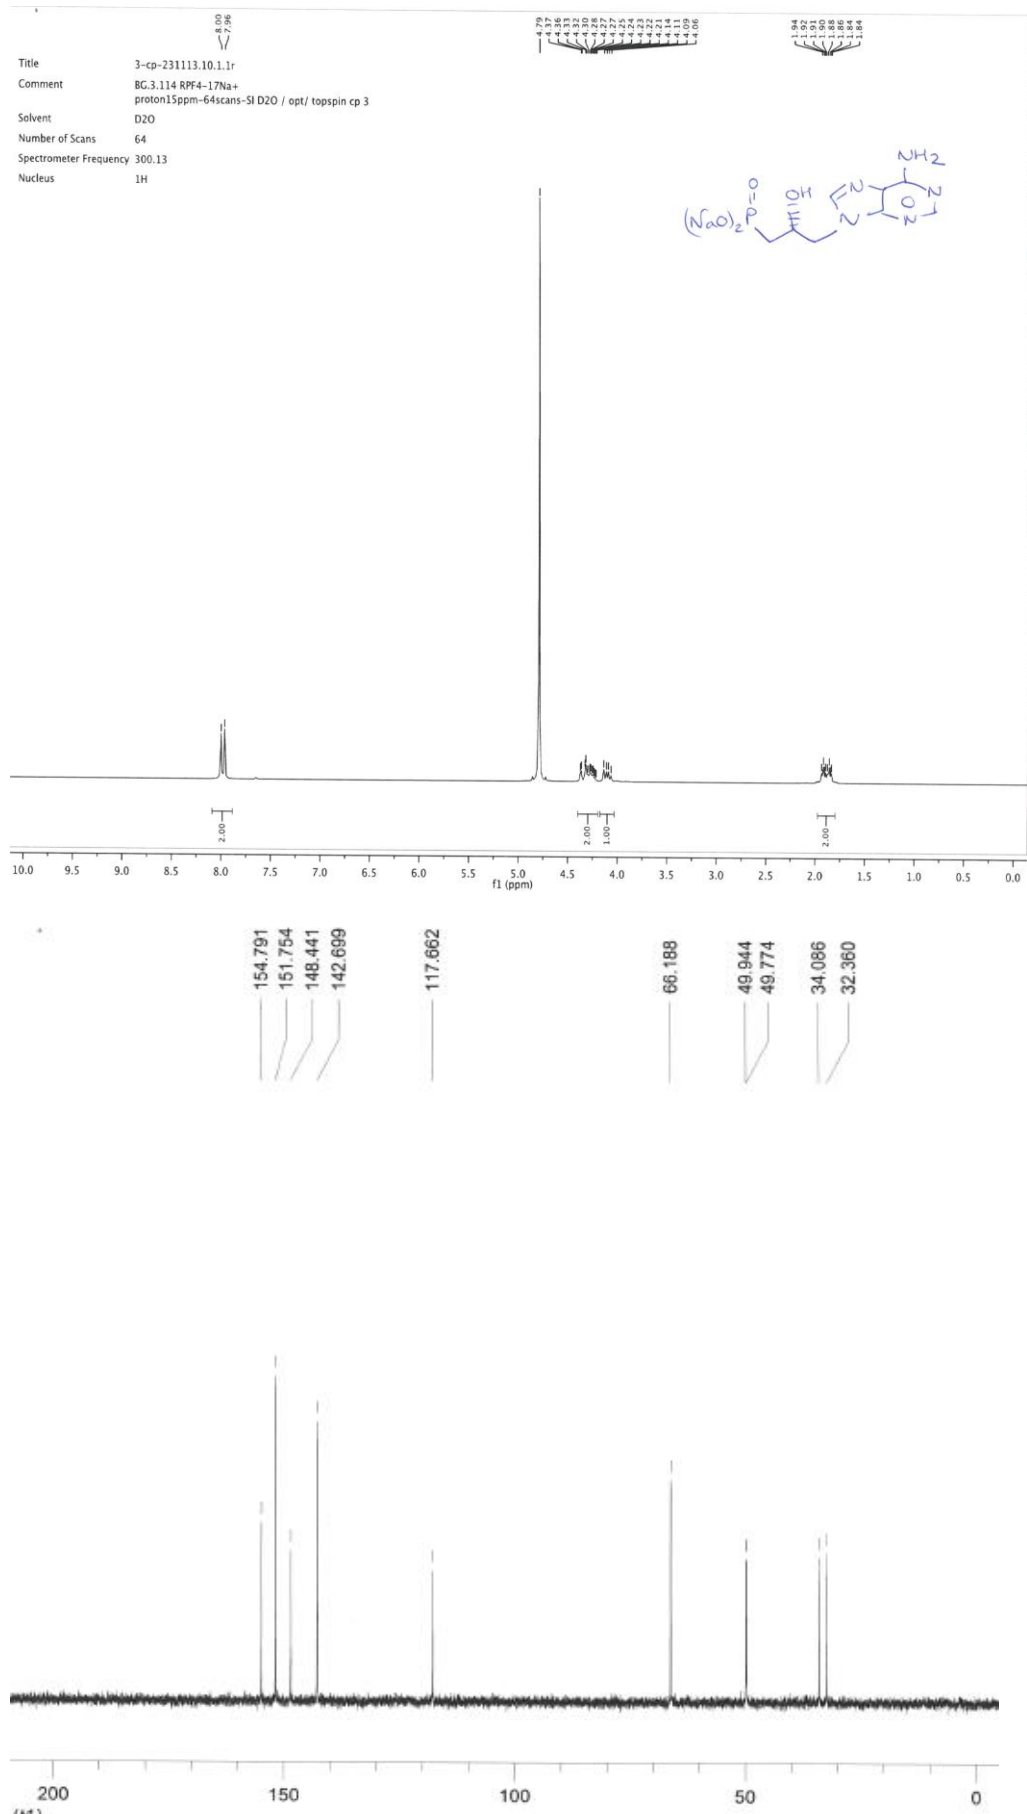

Title 3-cp-231113.11.1.1r  
 Comment BG.3.114 RPF4-17Na+  
 P31dec1H-SI D2O / opt/ topspin cp 3  
 Solvent D2O  
 Number of Scans 128  
 Spectrometer Frequency 121.49  
 Nucleus 31P

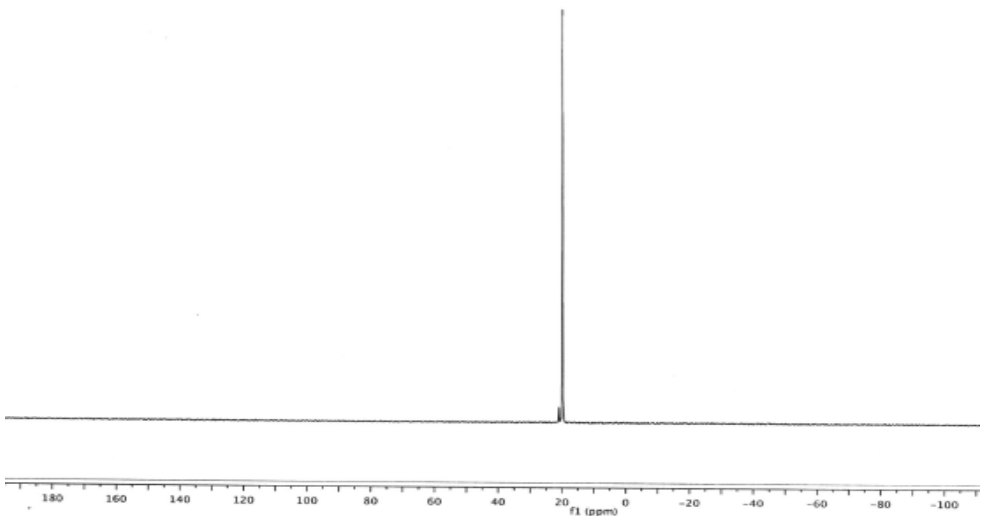

# Elemental Composition Report

Page 1

## Single Mass Analysis

Tolerance = 2.0 PPM / DBE: min = -1.5, max = 50.0

Element prediction: Off

Number of isotope peaks used for i-FIT = 4

Monoisotopic Mass, Even Electron Ions

363 formula(e) evaluated with 1 results within limits (up to 20 closest results for each mass)

Elements Used:

C: 0-100 H: 0-150 N: 0-50 O: 0-50 P: 1-1

SYNAPT G2-SAUER205

Y-CP13053106 33 (0.674) AM2 (Ar:30000.0,0.00,0.00); Cm (30.39)

ACQUAP

31-May-2013

1: TOF MS ES-

1.43e+005

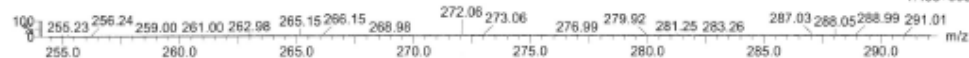

Minimum:

Maximum:

5.0 2.0 -1.5  
 50.0

| Mass     | Calc. Mass | mDa | PPM | DBE | i-FIT  | Norm | Conf(%) | Formula        |
|----------|------------|-----|-----|-----|--------|------|---------|----------------|
| 272.0551 | 272.0549   | 0.2 | 0.7 | 6.5 | 1427.9 | n/a  | n/a     | C8 H11 N5 O4 P |

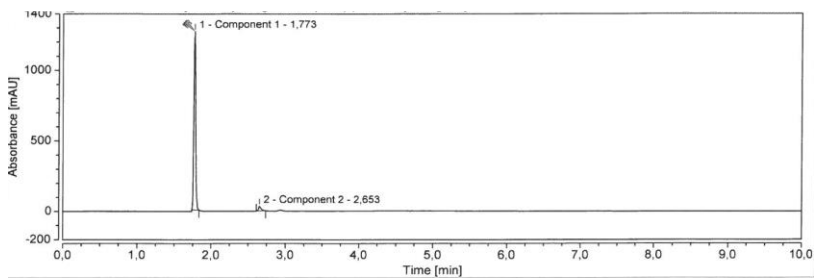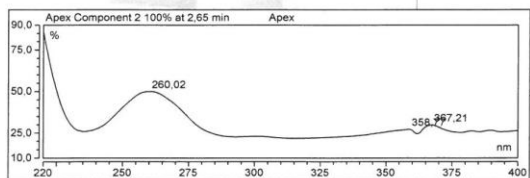

Spectral plot could not be created.  
 No spectra selected.

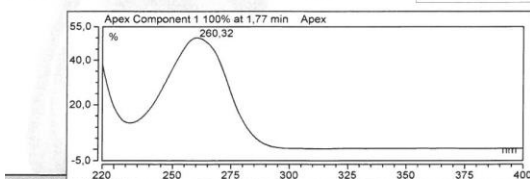

| Integration results |             |                       |                 |               |                    |                      |
|---------------------|-------------|-----------------------|-----------------|---------------|--------------------|----------------------|
| No.                 | Peak Name   | Retention Time<br>min | Area<br>mAU*min | Height<br>mAU | Relative Area<br>% | Relative Height<br>% |
| 1                   | Component 1 | 1.773                 | 37,404          | 1267,116      | 96.74              | 97.43                |
| 2                   | Component 2 | 2.653                 | 1,262           | 33,457        | 3.26               | 2.57                 |
|                     |             |                       |                 |               |                    | n.a.                 |

(S)-(3-(6-amino-9H-purin-9-yl)-2-hydroxypropyl)phosphonic acid (S)-1

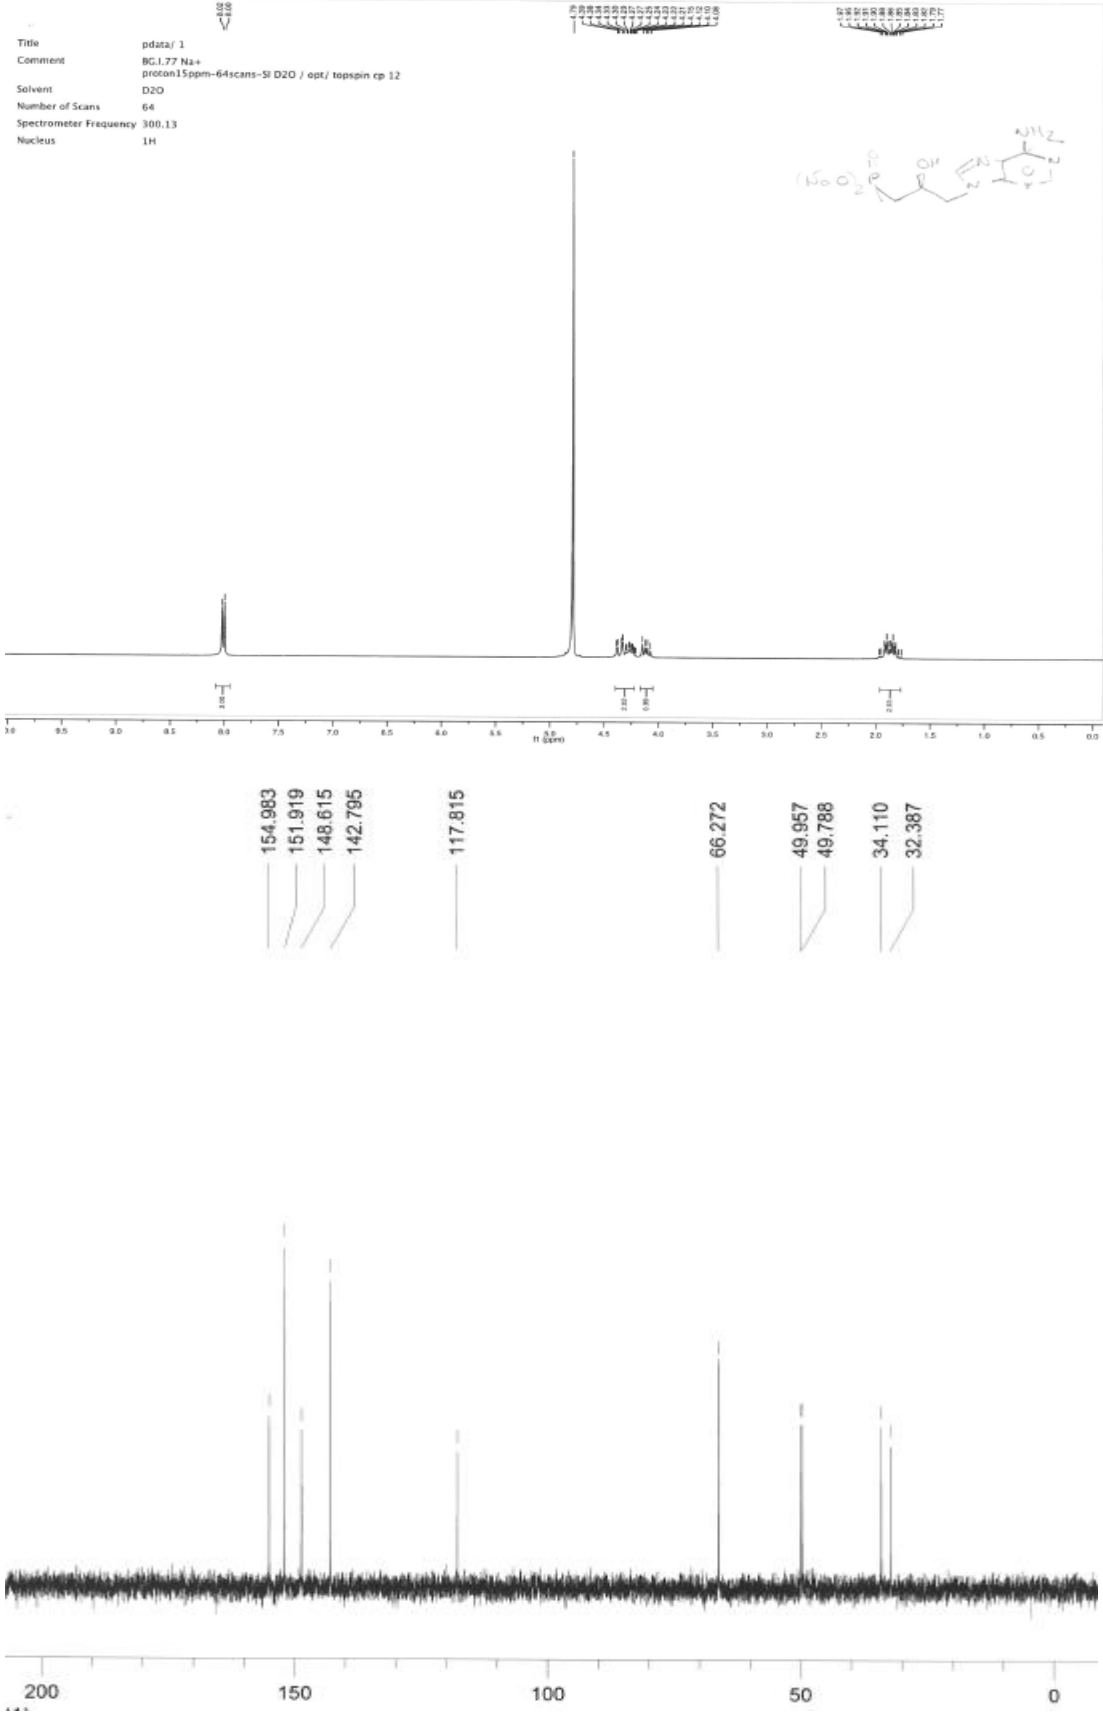



Title pdata/ 1  
 Comment BG1.77 Na+  
 P31dec1H-Si D2O / opt/ topspin cp 12  
 Solvent D2O  
 Number of Scans 128  
 Spectrometer Frequency 121.49  
 Nucleus 31P

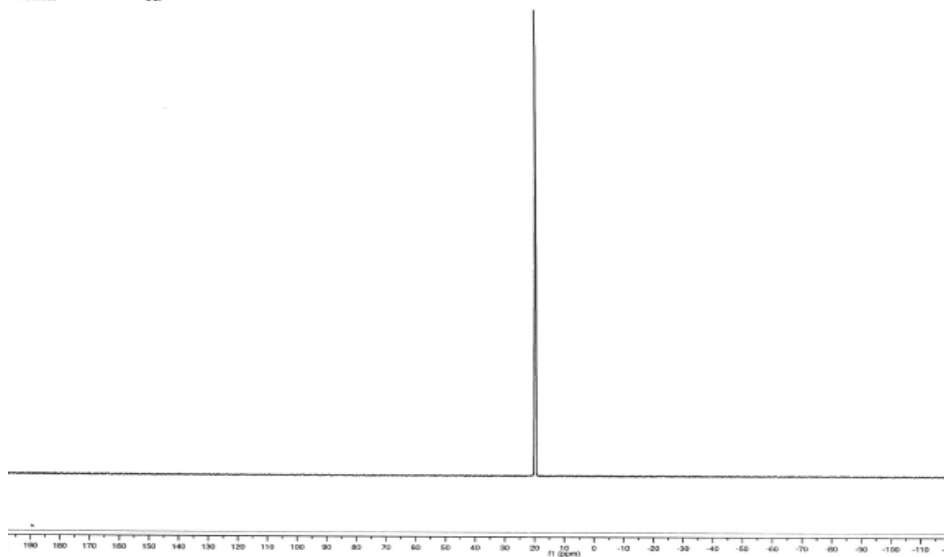

# Elemental Composition Report

Page 1

## Single Mass Analysis

Tolerance = 10.0 PPM / DBE: min = -1.5, max = 50.0  
 Element prediction: Off  
 Number of isotope peaks used for i-FIT = 4

Monoisotopic Mass, Even Electron Ions

342 formula(e) evaluated with 3 results within limits (up to 20 closest results for each mass)

Elements Used:

C: 0-100 H: 0-150 N: 0-50 O: 0-50 Na: 2-2 P: 1-1

SYNAPT G2-S#UEB205

BGI77RPF7-10Na+

Y-CP13091608 14 (0.263) AM2 (Ar,30000.0,0.00,0.00)

16-Sep-2013

1: TOF MS ES+

1.19e+005

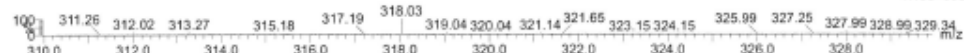

Minimum: -1.5  
 Maximum: 5.0 10.0 50.0

| Mass     | Calc. Mass | mDa  | PPM  | DBE  | i-FIT  | Norm  | Conf(%) | Formula            |
|----------|------------|------|------|------|--------|-------|---------|--------------------|
| 318.0349 | 318.0344   | 0.5  | 1.6  | 5.5  | 1263.7 | 0.645 | 52.45   | C8 H11 N5 O4 Na2 P |
| 318.0331 | 318.0331   | 1.8  | 5.7  | 0.5  | 1264.3 | 1.251 | 28.62   | C7 H15 N O8 Na2 P  |
| 318.0357 | 318.0357   | -0.8 | -2.5 | 10.5 | 1264.7 | 1.664 | 18.93   | C9 H7 N9 Na2 P     |

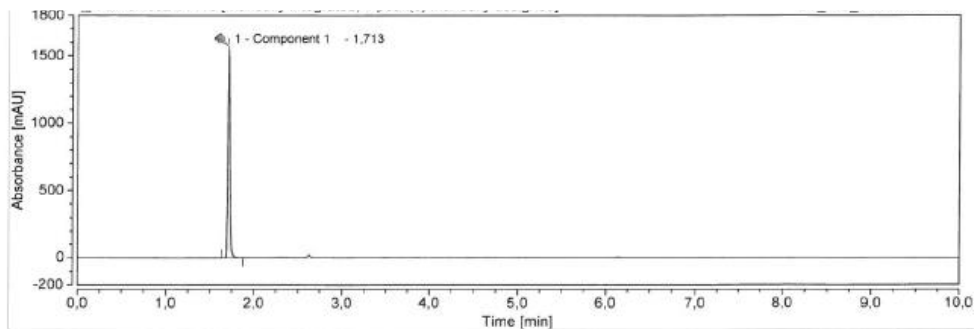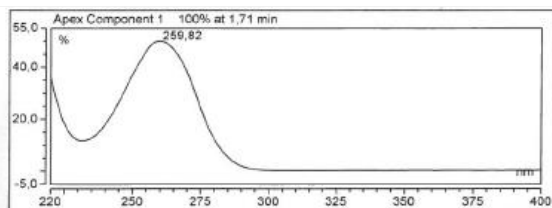

| Integration Results |             |                       |                 |               |                    |                      |        |
|---------------------|-------------|-----------------------|-----------------|---------------|--------------------|----------------------|--------|
| No.                 | Peak Name   | Retention Time<br>min | Area<br>mAU*min | Height<br>mAU | Relative Area<br>% | Relative Height<br>% | Amount |
| 1                   | Component 1 | 1.713                 | 46,130          | 1566,763      | 100,00             | 100,00               | n.a.   |

(R)-(3-(2-amino-6-oxo-9H-purin-9-yl)-2-hydroxypropyl)phosphonic acid (R)-2

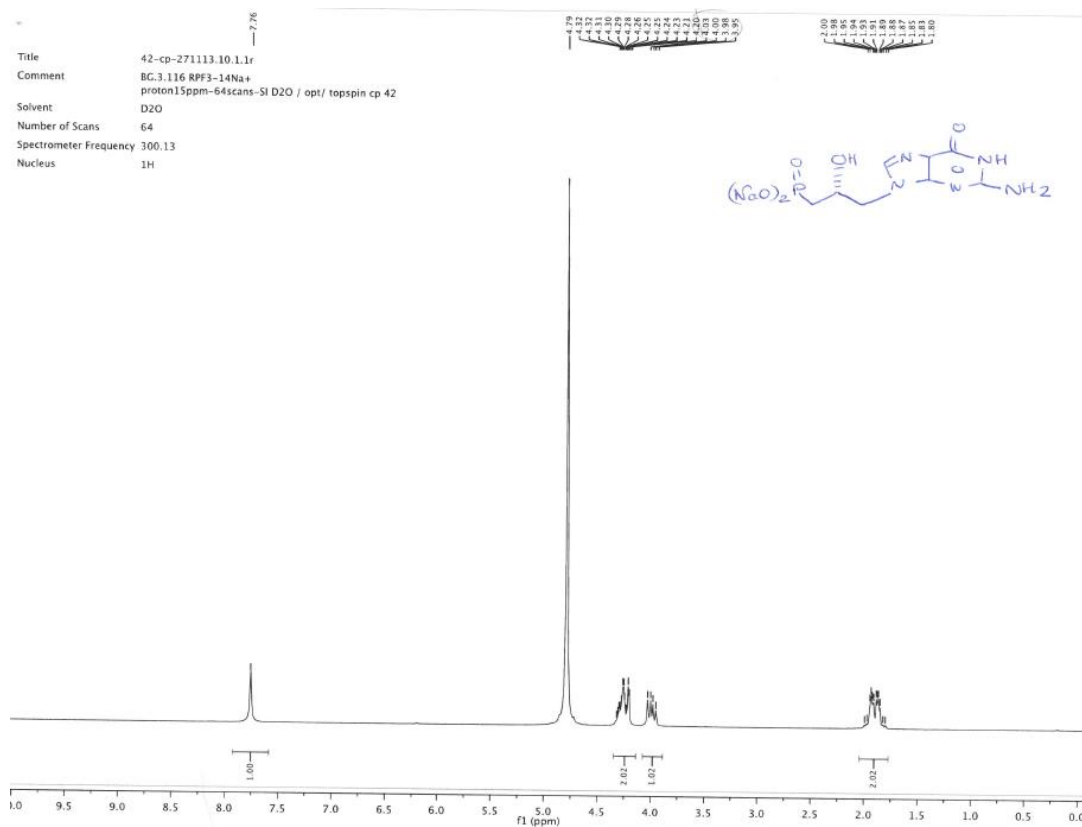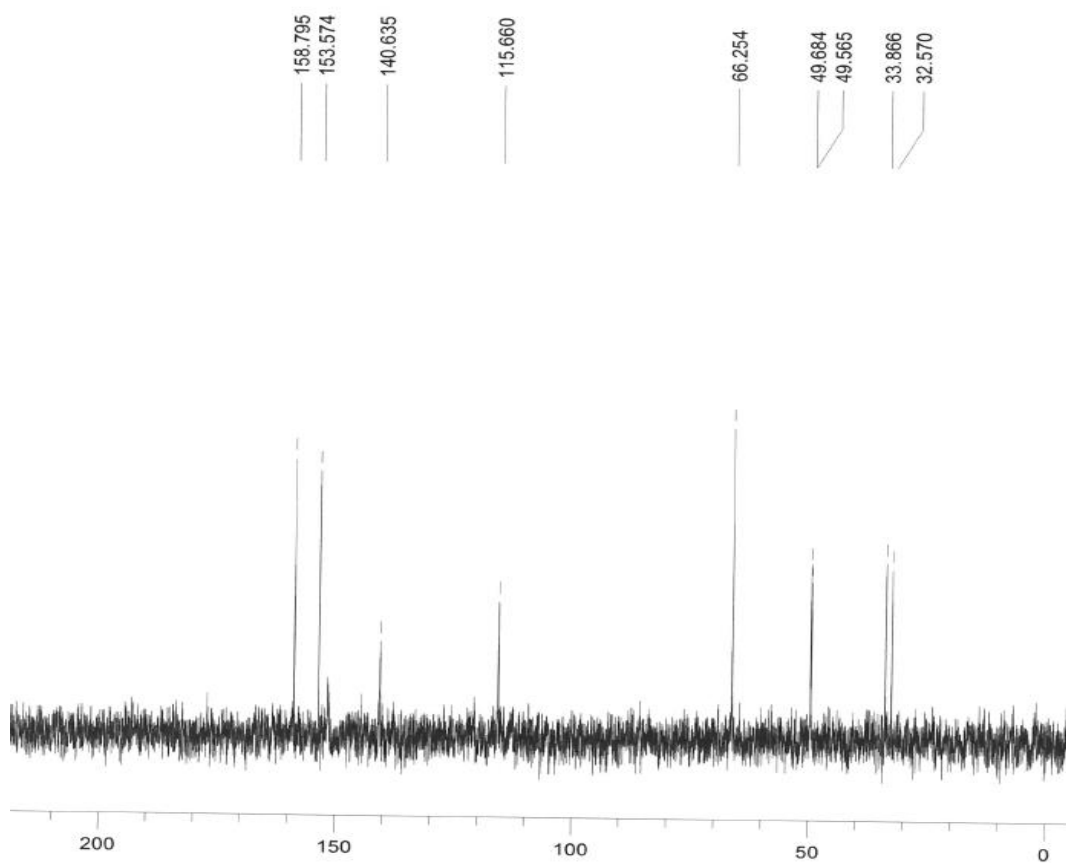

Title 42-cp-271113.11.1.1r  
 Comment BG.3.116 RPF3-14Na+  
 P31dec1H-SI D2O / opt/ topspin cp 42  
 Solvent D2O  
 Number of Scans 128  
 Spectrometer Frequency 121.49  
 Nucleus 31P

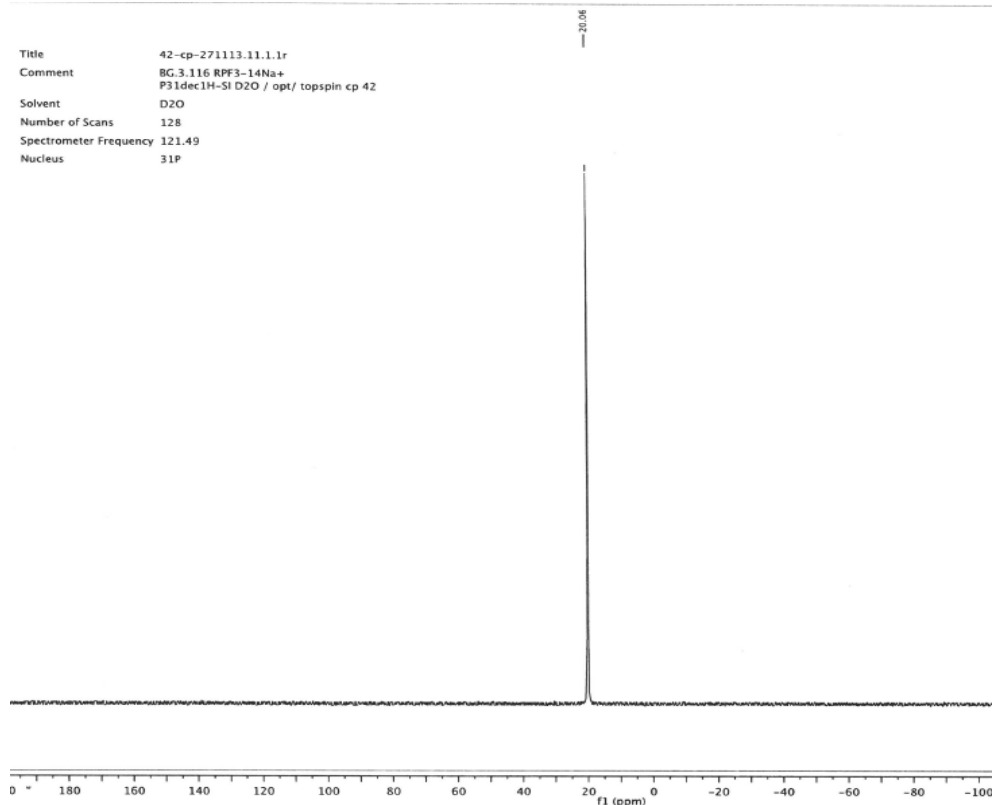

Monoisotopic Mass, Even Electron Ions  
 424 formula(e) evaluated with 1 results within limits (up to 20 closest results for each mass)

Elements Used:

C: 0-100 H: 0-150 N: 0-50 O: 0-50 P: 1-1

SYNAPT G2-S#UEB205

Y-CP13053105 23 (0.465) AM2 (Ar.30000.0,0.00,0.00); Cm (23.32)

BGI71 (RPF1)

31-May-2013  
 1: TOF MS ES-  
 9.36e+005

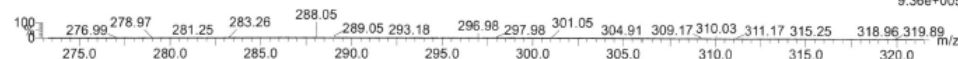

Minimum:

Maximum:

5.0 2.0 50.0

Mass Calc. Mass mDa PPM DBE i-FIT Norm Conf(%) Formula

288.0498 288.0498 0.0 0.0 6.5 1455.3 n/a n/a C8 H11 N5 O5 P

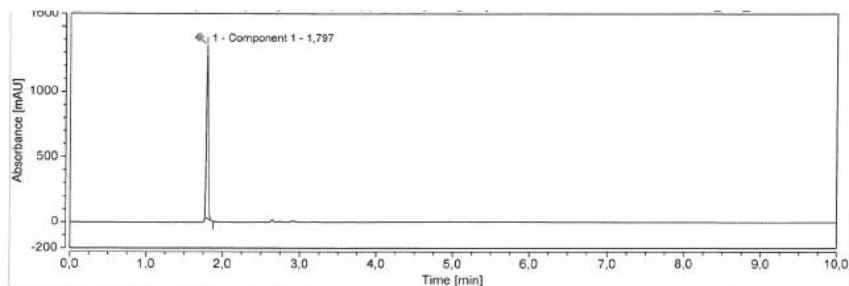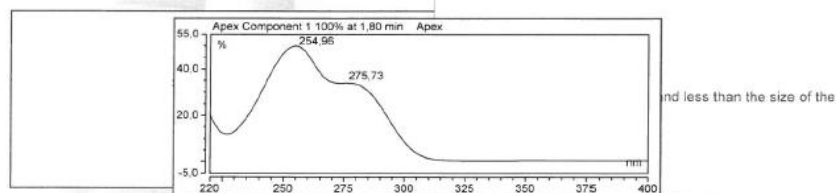

and less than the size of the

#### Integration Results

| No. | Peak Name   | Retention Time<br>min | Area<br>mAU*min | Height<br>mAU | Relative Area<br>% | Relative Height<br>% | Amount |
|-----|-------------|-----------------------|-----------------|---------------|--------------------|----------------------|--------|
| 1   | Component 1 | 1.797                 | 38,749          | 1335,498      | 100,00             | 100,00               | n.a.   |

(S)-(3-(2-amino-6-oxo-9H-purin-9-yl)-2-hydroxypropyl) phosphonic acid (S)-2

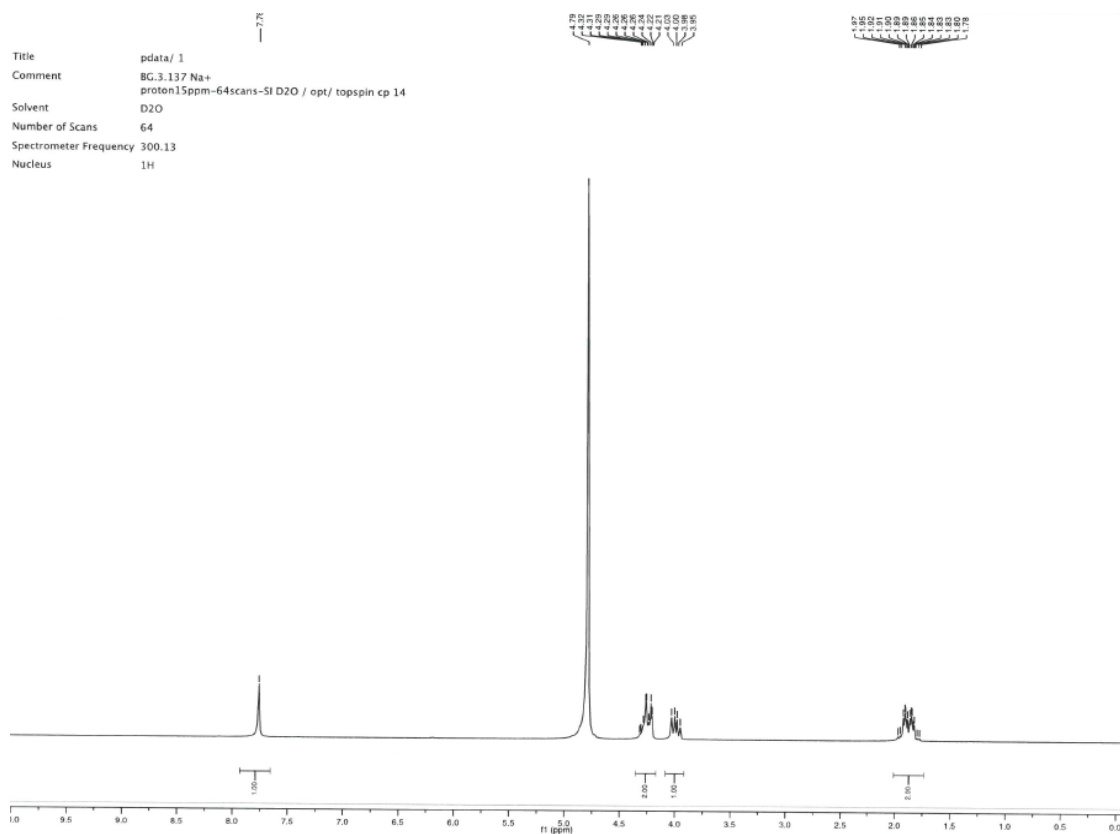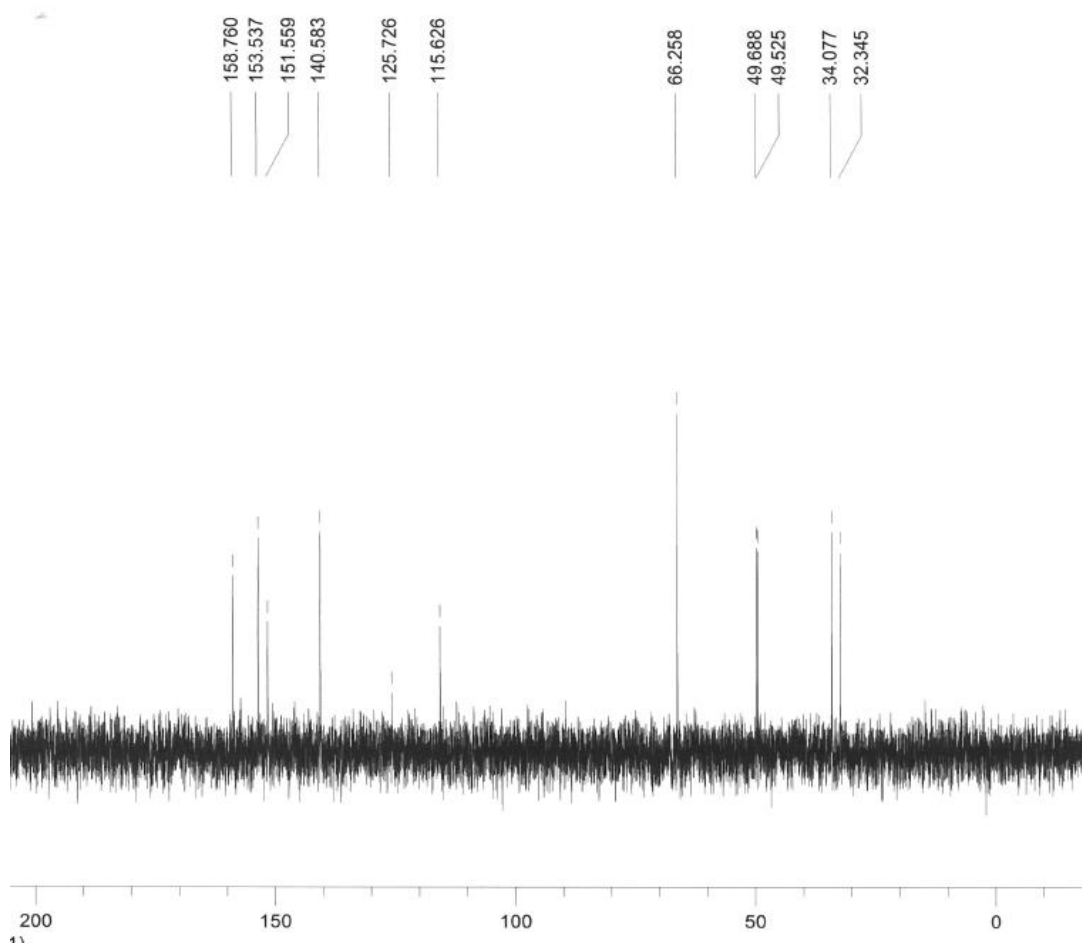

Title pdata/ 1  
 Comment BG.3.137 Na+  
 P31dec1H-Si D2O / opt/ topspin cp 14  
 Solvent D2O  
 Number of Scans 128  
 Spectrometer Frequency 121.49  
 Nucleus 31P

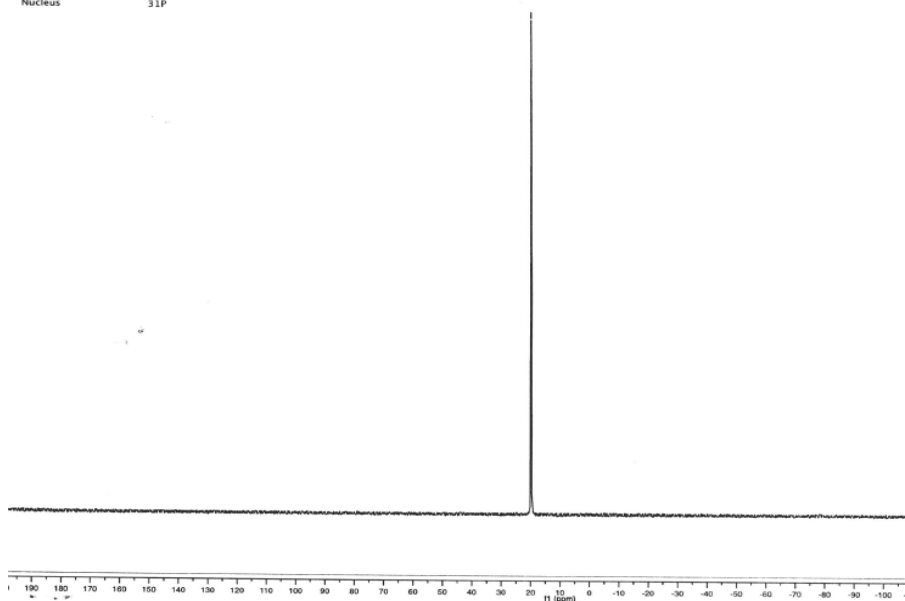

# Elemental Composition Report

Page 1

## Single Mass Analysis

Tolerance = 10.0 PPM / DBE: min = -1.5, max = 50.0

Element prediction: Off

Number of isotope peaks used for i-FIT = 4

Monoisotopic Mass, Even Electron Ions

401 formula(e) evaluated with 4 results within limits (up to 20 closest results for each mass)

Elements Used:

C: 0-100 H: 0-150 N: 0-50 O: 0-50 Na: 2-2 P: 1-1

SYNAPT G2-S#UEB205

BGI78RPF4-5Na+

Y-CP13091609 11 (0.213) AM2 (Ar,30000.0,0.00,0.00)

16-Sep-2013

1: TOF MS ES+

1.72e+005

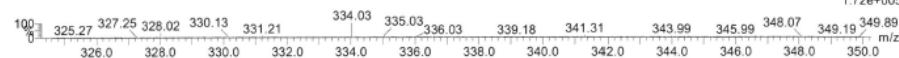

Minimum: -1.5  
 Maximum: 5.0 10.0 50.0

| Mass     | Calc. Mass | mDa  | PPM  | DBE    | i-FIT  | Norm  | Conf (%) | Formula             |
|----------|------------|------|------|--------|--------|-------|----------|---------------------|
| 334.0302 | 334.0293   | 0.9  | 2.7  | 5.5    | 1224.9 | 0.096 | 90.82    | C8 H11 N5 O5 Na2 P  |
| 334.0307 | -0.5       | -1.5 | 10.5 | 1227.6 | 2.832  | 5.89  |          | C9 H7 N9 O Na2 P    |
| 334.0333 | -3.1       | -9.3 | 9.5  | 1228.8 | 3.991  | 1.85  |          | C13 H11 N3 O3 Na2 P |
| 334.0280 | 2.2        | 6.6  | 0.5  | 1229.0 | 4.240  | 1.44  |          | C7 H15 N O9 Na2 P   |

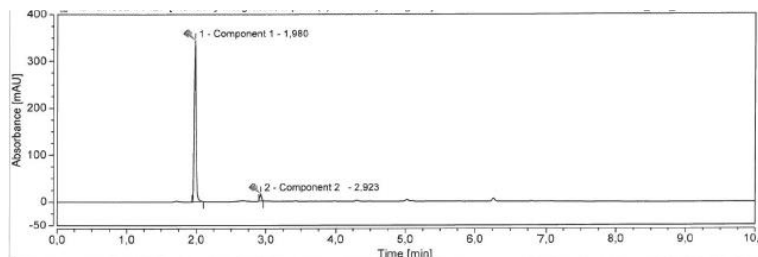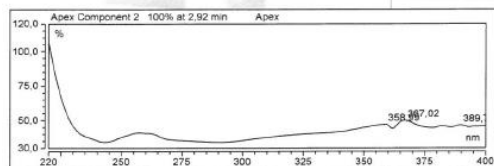

Spectral plot could not be created.  
 No spectra selected.

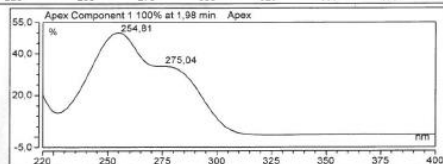

| No.  | Peak Name   | Retention Time min | Area mAU*min | Height mAU | Relative Area % | Relative Height % | Amount |
|------|-------------|--------------------|--------------|------------|-----------------|-------------------|--------|
| 1    | Component 1 | 1.980              | 10.921       | 344.675    | 96.45           | 95.77             | n.a.   |
| n.a. | Component 2 | n.a.               | n.a.         | n.a.       | n.a.            | n.a.              | n.a.   |
| 2    | Component 2 | 2.923              | 0.402        | 15.231     | 3.55            | 4.23              | n.a.   |

**(R)-(3-(2,6-diamino-9H-purin-9-yl)-2-hydroxypropyl) phosphonic acid (R)-3**

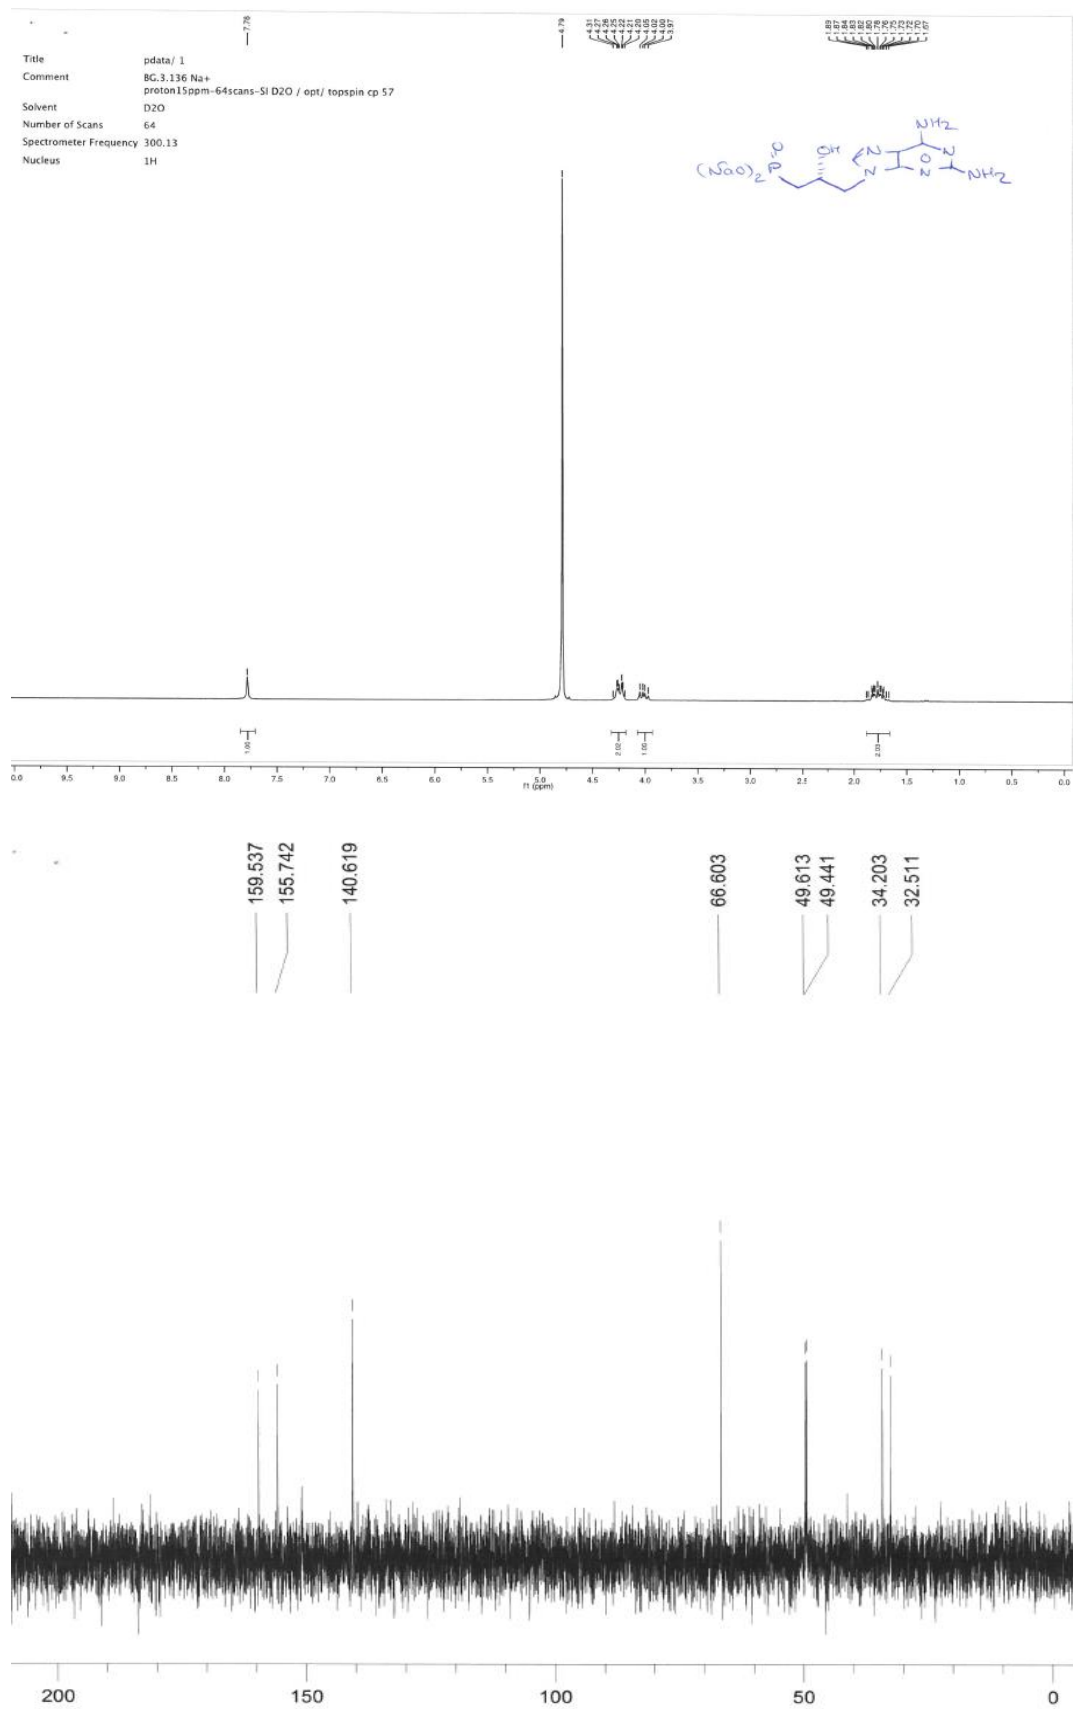

Title pdata/ 1  
 Comment BG.3.136 Na+  
 P31dec1H-SI D2O / opt/ topspin cp 10  
 Solvent D2O  
 Number of Scans 128  
 Spectrometer Frequency 121.49  
 Nucleus 31P

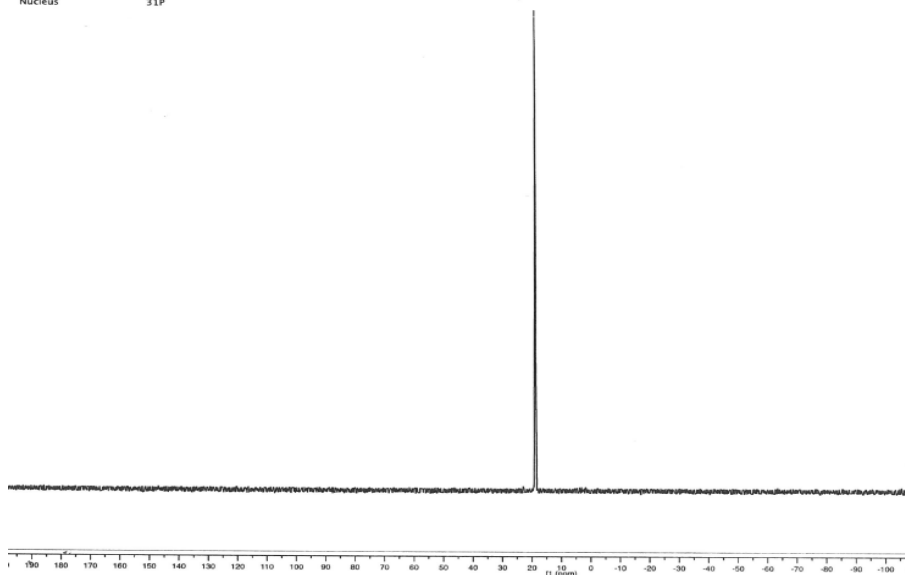

# Elemental Composition Report

Page 1

## Single Mass Analysis

Tolerance = 10.0 PPM / DBE: min = -1.5, max = 50.0

Element prediction: Off

Number of isotope peaks used for i-FIT = 4

Monoisotopic Mass, Even Electron Ions

386 formula(e) evaluated with 5 results within limits (up to 20 closest results for each mass)

Elements Used:

C: 0-100 H: 0-150 N: 0-50 O: 0-50 Na: 2-2 P: 1-1

SYNAPT G2-S#UEB205

BGI95RPF5-12Na+

Y-CP13091610 12 (0.229) AM2 (Ar.30000.0.0.0.0.0.0)

16-Sep-2013

1: TOF MS ES+

3.88e+006

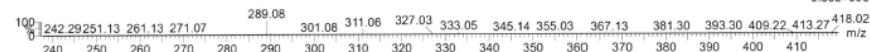

Minimum: -1.5  
 Maximum: 50.0

| Mass     | Calc. Mass | mDa  | PPM  | DBE  | i-FIT  | Norm  | Conf (%) | Formula             |
|----------|------------|------|------|------|--------|-------|----------|---------------------|
| 333.0460 | 333.0453   | 0.7  | 2.1  | 5.5  | 1198.7 | 0.013 | 98.69    | C8 H12 N6 O4 Na2 P  |
|          | 333.0440   | 2.0  | 6.0  | 0.5  | 1203.5 | 4.798 | 0.82     | C7 H16 N2 O8 Na2 P  |
|          | 333.0480   | -2.0 | -6.0 | 4.5  | 1204.2 | 5.529 | 0.40     | C12 H16 O6 Na2 F    |
|          | 333.0466   | -0.6 | -1.8 | 10.5 | 1206.3 | 7.585 | 0.05     | C9 H8 N10 Na2 P     |
|          | 333.0493   | -3.3 | -9.9 | 9.5  | 1206.7 | 7.983 | 0.03     | C13 H12 N4 O2 Na2 P |

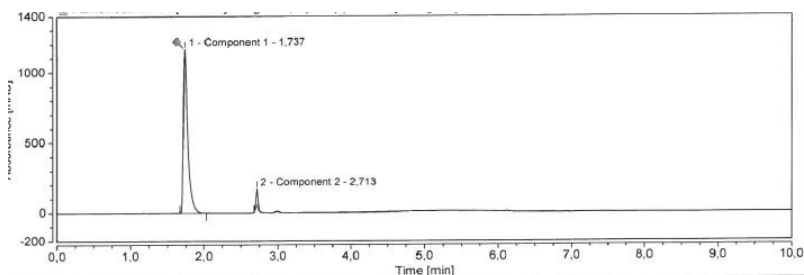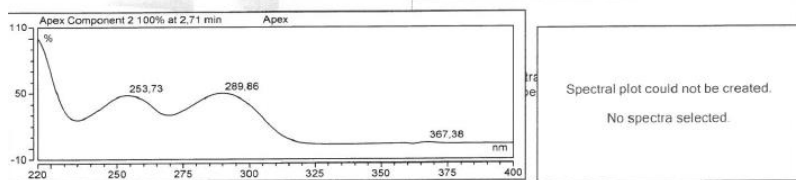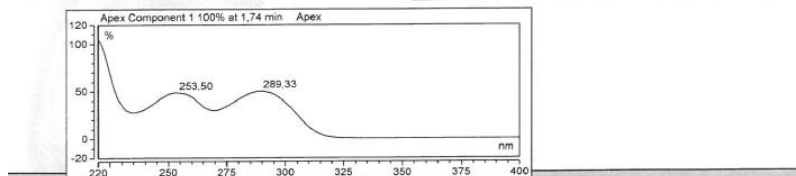

| Integration Results |             |                    |              |            |                 |                   |        |
|---------------------|-------------|--------------------|--------------|------------|-----------------|-------------------|--------|
| lo.                 | Peak Name   | Retention Time min | Area mAU*min | Height mAU | Relative Area % | Relative Height % | Amount |
|                     | Component 1 | 1,737              | 76,497       | 1168,777   | 95,97           | 90,28             | n.a.   |
|                     | Component 2 | 2,713              | 3,212        | 125,814    | 4,03            | 9,72              | n.a.   |

(S)-(3-(2,6-diamino-9H-purin-9-yl)-2-hydroxypropyl) phosphonic acid (S)-3

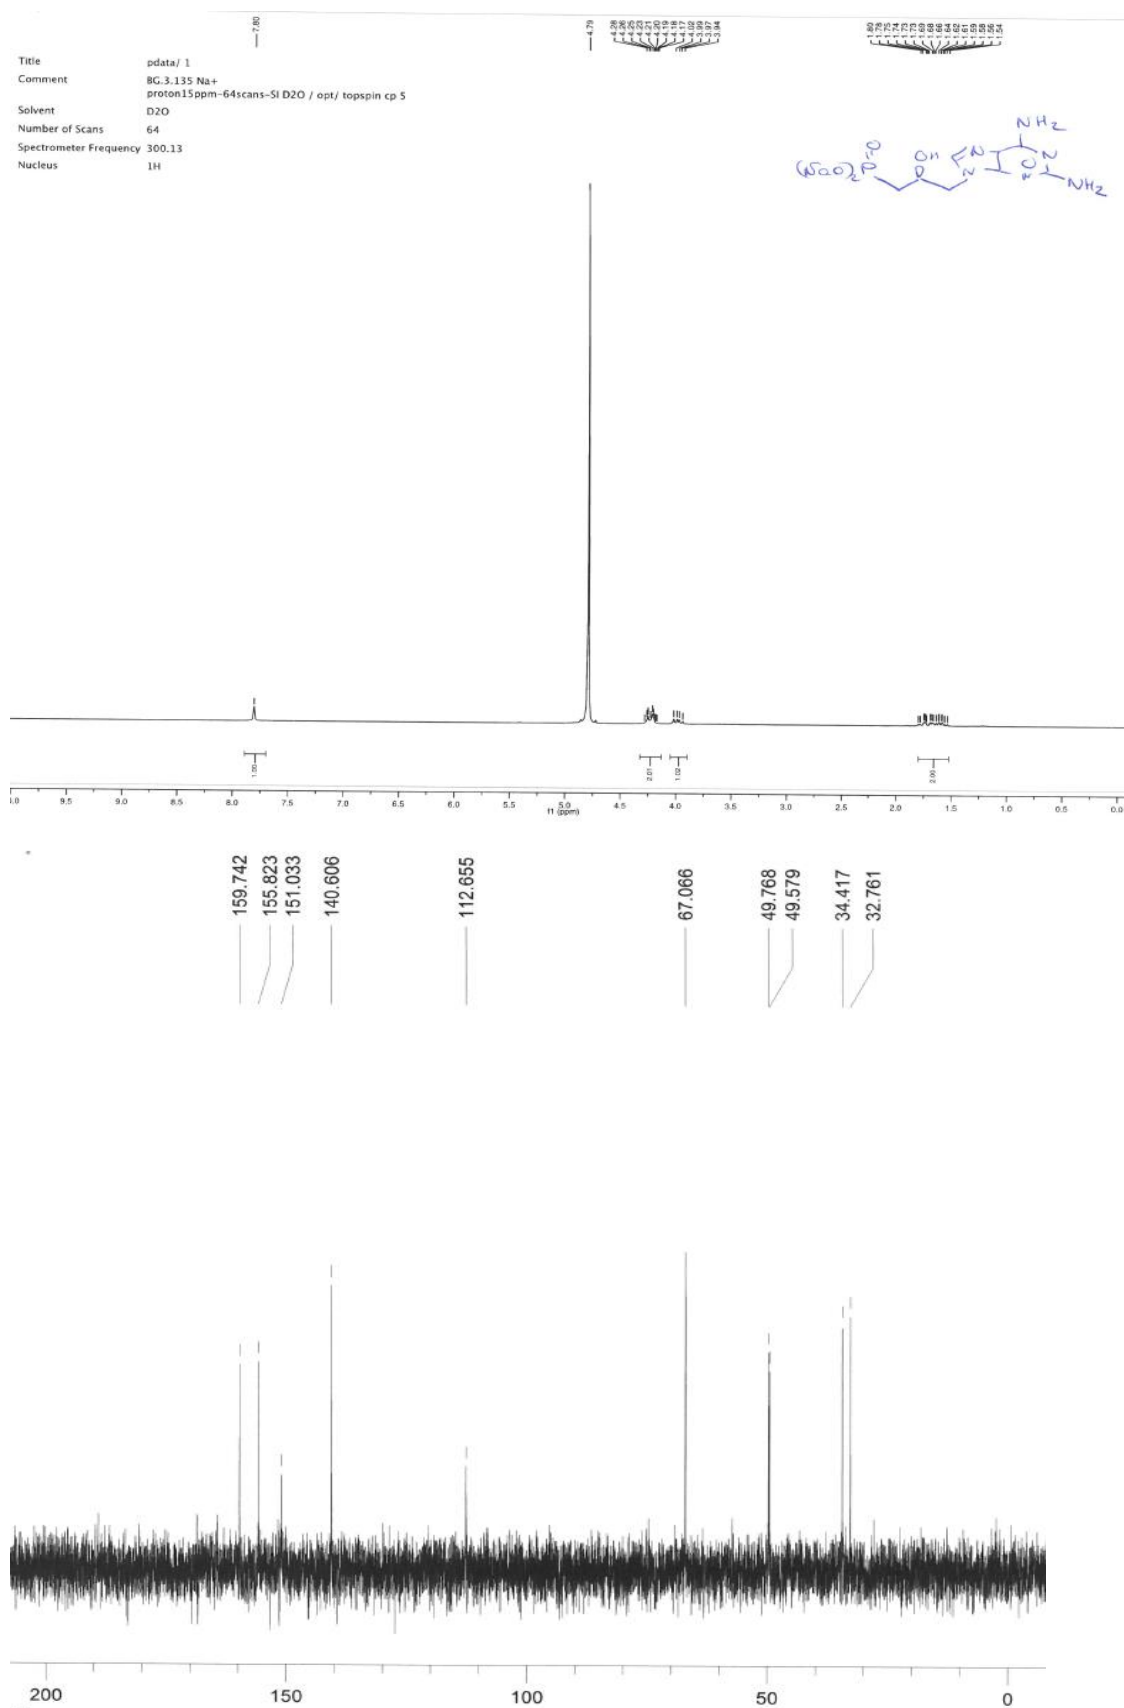



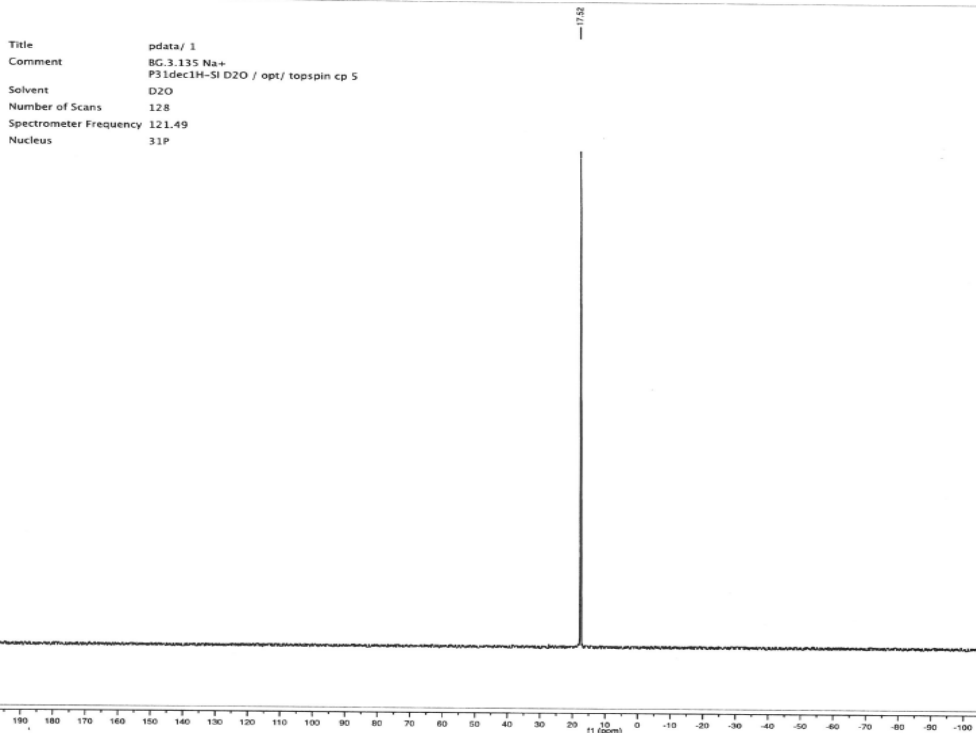

## Elemental Composition Report

Page 1

### Single Mass Analysis

Tolerance = 10.0 PPM / DBE: min = -1.5, max = 50.0

Element prediction: Off

Number of isotope peaks used for i-FIT = 4

Monoisotopic Mass, Even Electron Ions

386 formula(e) evaluated with 6 results within limits (up to 20 closest results for each mass)

Elements Used:

C: 0-100 H: 0-150 N: 0-50 O: 0-50 Na: 2-2 P: 1-1

SYNAPT G2-S#UEB205

BGI94RPF4-12Na+

Y-CP13091611 8 (0.157) AM2 (At.30000.0,0.00,0.00), Cm (8.16)

16-Sep-2013

1: TOP MS ES+

8.12e+006

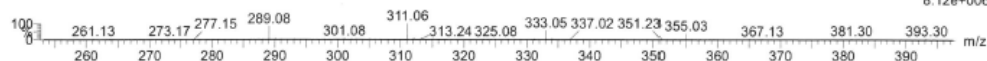

Minimum: -1.5  
Maximum: 5.0 10.0 50.0

| Mass     | Calc. Mass | mDa  | PPM  | DBE    | i-FIT  | Norm  | Conf (%) | Formula            |
|----------|------------|------|------|--------|--------|-------|----------|--------------------|
| 333.0450 | 333.0453   | -0.3 | -0.9 | 5.5    | 1752.5 | 0.001 | 99.94    | C8 H12 N6 O4 Na2 P |
| 333.0440 | 1.0        | 3.0  | 0.5  | 1760.0 | 7.502  | 0.06  |          | C7 H16 N2 O8 Na2 P |
| 333.0480 | -3.0       | -9.0 | 4.5  | 1763.2 | 10.693 | 0.00  |          | C12 H16 O6 Na2 P   |
| 333.0466 | -1.6       | -4.8 | 10.5 | 1765.7 | 13.140 | 0.00  |          | C9 H8 N10 Na2 P    |
| 333.0426 | 2.4        | 7.2  | 6.5  | 1766.2 | 13.703 | 0.00  |          | C4 H8 N12 O2 Na2 P |
| 333.0421 | 2.9        | 8.7  | 13.5 | 1769.9 | 17.402 | 0.00  |          | C19 H12 O Na2 P    |

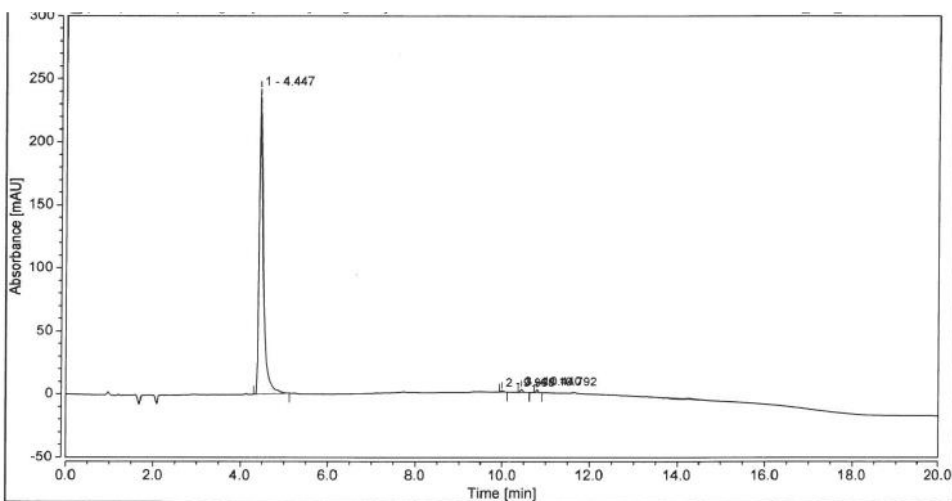

### Integration Results

| No. | Peak Name | Retention Time min | Area mAU*min | Height mAU | Relative Area % | Relative Height % | Amount |
|-----|-----------|--------------------|--------------|------------|-----------------|-------------------|--------|
| 1   |           | 4.447              | 25.454       | 241.913    | 98.50           | 97.38             | n.a.   |
| 2   |           | 9.998              | 0.086        | 1.366      | 0.33            | 0.55              | n.a.   |
| 3   |           | 10.440             | 0.166        | 2.698      | 0.64            | 1.09              | n.a.   |
| 4   |           | 10.792             | 0.137        | 2.446      | 0.53            | 0.98              | n.a.   |

**(R)-(4-(6-amino-9H-purin-9-yl)-2-hydroxybutyl)phosphonic acid (R)-4**

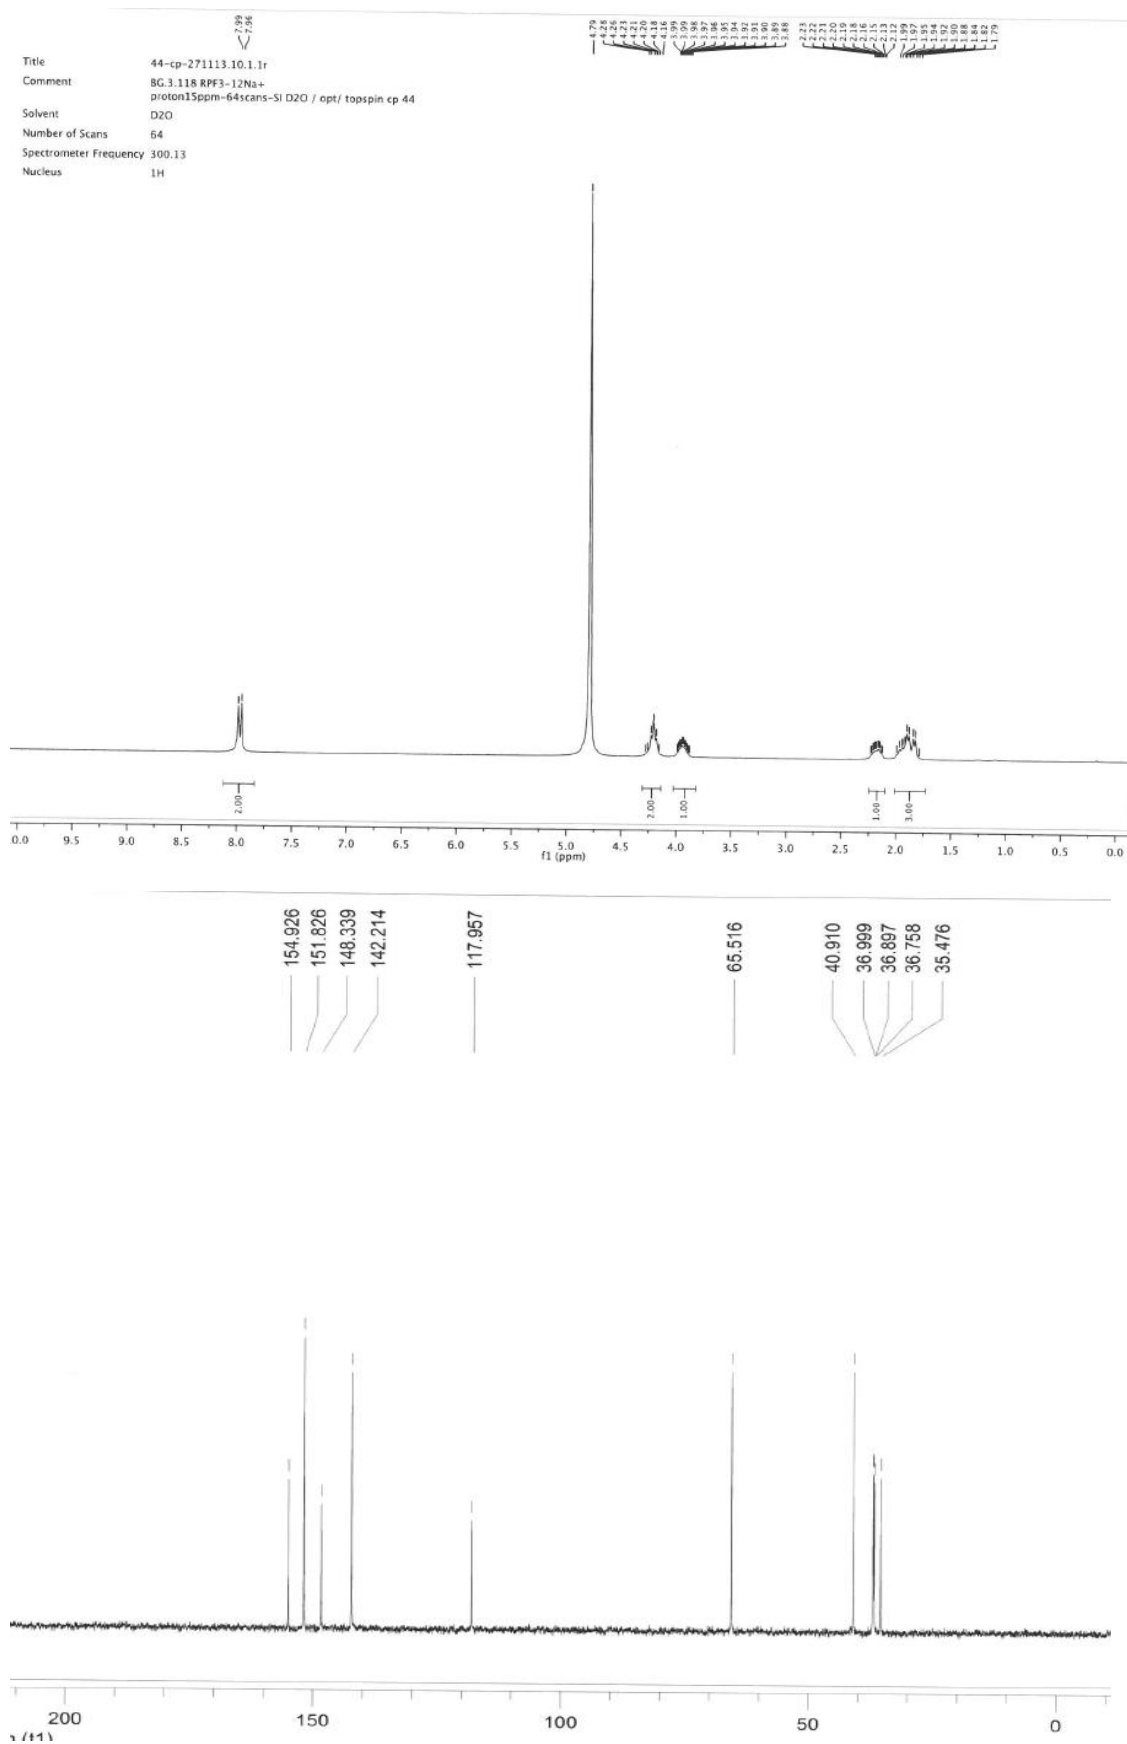

Title 44-cp-271113.11.1.1r  
 Comment BG.3.118 RPF3-12Na+  
 P31dec1H-SI D2O / opt/ topspin cp 44  
 Solvent D2O  
 Number of Scans 128  
 Spectrometer Frequency 121.49  
 Nucleus 31P

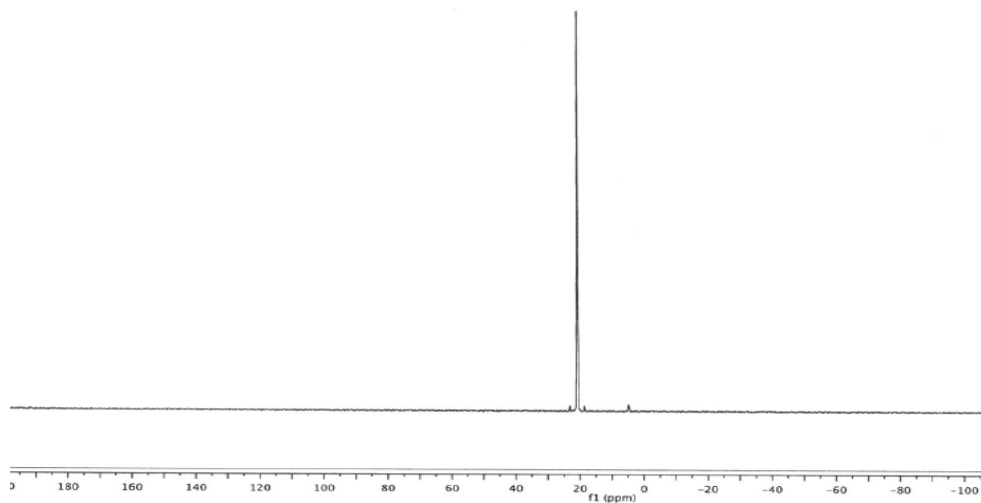

## Elemental Composition Report

Page 1

### Single Mass Analysis

Tolerance = 2.0 PPM / DBE: min = -1.5, max = 50.0

Element prediction: Off

Number of isotope peaks used for i-FIT = 4

Monoisotopic Mass, Even Electron Ions

422 formula(e) evaluated with 1 results within limits (up to 20 closest results for each mass)

Elements Used:

C: 0-100 H: 0-150 N: 0-50 O: 0-50 P: 1-1

SYNAPT G2-S#NotSet

Y-CP14091902 17 (0.329) Cm (17)

BG3.118

19-Sep-2014

1: TOF MS ES+

5.03e+005

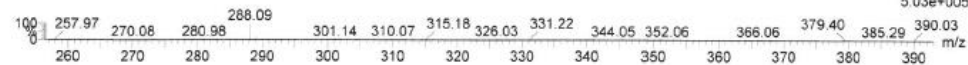

Minimum: -1.5  
 Maximum: 50.0

| Mass     | Calc. Mass | mDa | PPM | DBE | i-FIT  | Norm | Conf(%) | Formula        |
|----------|------------|-----|-----|-----|--------|------|---------|----------------|
| 288.0867 | 288.0862   | 0.5 | 1.7 | 5.5 | 2642.5 | n/a  | n/a     | C9 H15 N5 O4 P |

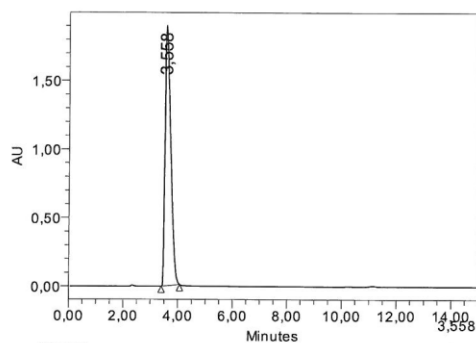

|   | RT    | Area     | % Area | Height  |
|---|-------|----------|--------|---------|
| 1 | 3,558 | 27201874 | 100,00 | 1912409 |

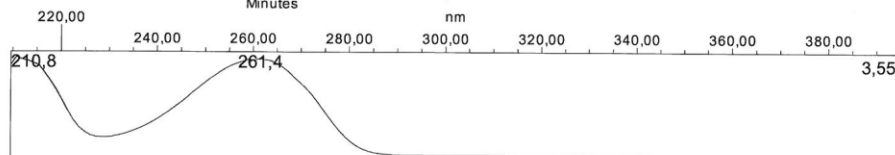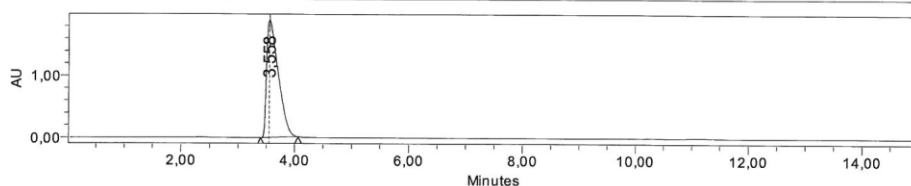

Title pdata/ 1  
Comment BG-3.147 Na+  
proton15ppm-64scans-SI D2O / opt/ topspin cp 9  
Solvent D2O  
Number of Scans 64  
Spectrometer Frequency 300.13  
Nucleus 1H

Chemical structure of compound 15 is shown above the spectrum:

N[C@@H]1CNC(=N)[C@H](N1)CCOP(=O)([O-])[O-]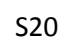

Title pdata/ 1  
 Comment BG 3.147 Na+  
 Solvent P11dec1H-SI D2O / opt/ topspin cp 9  
 Number of Scans 128  
 Spectrometer Frequency 121.49  
 Nucleus 31P

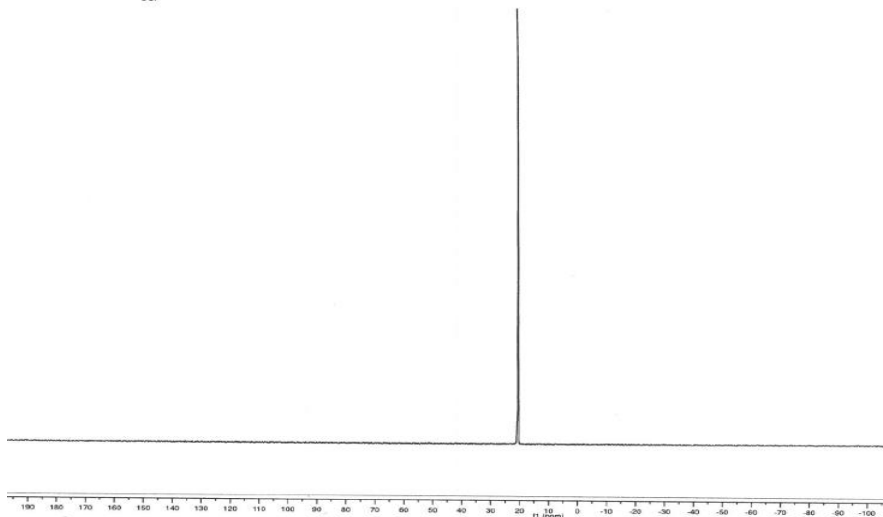

## Elemental Composition Report

Page 1

### Single Mass Analysis

Tolerance = 2.0 PPM / DBE: min = -1.5, max = 50.0

Element prediction: Off

Number of isotope peaks used for i-FIT = 4

Monoisotopic Mass, Even Electron Ions

422 formula(e) evaluated with 1 results within limits (up to 20 closest results for each mass)

Elements Used:

C: 0-100 H: 0-150 N: 0-50 O: 0-50 P: 1-1

SYNAPT G2-S#NotSet

BG3.147

19-Sep-2014

1: TOF MS ES+

7.83e+005

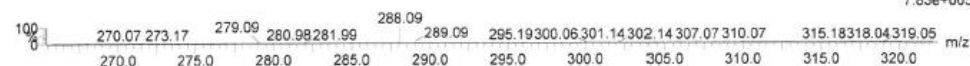

Minimum: -1.5  
 Maximum: 50.0

| Mass     | Calc. Mass | mDa  | PPM  | DBE | i-FIT  | Norm | Conf(%) | Formula        |
|----------|------------|------|------|-----|--------|------|---------|----------------|
| 288.0860 | 288.0862   | -0.2 | -0.7 | 5.5 | 3401.7 | n/a  | n/a     | C9 H15 N5 O4 P |

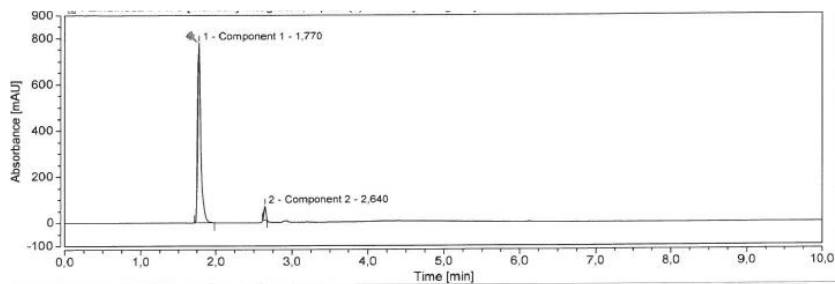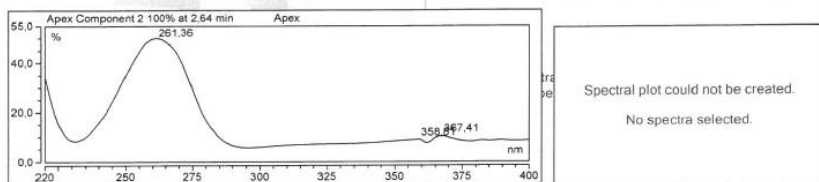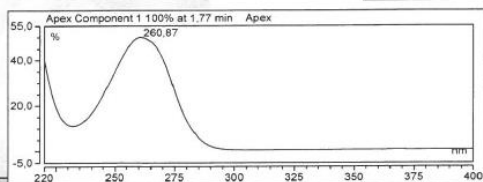

| Integration results |             |                    |              |            |                 |                   |        |
|---------------------|-------------|--------------------|--------------|------------|-----------------|-------------------|--------|
| No.                 | Peak Name   | Retention Time min | Area mAU*min | Height mAU | Relative Area % | Relative Height % | Amount |
| 1                   | Component 1 | 1.770              | 35.223       | 779.205    | 96.37           | 92.87             | n.a.   |
| 2                   | Component 2 | 2.640              | 1.712        | 59.831     | 4.63            | 7.13              | n.a.   |
| n.a.                | Component 3 | n.a.               | n.a.         | n.a.       | n.a.            | n.a.              | n.a.   |

(R)-4-(2-amino-6-oxo-9H-purin-9-yl)-2-hydroxybutyl phosphonic acid (R)-5

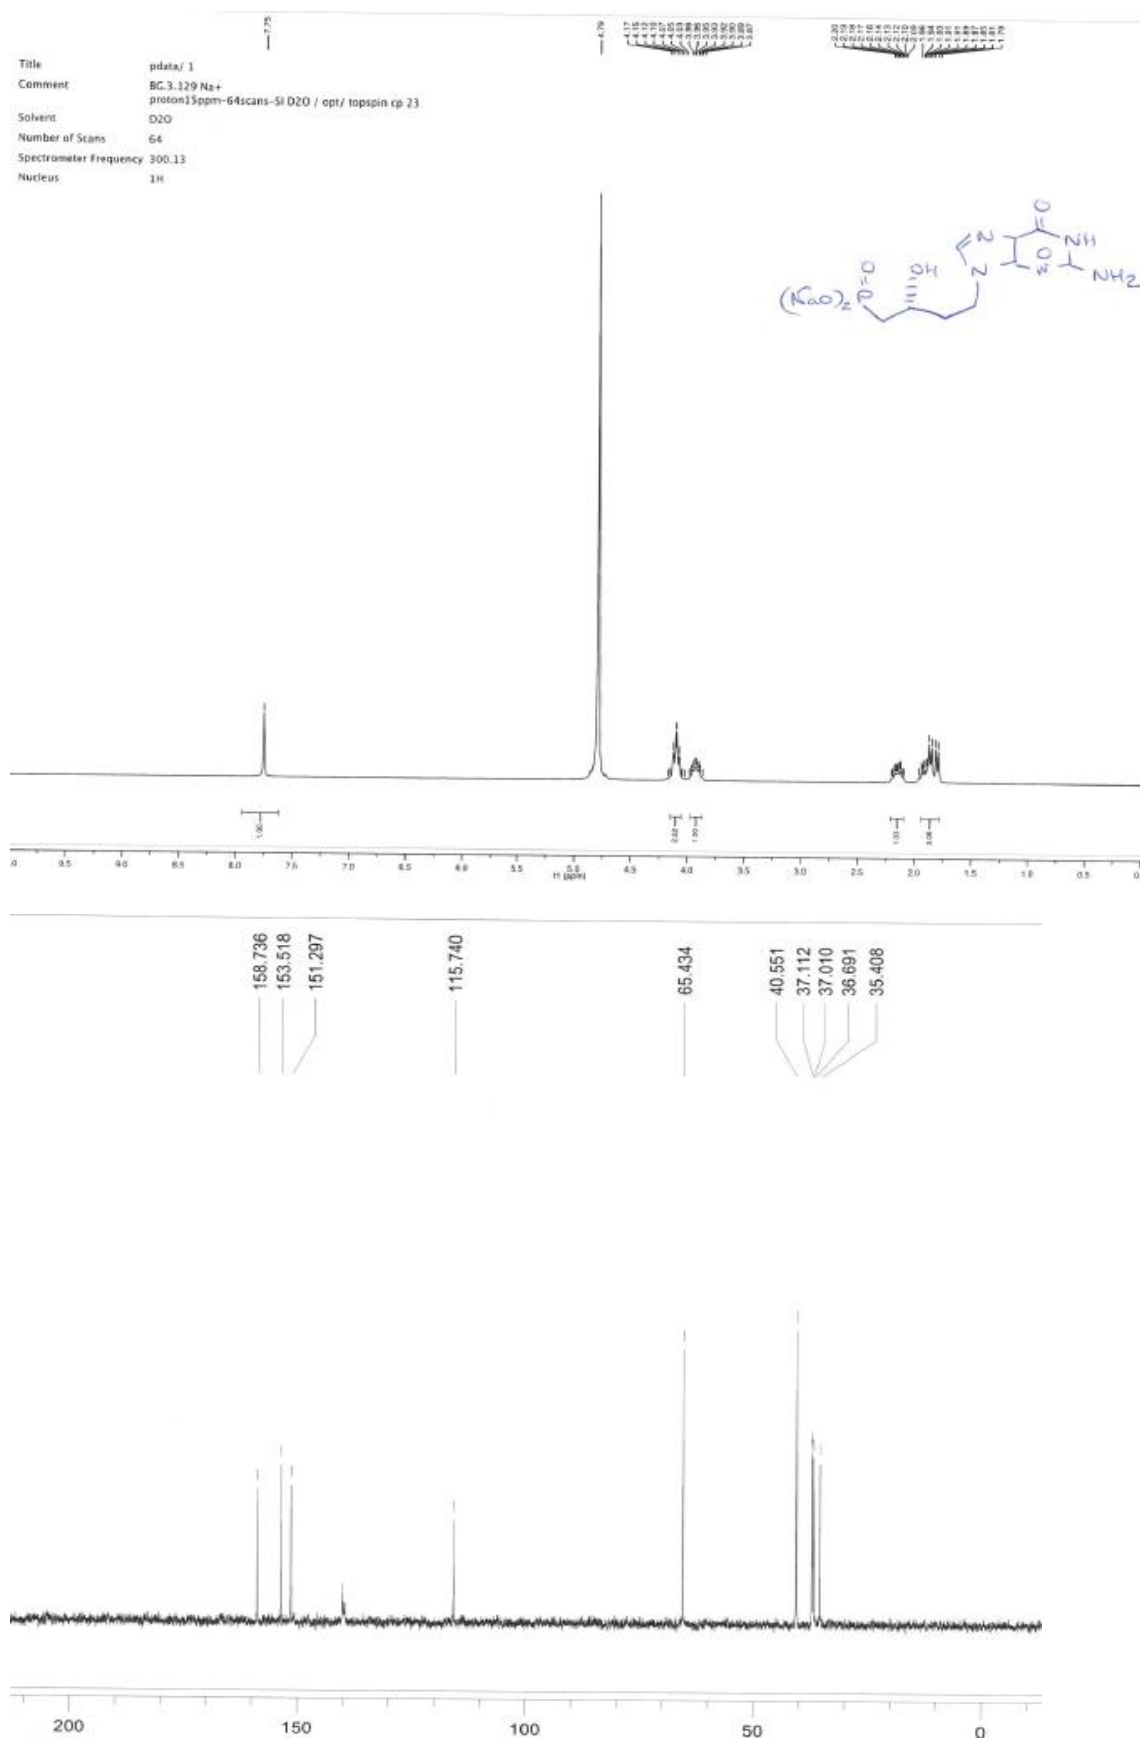

Title pdata/ 1  
 Comment BG3.129 Na+  
 P31dec1H-SI D2O / opt/ topspin cp 23  
 Solvent D2O  
 Number of Scans 128  
 Spectrometer Frequency 121.49  
 Nucleus 31P

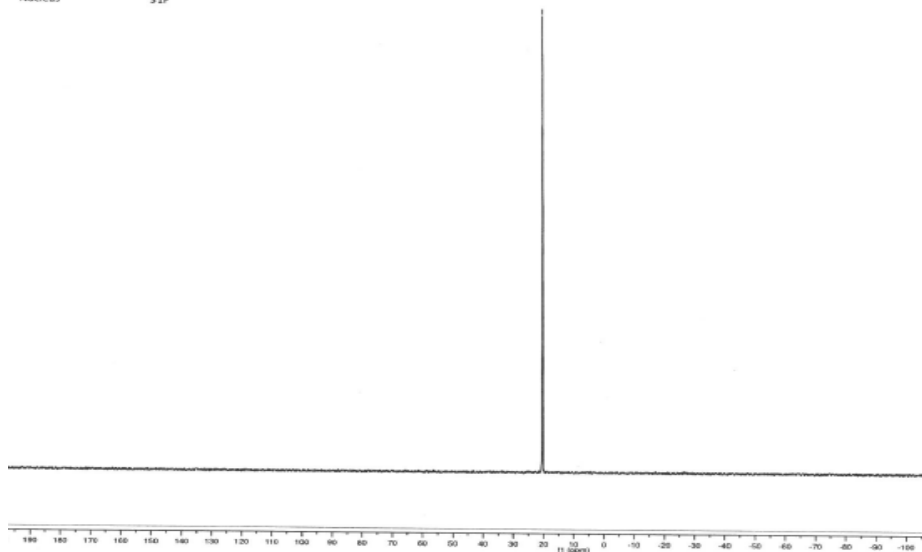

## Elemental Composition Report

Page 1

### Single Mass Analysis

Tolerance = 2.0 PPM / DBE: min = -1.5, max = 50.0  
 Element prediction: Off  
 Number of isotope peaks used for i-FIT = 4

Monoisotopic Mass, Even Electron Ions

489 formula(e) evaluated with 1 results within limits (up to 20 closest results for each mass)

Elements Used:

C: 0-100 H: 0-150 N: 0-50 O: 0-50 P: 1-1

SYNAPT G2-SAMNotSet  
 Y-CP14091712 9 (0.185)

BG3.129

17-Sep-2014  
 1: TOF MS ES+  
 1.58e+006

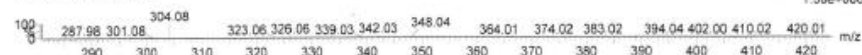

Minimum: -1.5  
 Maximum: 5.0 2.0 50.0

Mass Calc. Mass mDa PPM DBE i-FIT Norm Conf(%) Formula

304.0808 304.0811 -0.3 -1.0 5.5 2937.7 n/a n/a C9 H15 N5 O5 P

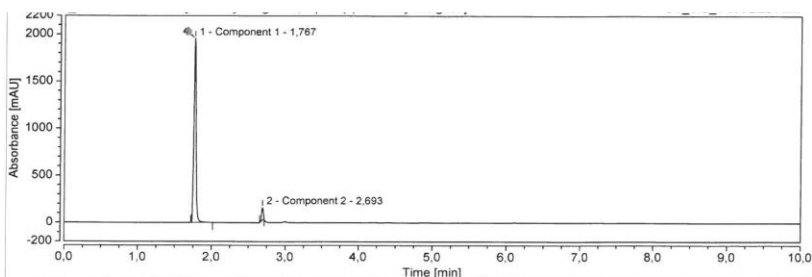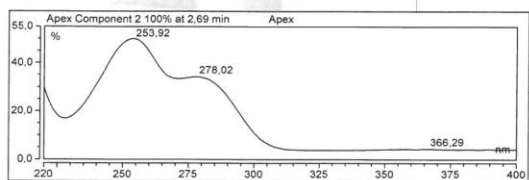

Spectral plot could not be created.  
 No spectra selected.

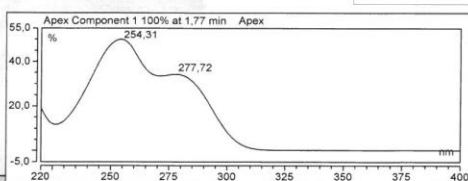

### Integration Results

| No. | Peak Name   | Retention Time<br>min | Area<br>mAU*min | Height<br>mAU | Relative Area<br>% | Relative Height<br>% | Amount |
|-----|-------------|-----------------------|-----------------|---------------|--------------------|----------------------|--------|
| 1   | Component 1 | 1.767                 | 67,869          | 1957,506      | 95.45              | 93.57                | n.a.   |
| 2   | Component 2 | 2.693                 | 3,236           | 134,497       | 4.55               | 6.43                 | n.a.   |

(S)-4-(2-amino-6-oxo-9H-purin-9-yl)-2-hydroxybutyl phosphonic acid (S)-5

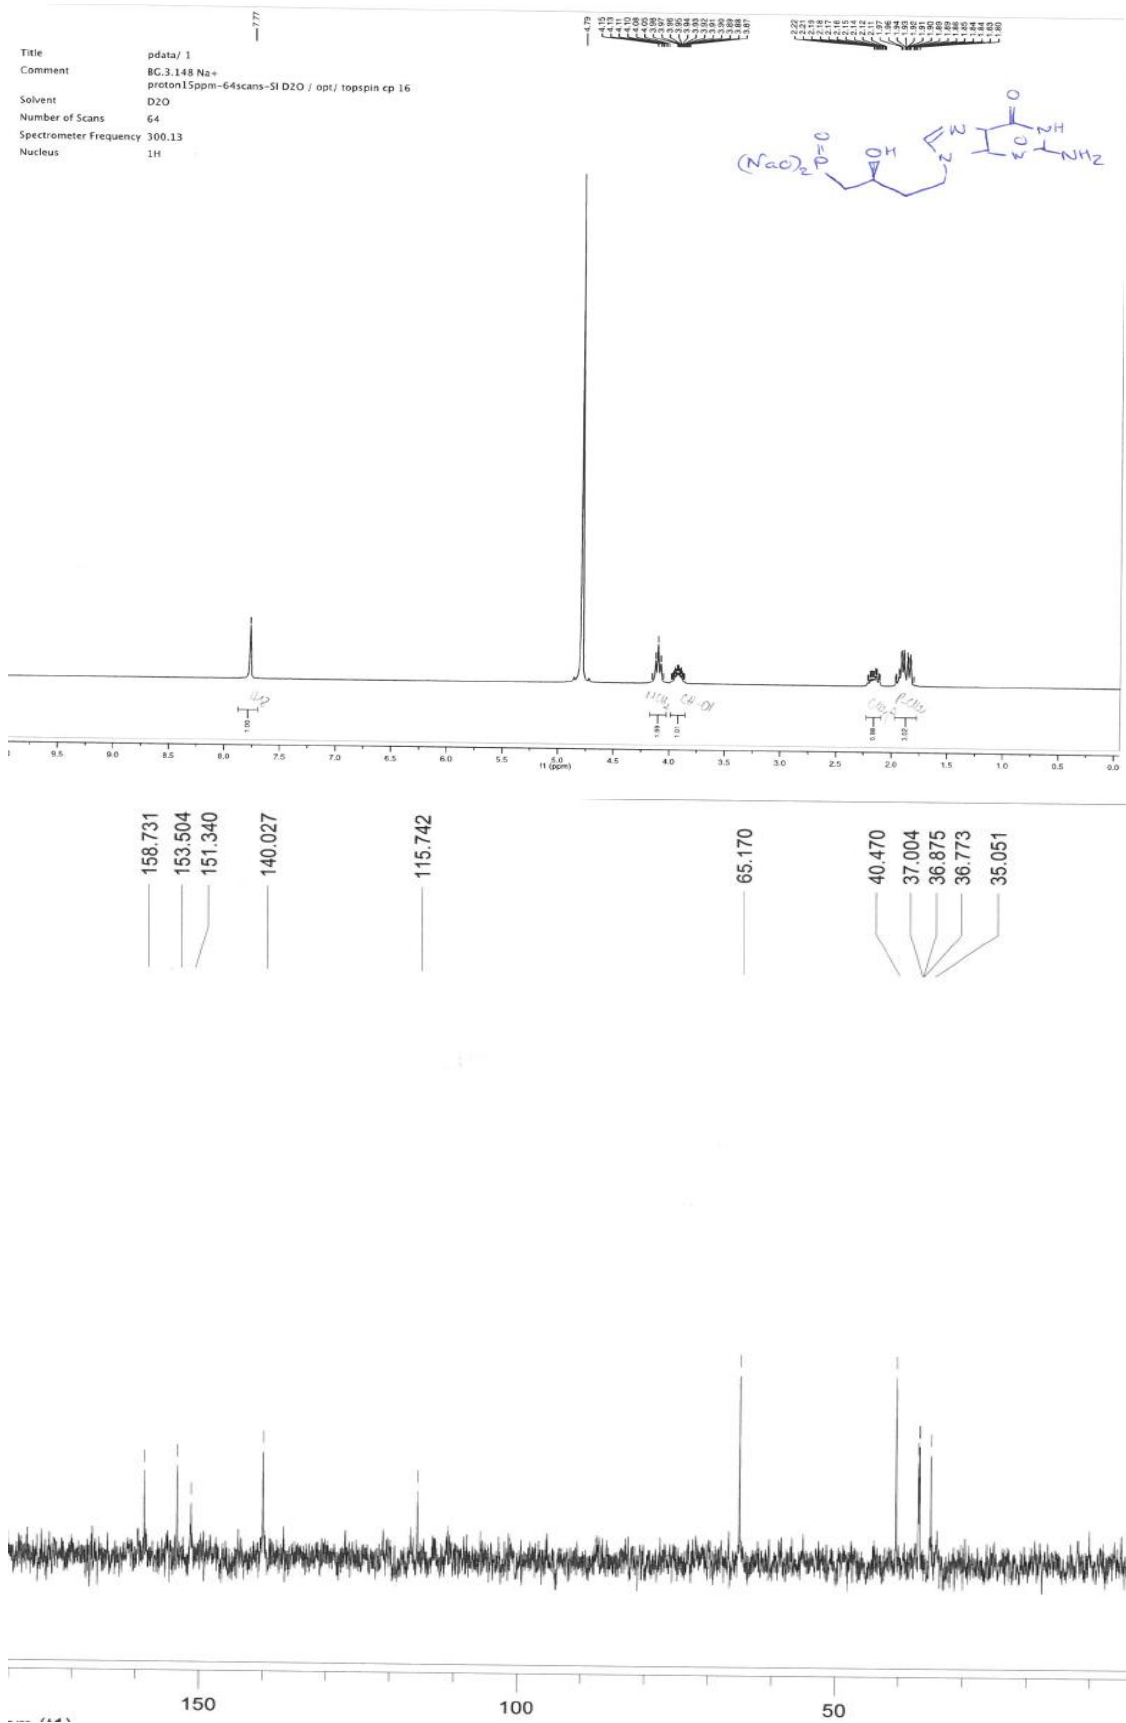



Title pdata/ 1  
 Comment BG3.148 Na+  
 P31dec1H-SI D2O / opt/ topspin cp 16  
 Solvent D2O  
 Number of Scans 128  
 Spectrometer Frequency 121.49  
 Nucleus 31P

3  
 12  
 1

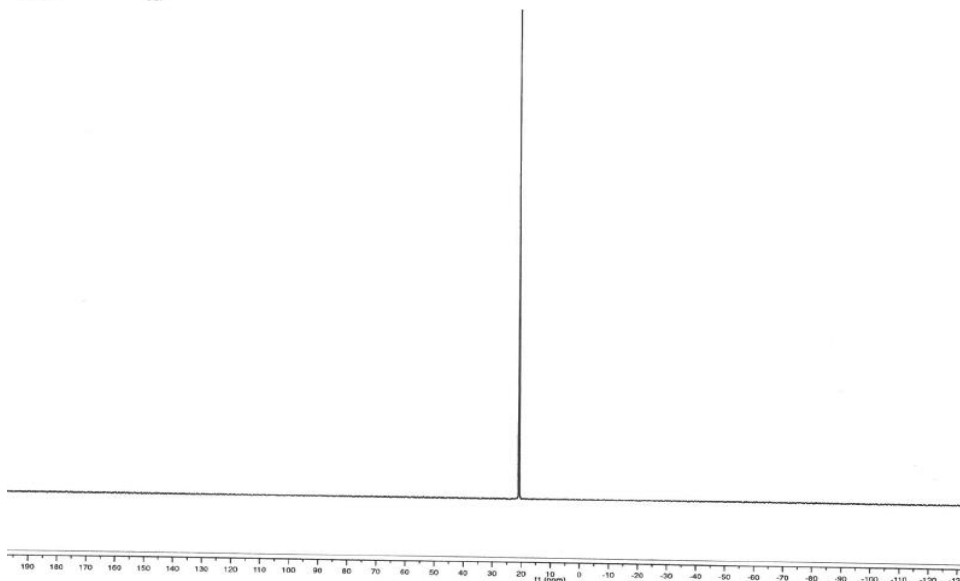

## Elemental Composition Report

Page 1

### Single Mass Analysis

Tolerance = 2.0 PPM / DBE: min = -1.5, max = 50.0

Element prediction: Off

Number of isotope peaks used for i-FIT = 4

Monoisotopic Mass, Even Electron Ions

489 formula(e) evaluated with 1 results within limits (up to 20 closest results for each mass)

Elements Used:

C: 0-100 H: 0-150 N: 0-50 O: 0-50 P: 1-1

SYNAPT G2-S#NotSet

BG3.148

17-Sep-2014

Y-CP14091713 7 (0.143) Cm (7:8)

1. TOF MS ES+

1.29e+006

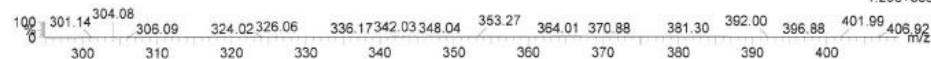

Minimum: -1.5  
 Maximum: 50.0

Mass Calc. Mass mDa PPM DBE i-FIT Norm Conf(%) Formula

304.0813 304.0811 0.2 0.7 5.5 3667.7 n/a n/a C9 H15 N5 O5 P

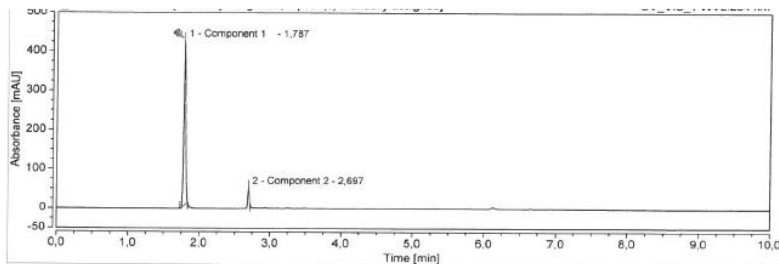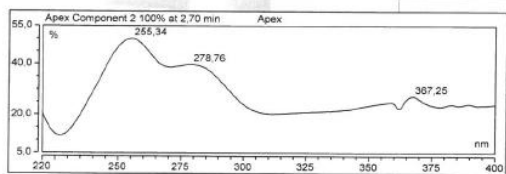

Spectral plot could not be created.  
 No spectra selected.

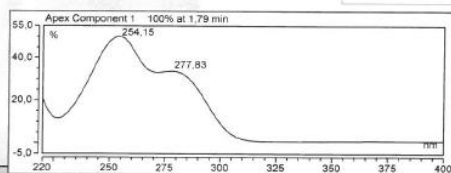

| Integration results |             |                    |              |            |                 |                   |        |
|---------------------|-------------|--------------------|--------------|------------|-----------------|-------------------|--------|
| No.                 | Peak Name   | Retention Time min | Area mAU*min | Height mAU | Relative Area % | Relative Height % | Amount |
| 1                   | Component 1 | 1.787              | 14,129       | 422.531    | 99.07           | 98.23             | n.a.   |
| 2                   | Component 2 | 2.697              | 0,132        | 7,592      | 0,93            | 1,77              | n.a.   |

(R)-(4-(2,6-diamino-9H-purin-9-yl)-2-hydroxybutyl) phosphonic acid (R)-6

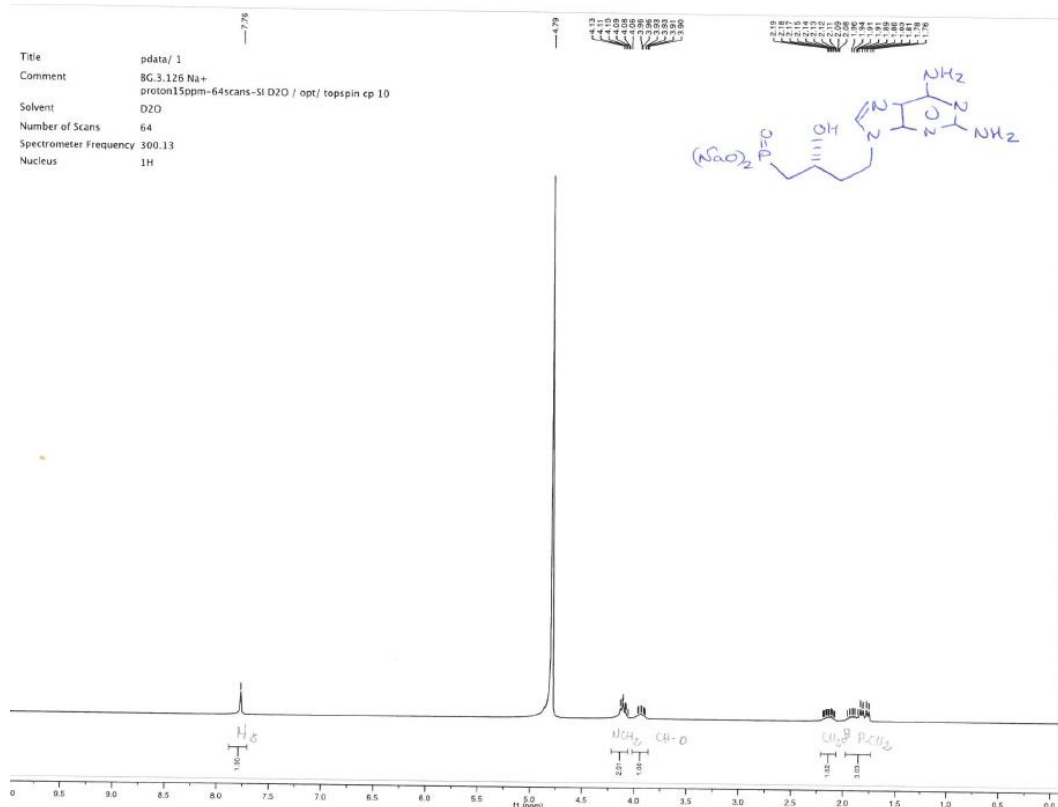

-BG3-113

159.68  
 156.50  
 156.34  
 155.83

140.18

65.65

40.34  
 37.06  
 36.96  
 36.64  
 35.37

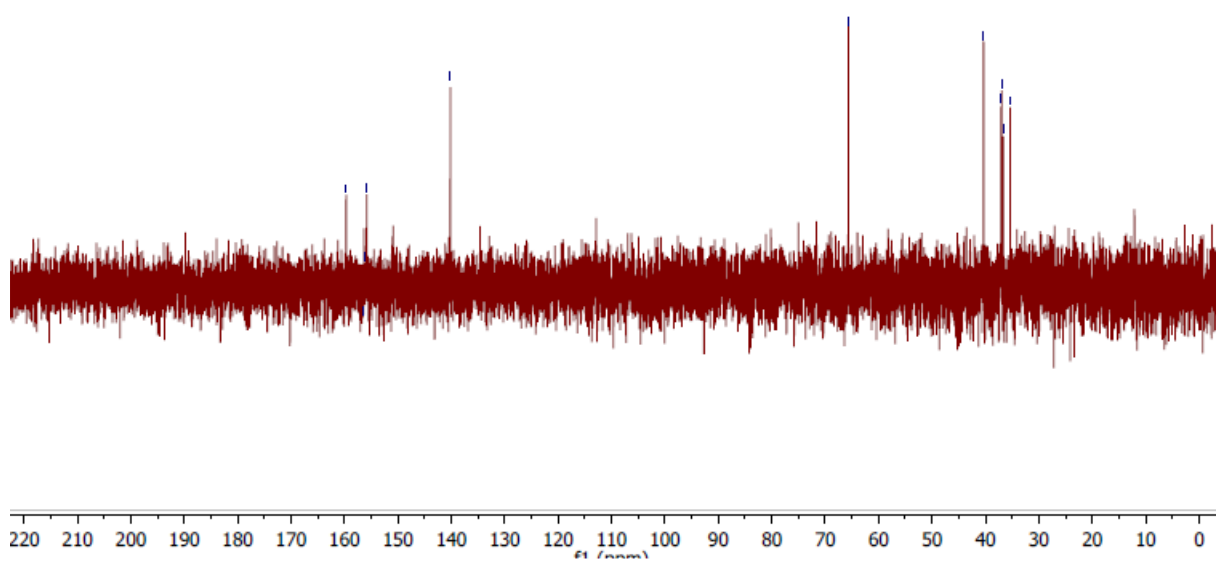

Title pdata/ 1  
 Comment BG 3.126 Na+  
 P31dec1H-SI D2O / opt/ topspin cp 10  
 Solvent D2O  
 Number of Scans 128  
 Spectrometer Frequency 121.49  
 Nucleus 31P

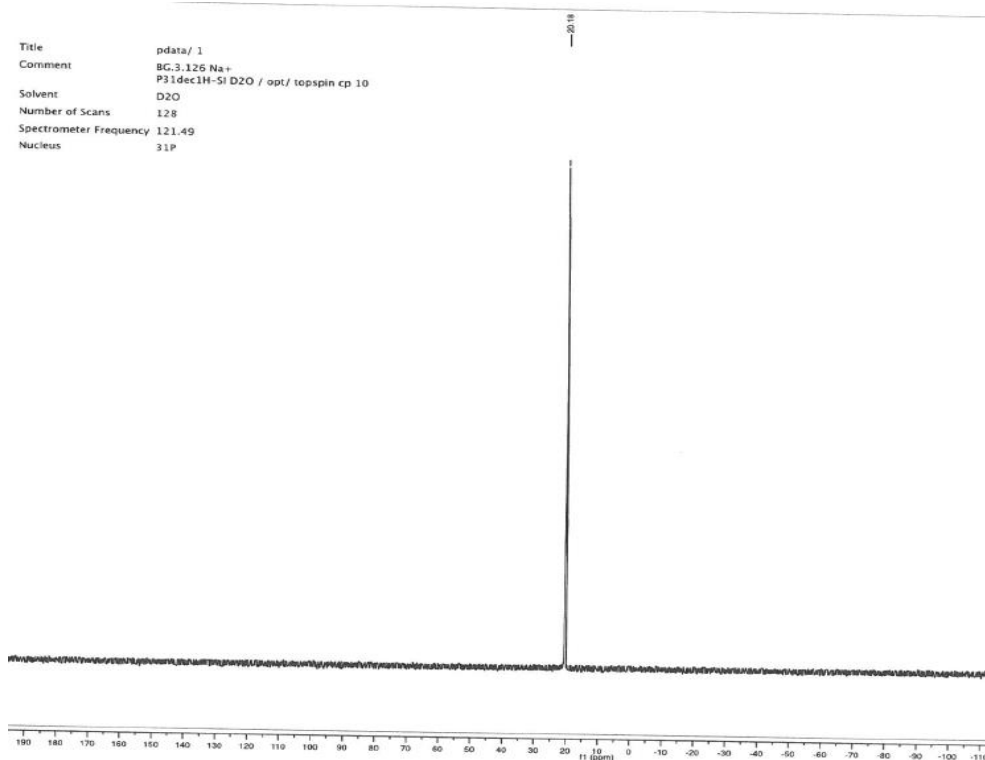

## Elemental Composition Report

Page 1

### Single Mass Analysis

Tolerance = 2.0 PPM / DBE: min = -1.5, max = 50.0

Element prediction: Off

Number of isotope peaks used for i-FIT = 4

Monoisotopic Mass, Even Electron Ions

472 formula(e) evaluated with 1 results within limits (up to 20 closest results for each mass)

Elements Used:

C: 0-100 H: 0-150 N: 0-50 O: 0-50 P: 1-1

SYNAPT G2-S#NotSet

BG3.126

17-Sep-2014

Y-CP14091714 7 (0.143) Cm (6.8)

1: TOF MS ES+

9.17e+005

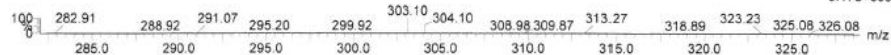

Minimum: -1.5  
 Maximum: 50.0

Mass Calc. Mass mDa FPM DBE i-FIT Norm Conf(%) Formula

303.0968 303.0971 -0.3 -1.0 5.5 4192.1 n/a n/a C9 H16 N6 O4 P

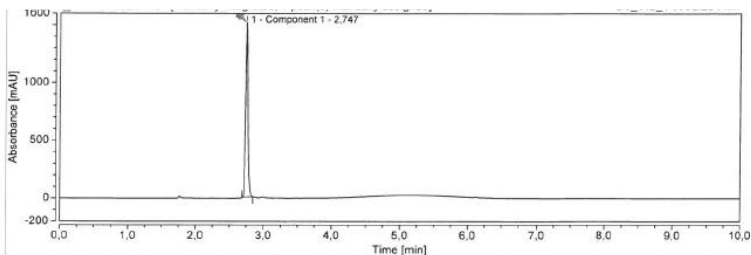

Spectral plot could not be created.  
 No spectra selected.

Spectral plot could not be created.  
 No spectra selected.

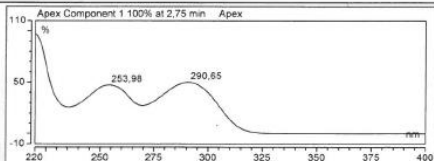

| Integration Results |             |                       |                 |               |                    |                      |
|---------------------|-------------|-----------------------|-----------------|---------------|--------------------|----------------------|
| No.                 | Peak Name   | Retention Time<br>min | Area<br>mAU*min | Height<br>mAU | Relative Area<br>% | Relative Height<br>% |
| n.a.                | Component 2 | n.a.                  | n.a.            | n.a.          | n.a.               | n.a.                 |
| 1                   | Component 1 | 2.747                 | 57.007          | 1511.888      | 100.00             | 100.00               |
|                     |             |                       |                 |               |                    | Amount               |
|                     |             |                       |                 |               |                    | n.a.                 |

(S)-4-(2,6-diamino-9H-purin-9-yl)-2-hydroxybutyl phosphonic acid (S)-6

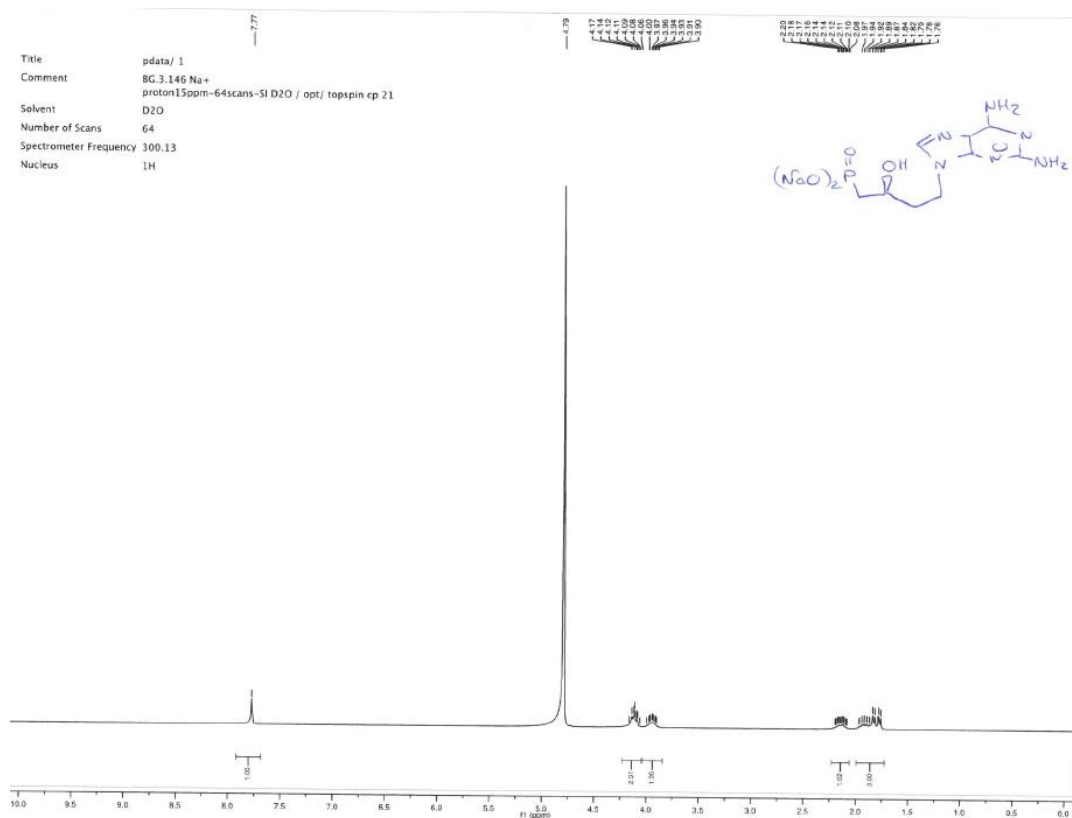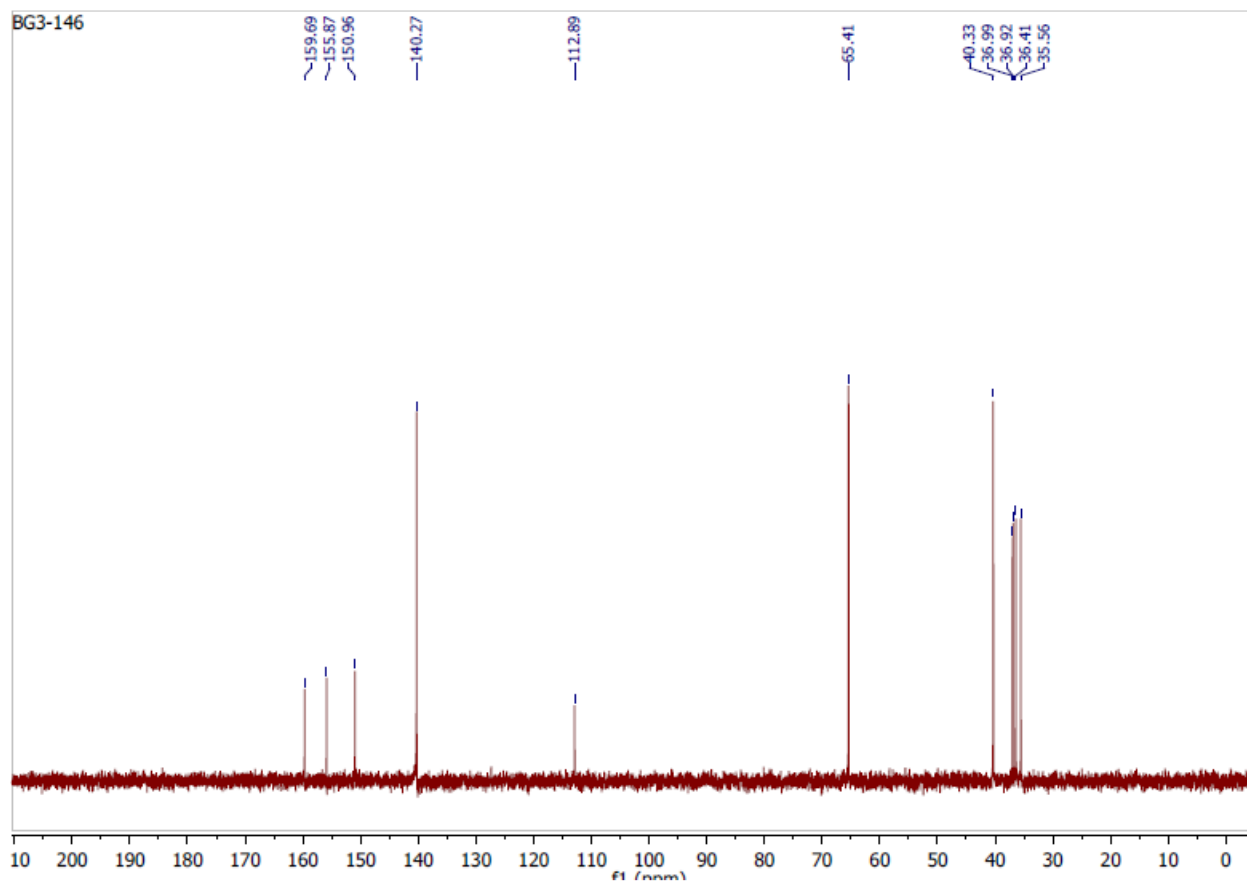

Title pdata/ 1  
 Comment BG 3.146 Na+  
 P31dec1H-SI D2O / opt/ topspin cp 21  
 Solvent D2O  
 Number of Scans 128  
 Spectrometer Frequency 121.49  
 Nucleus 31P

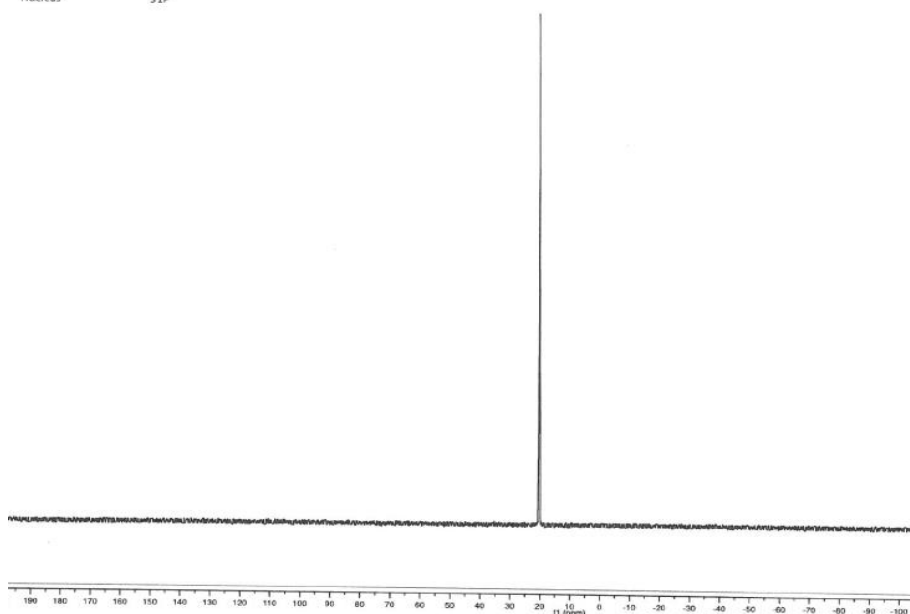

## Elemental Composition Report

Page 1

### Single Mass Analysis

Tolerance = 1.0 PPM / DBE: min = -1.5, max = 50.0

Element prediction: Off

Number of isotope peaks used for i-FIT = 4

Monoisotopic Mass, Odd and Even Electron Ions

472 formula(e) evaluated with 1 results within limits (up to 20 closest results for each mass)

Elements Used:

C: 0-100 H: 0-100 N: 0-50 O: 0-50 P: 1-1

SYNAPT G2-S#NotSet

BQ3.146

24-Sep-2014

1: TOF MS ES+

4.47e+004

Y-CP14092401 17 (0.329)

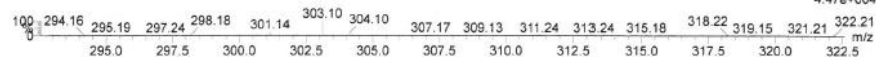

Minimum:

-1.5

Maximum:

1.0 1.0 50.0

Mass Calc. Mass mDa PPM DBE i-FIT Norm Conf(%) Formula

303.0971 303.0971 0.0 0.0 5.5 2146.2 n/a n/a C9 H16 N6 O4 P

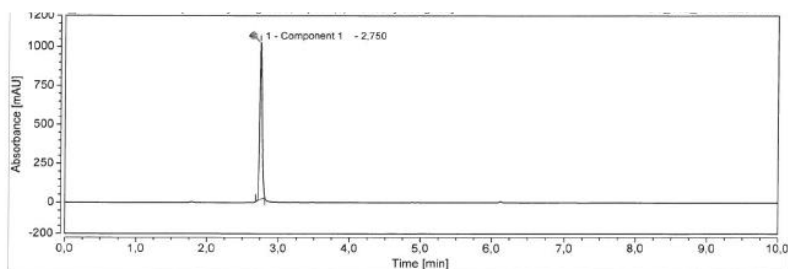

Spectral plot could not be created.

No spectra selected.

Spectral plot could not be created.

No spectra selected.

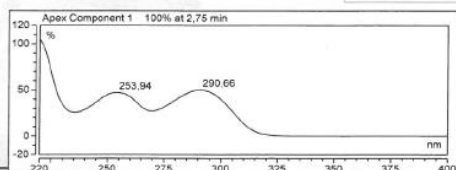

| Integration Results |             |                    |              |            |                 |                   |        |
|---------------------|-------------|--------------------|--------------|------------|-----------------|-------------------|--------|
| No.                 | Peak Name   | Retention Time min | Area mAU*min | Height mAU | Relative Area % | Relative Height % | Amount |
| n.a.                | Component 2 | n.a.               | n.a.         | n.a.       | n.a.            | n.a.              | n.a.   |
| 1                   | Component 1 | 2.750              | 35,985       | 1007,402   | 100,00          | 100,00            | n.a.   |

(R)-(2-hydroxy-4-(6-oxo-1,6-dihydro-9H-purin-9-yl)butyl)phosphonic acid disodic salt (R)-7

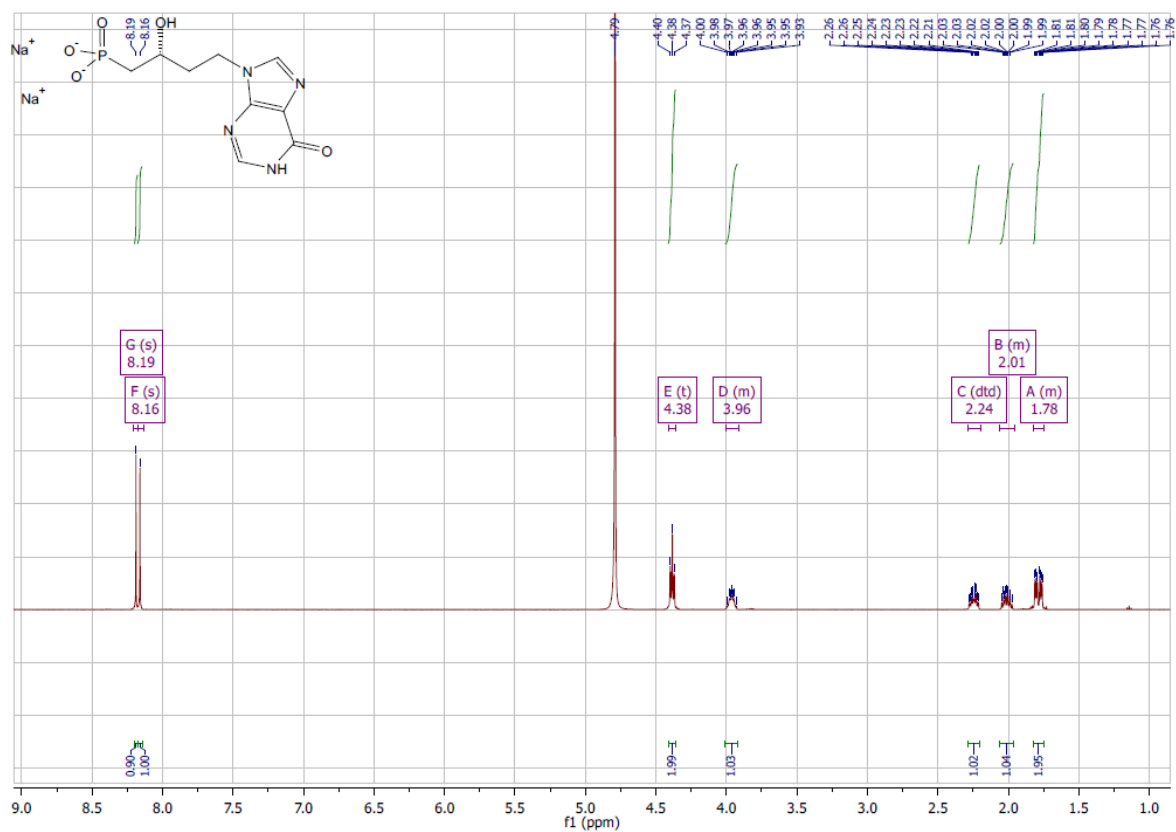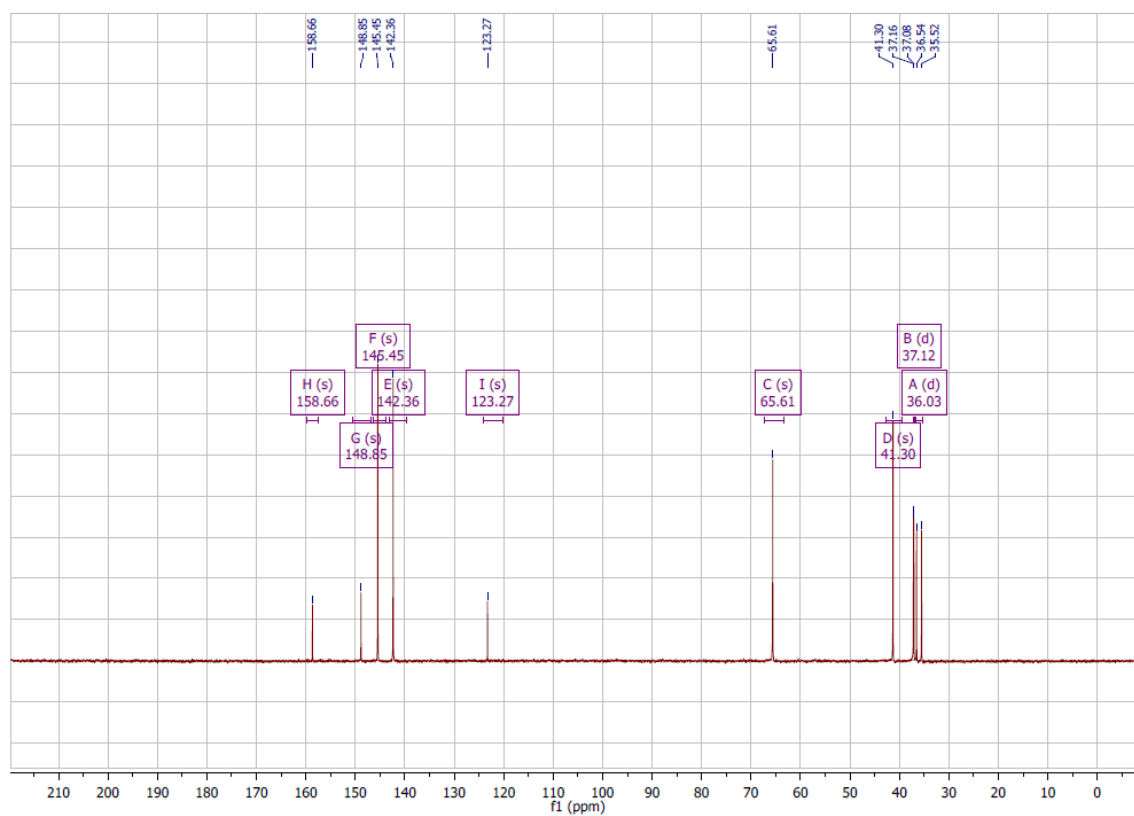

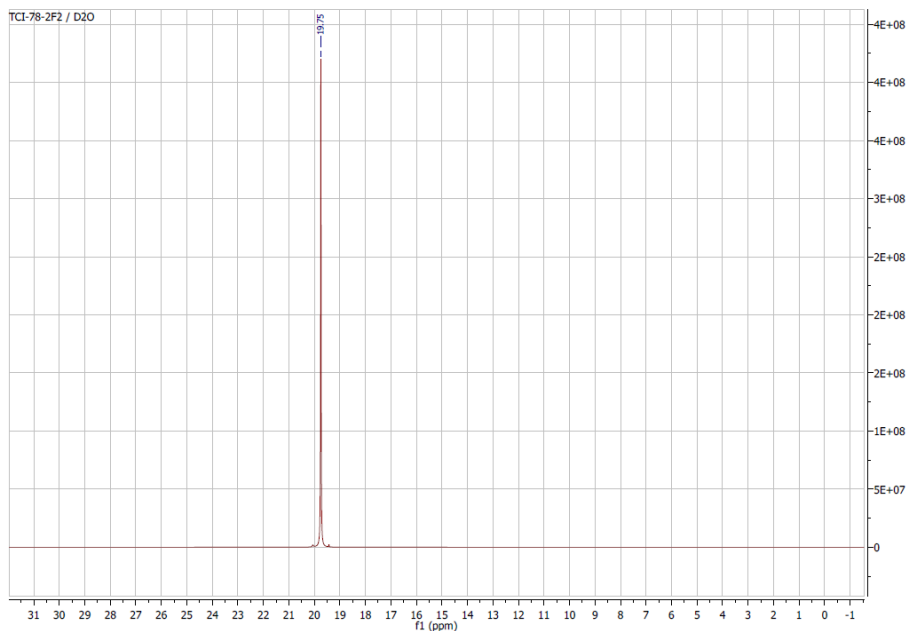

## Elemental Composition Report

Page 1

### Single Mass Analysis

Tolerance = 1.0 PPM / DBE: min = -10.0, max = 100.0

Element prediction: Off

Number of isotope peaks used for i-FIT = 3

Monoisotopic Mass, Even Electron Ions

1299 formula(e) evaluated with 1 results within limits (all results (up to 1000) for each mass)

Elements Used:

C: 1-100 H: 0-100 N: 0-20 O: 0-20 Na: 0-2 P: 1-1

SYNAPT G2-SiUEB205

Y-CP17040502 3 (0.161) Cm (3.4)

TCI-78-2f2

05-Apr-2017

1: TOF MS ES-

2.36e+005

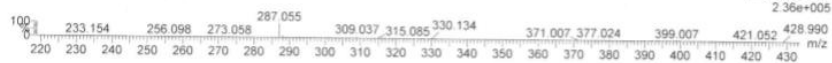

Minimum:

Maximum:

10.0

1.0

-10.0

100.0

Mass Calc. Mass mDa PPM DBE i-FIT Norm Conf(%) Formula

287.0547 287.0545 0.2 0.7 6.5 1018.4 n/a n/a C<sup>9</sup> H<sup>12</sup> N<sup>4</sup> O<sup>5</sup> P

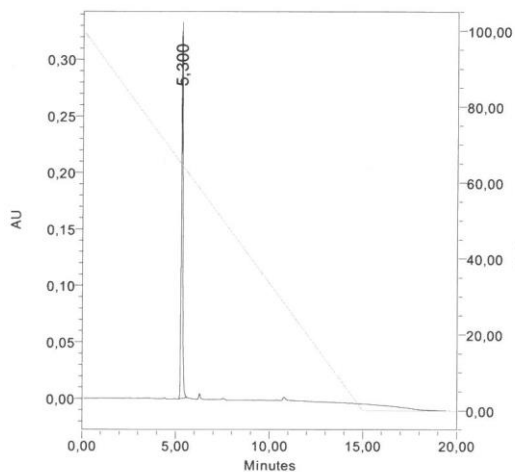

Acq Method Set grad 20mn T3

Processing Method grad 20mn T3

SampleName: tc1-78-2f2 dowex

Lambda Extract Wvln Ch1

Injection Volume 3.00 ul

Vial 74

Run Time 20.0 Minutes

### Processed Results

| RT    | Area    | % Area | Height | % Height |
|-------|---------|--------|--------|----------|
| 1 5.3 | 1821874 | 100.0  | 325350 | 100.00   |

### Spectrum Index Plot

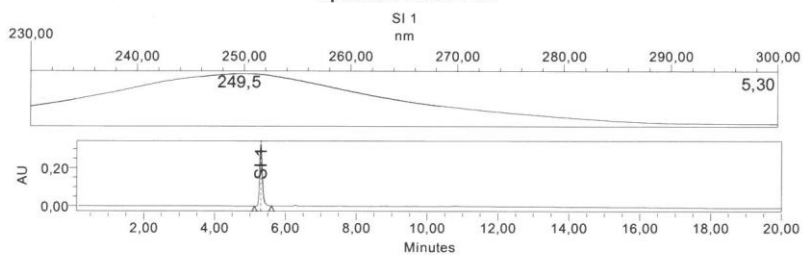

(S)-(2-hydroxy-4-(6-oxo-1,6-dihydro-9H-purin-9-yl)butyl) phosphonic acid disodic salt (S)-7

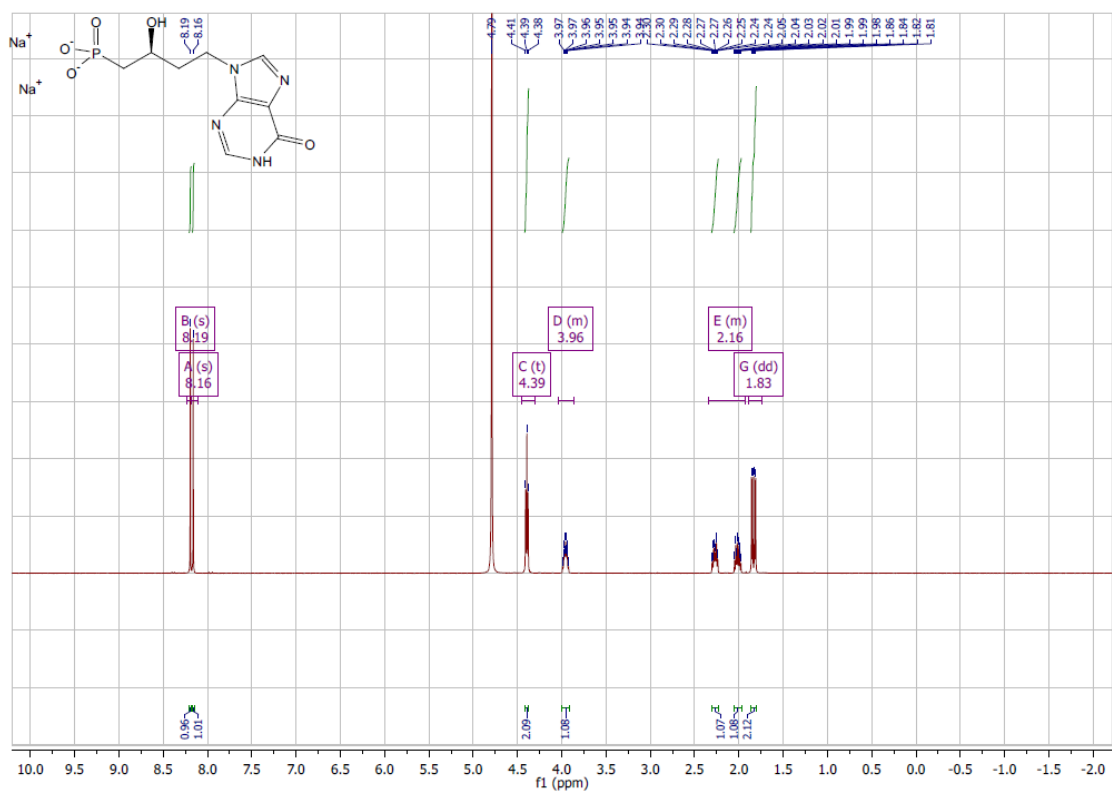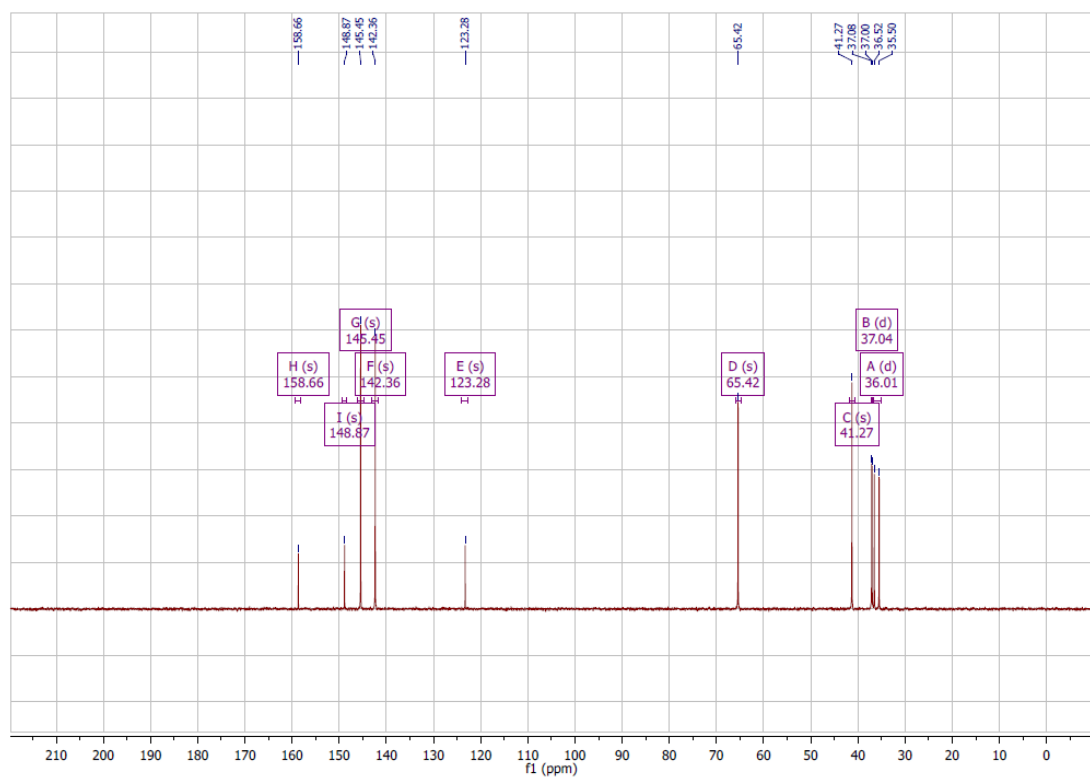



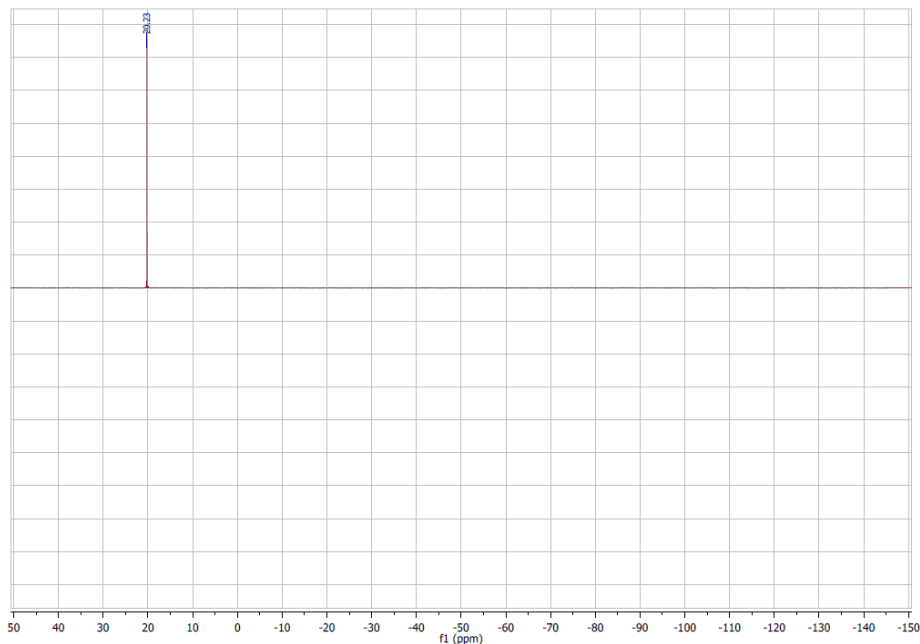

# Elemental Composition Report

Page 1

## Single Mass Analysis

Tolerance = 1.0 mDa / DBE: min = -10.0, max = 100.0

Element prediction: Off

Number of isotope peaks used for i-FIT = 3

Monoisotopic Mass, Even Electron Ions

548 formula(e) evaluated with 1 results within limits (all results (up to 1000) for each mass)

Elements Used:

C: 1-100 H: 0-20 N: 0-20 O: 0-20 P: 1-1

SYNAPT G2-S#UEB205

Y-JM17032901 3 (0.141) Cm (3)

TCI-72F1

29-Mar-2017

1: TOF MS ES+

4.10e+006

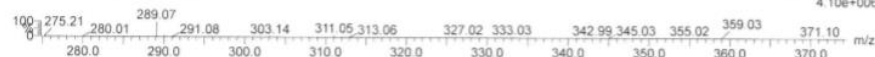

Minimum: -10.0  
Maximum: 1.0 1.0 100.0

| Mass     | Calc. Mass | mDa | PPM | DBE | i-FIT  | Norm | Conf(%) | Formula        |
|----------|------------|-----|-----|-----|--------|------|---------|----------------|
| 289.0703 | 289.0702   | 0.1 | 0.3 | 5.5 | 1988.3 | n/a  | n/a     | C9 H14 N4 O5 P |

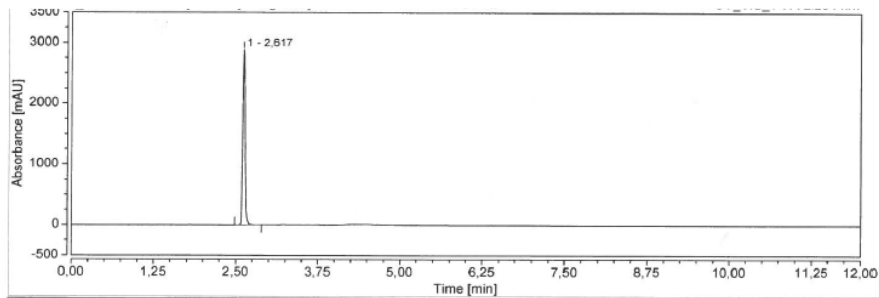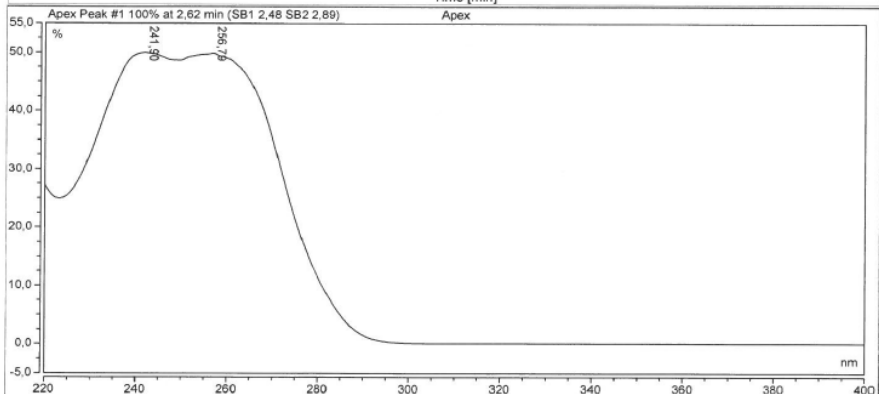

| No. | Peak Name | Retention Time min | Area mAU*min | Height mAU | Relative Area % | Relative Height % | Amount |
|-----|-----------|--------------------|--------------|------------|-----------------|-------------------|--------|
| 1   |           | 2.617              | 127.623      | 2885.441   | 100.00          | 100.00            | n.a.   |

(R)-(4-(2,6-dioxo-1,2,3,6-tetrahydro-9H-purin-9-yl)-2-hydroxybutyl)phosphonic acid disodic salt (R)-8

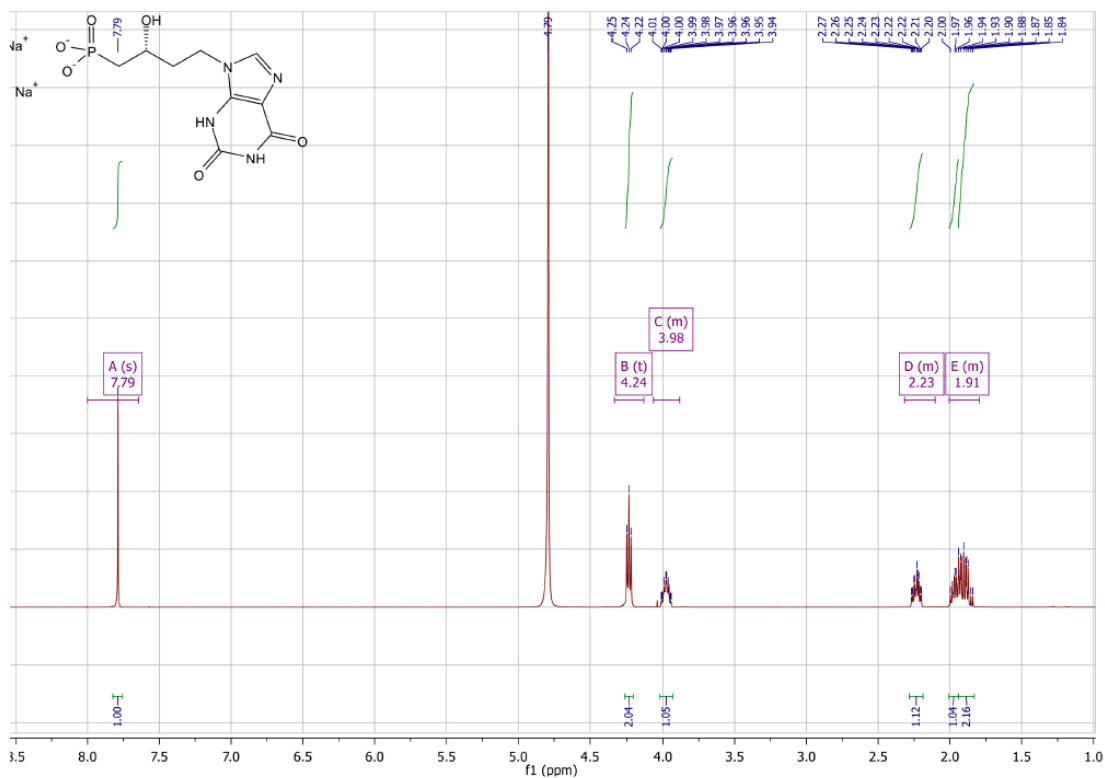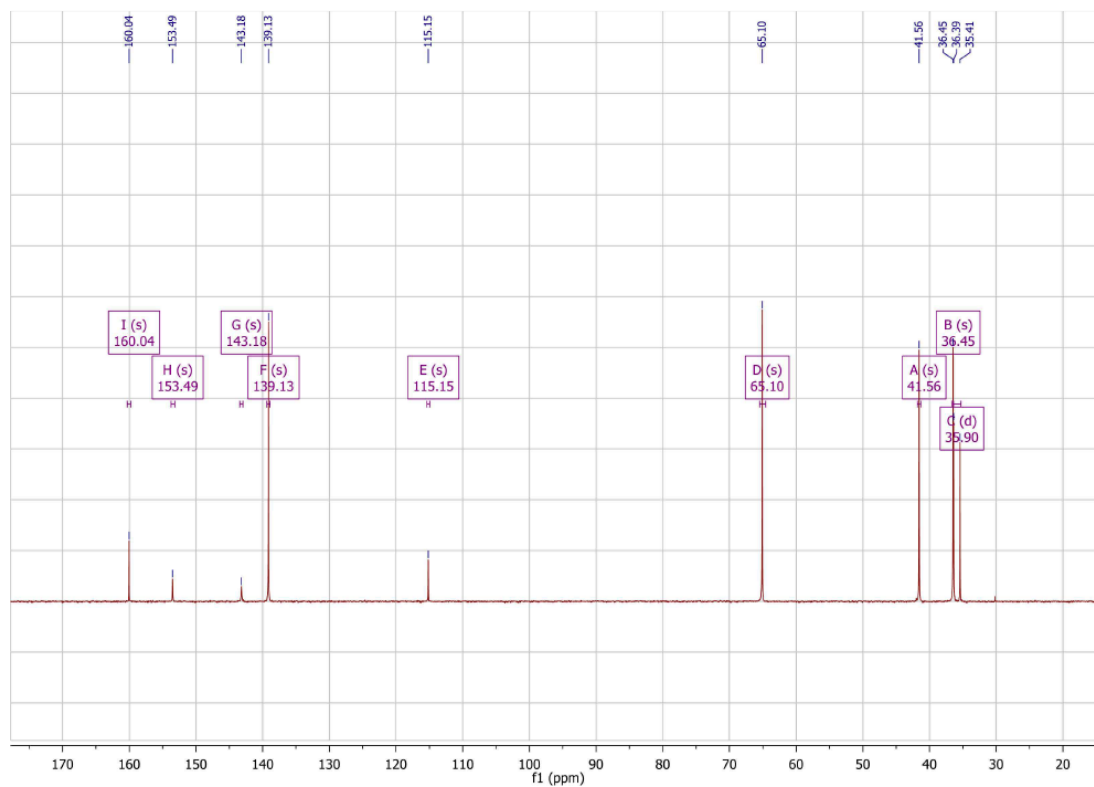

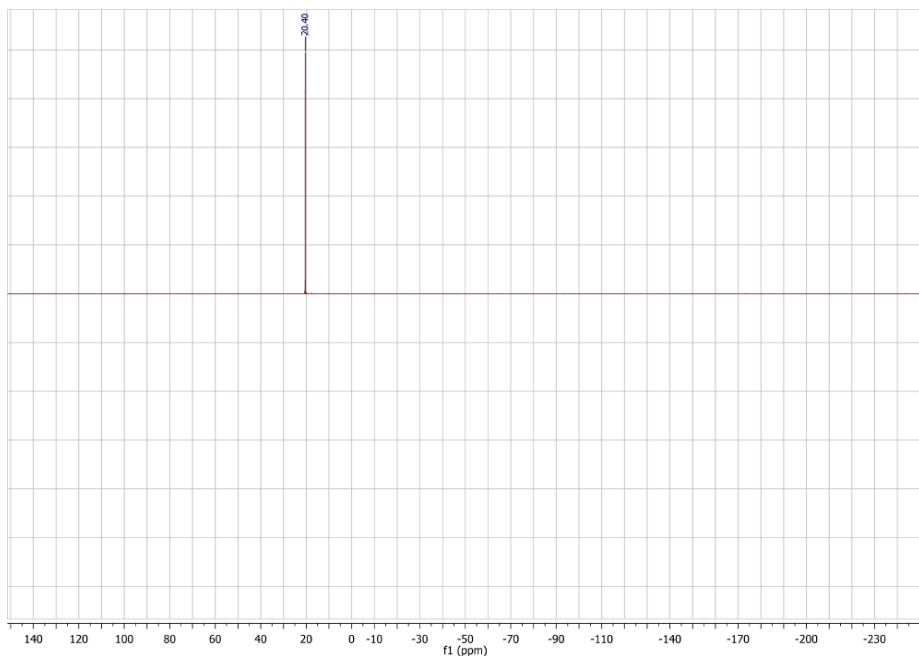

# Elemental Composition Report

Page 1

## Single Mass Analysis

Tolerance = 1.0 mDa / DBE: min = -10.0, max = 100.0

Element prediction: Off

Number of isotope peaks used for i-FIT = 3

Monoisotopic Mass, Even Electron Ions

642 formula(e) evaluated with 1 results within limits (all results (up to 1000) for each mass)

Elements Used:

C: 0-100 H: 0-100 N: 0-20 O: 0-20 P: 1-1 Na: 2-2

SYNAPT G2-S#UEB205

TCI-67

10-Mar-2017

Y-CP17031001 4 (0.175) Cm (4.5-(1.2+8.11))

1: TOF MS ES+

1.35e+006

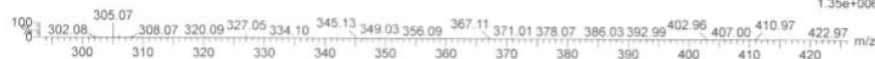

Minimum: -10.0  
Maximum: 1.0 1.0 100.0

| Mass     | Calc. Mass | mDa  | PPM  | DBE | i-FIT | Norm | Conf(%) | Formula            |
|----------|------------|------|------|-----|-------|------|---------|--------------------|
| 349.0289 | 349.0290   | -0.1 | -0.3 | 5.5 | 890.7 | n/a  | n/a     | C9 H12 N4 O6 F Na2 |

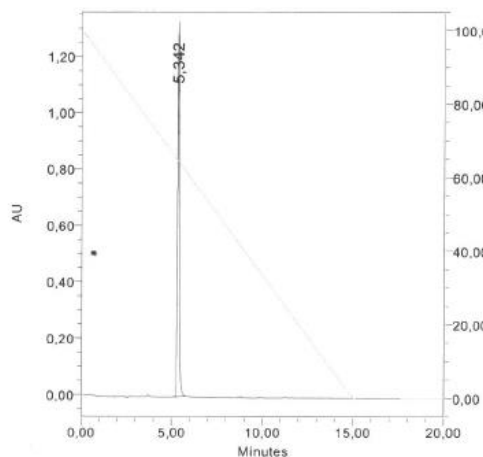

Acq Method Set grad 20mn T3

Processing Method grad 20mn T3

SampleName: tc1-67f3c

Lambda Extract Wvln Ch1

Injection Volume 10.00 ul

Vial 44

Run Time 20.0 Minutes

## Processed Results

| RT    | Area    | % Area | Height  | % Height |
|-------|---------|--------|---------|----------|
| 1 5.3 | 8233273 | 100.0  | 1298974 | 100.00   |

## Spectrum Index Plot

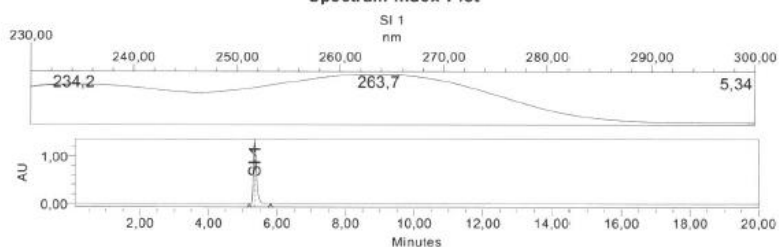

(S)-(4-(2,6-dioxo-1,2,3,6-tetrahydro-9H-purin-9-yl)-2-hydroxybutyl)phosphonic acid disodium salt (S)-8

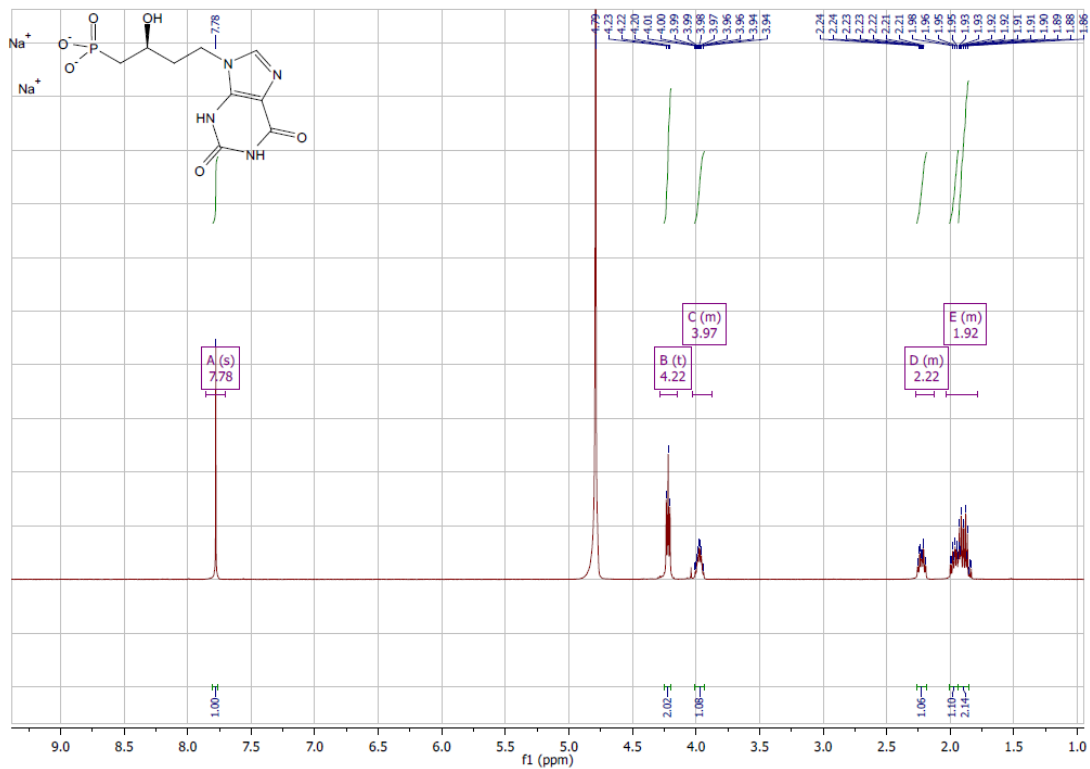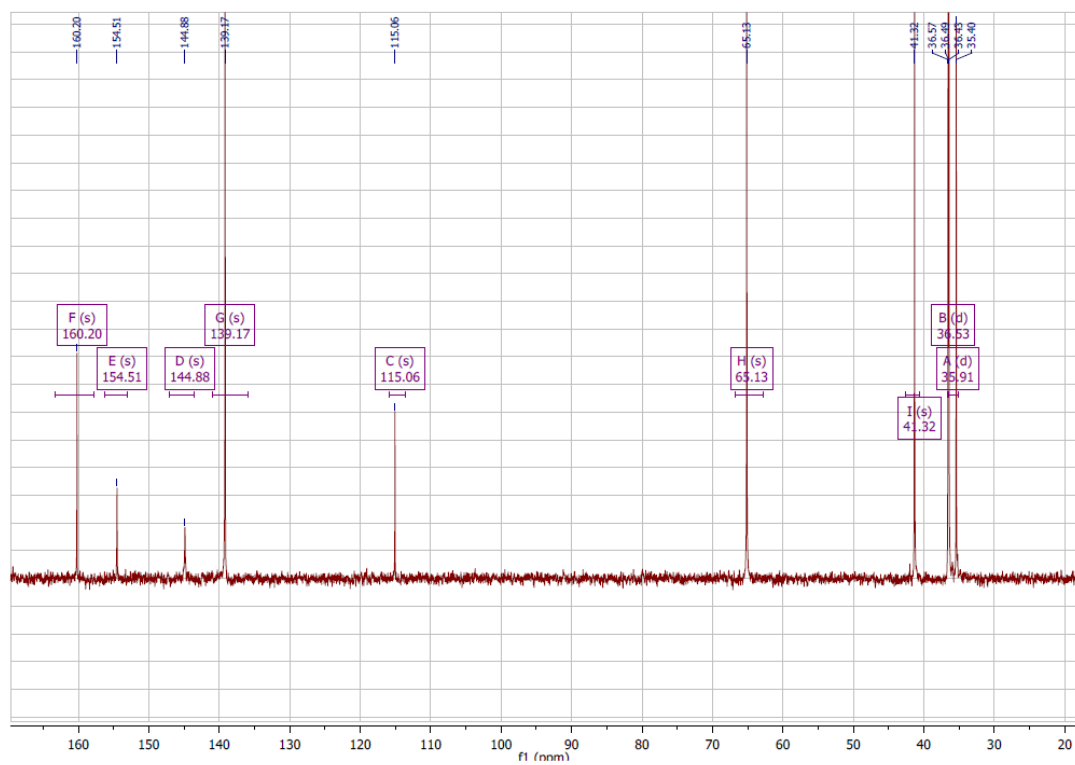

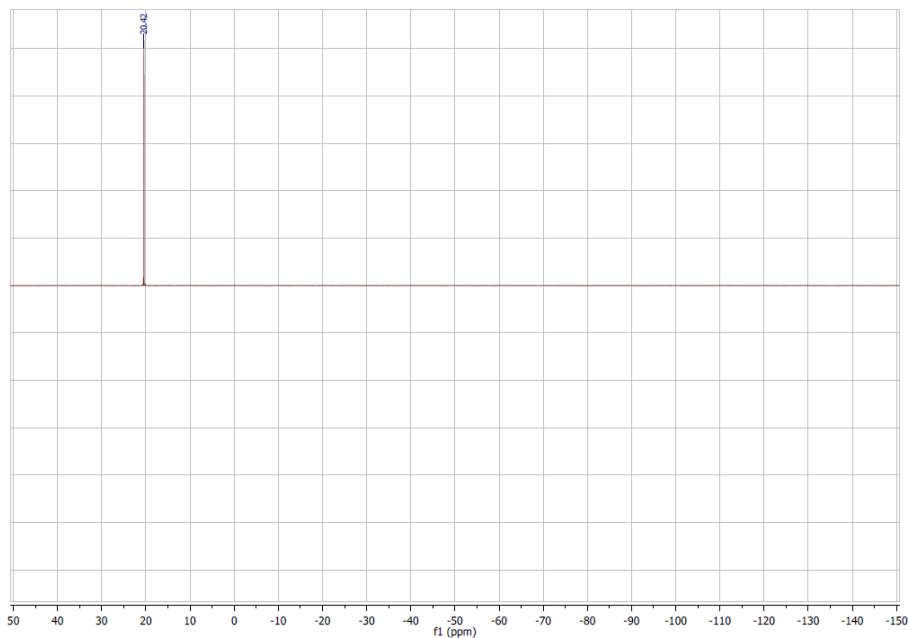

# Final Composition Report

Page 1

## Mass Analysis

Mass = 1.0 mDa / DBE: min = -10.0, max = 100.0

Isotope prediction: Off

Number of isotope peaks used for i-FIT = 3

Monoisotopic Mass, Even Electron Ions

05 formula(e) evaluated with 1 results within limits (all results (up to 1000) for each mass)

Elements Used:

C: 1-100 H: 0-100 N: 0-20 O: 0-20 Na: 2-2 P: 1-1

SYNAPT G2-S#UEB205

TCI-70-2 F3

Y-CP17033101 3 (0.141) Cm (3)

31-Mar-2017

1: TOF MS ES+

3.56e+006

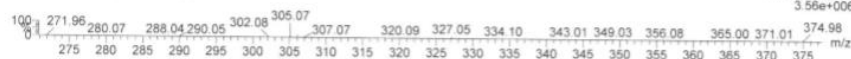

Minimum: -10.0  
Maximum: 100.0

| Mass     | Calc. Mass | mDa | PPM | DBE | i-FIT | Norm | Conf(%) | Formula            |
|----------|------------|-----|-----|-----|-------|------|---------|--------------------|
| 349.0291 | 349.0290   | 0.1 | 0.3 | 5.5 | 948.0 | n/a  | n/a     | C9 H12 N4 O6 Na2 P |

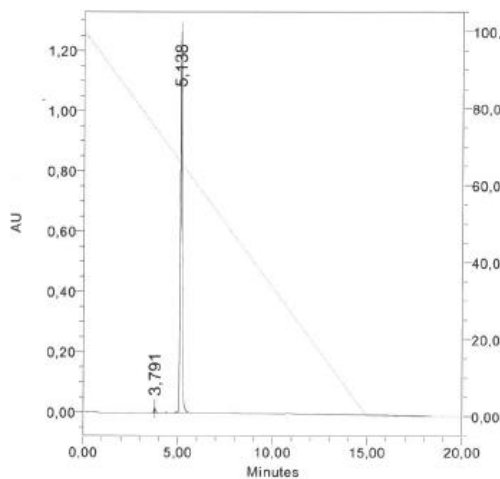

Acq Method Set grad 20mn T3

Processing Method grad 20mn T3

SampleName: tc1-70-2f3b

Lambda Extract Wvin Ch1

Injection Volume 2.00 ul

Vial 10

Run Time 20.0 Minutes

## Processed Results

| RT    | Area    | % Area | Height  | % Height |
|-------|---------|--------|---------|----------|
| 1 3.8 | 147006  | 1.8    | 15220   | 1.18     |
| 2 5.1 | 7873144 | 98.2   | 1274073 | 98.82    |

## Spectrum Index Plot

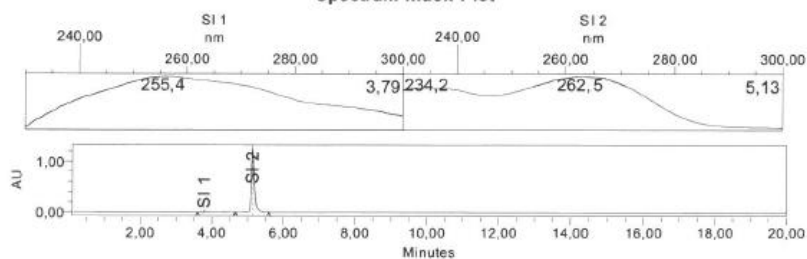

(R)-(4-(2-amino-9H-purin-9-yl)-2-hydroxybutyl) phosphonic acid (R)-9

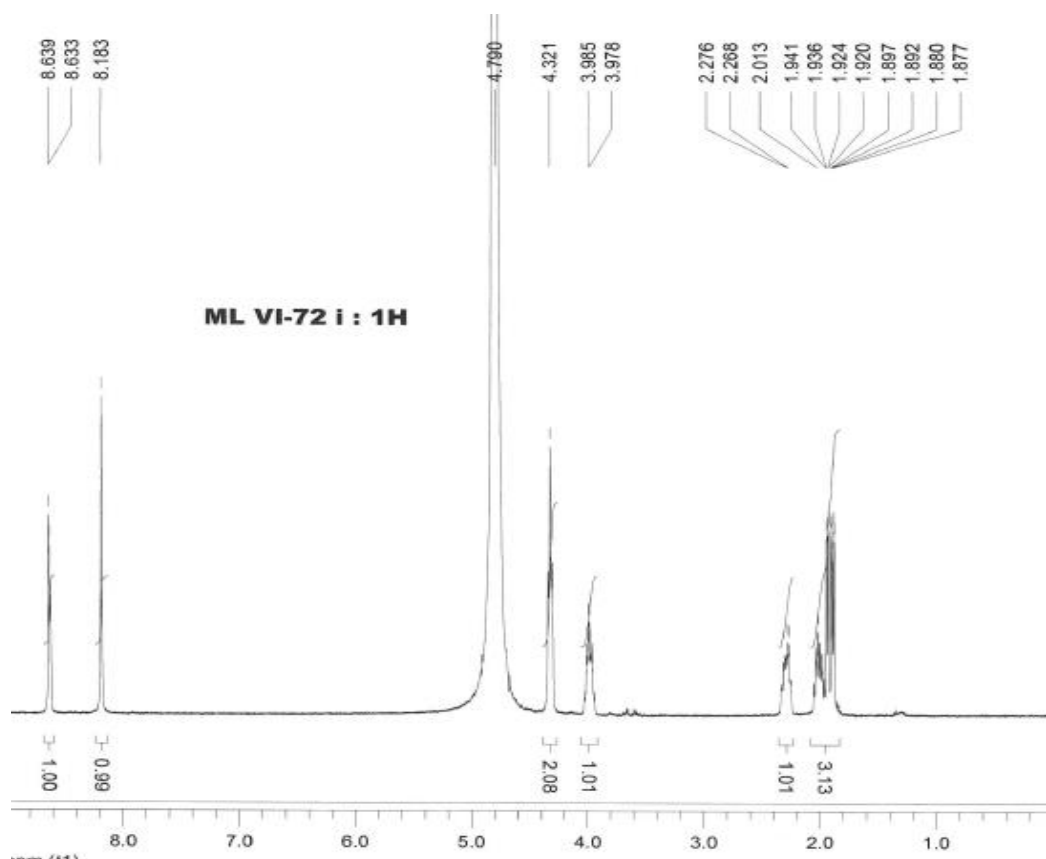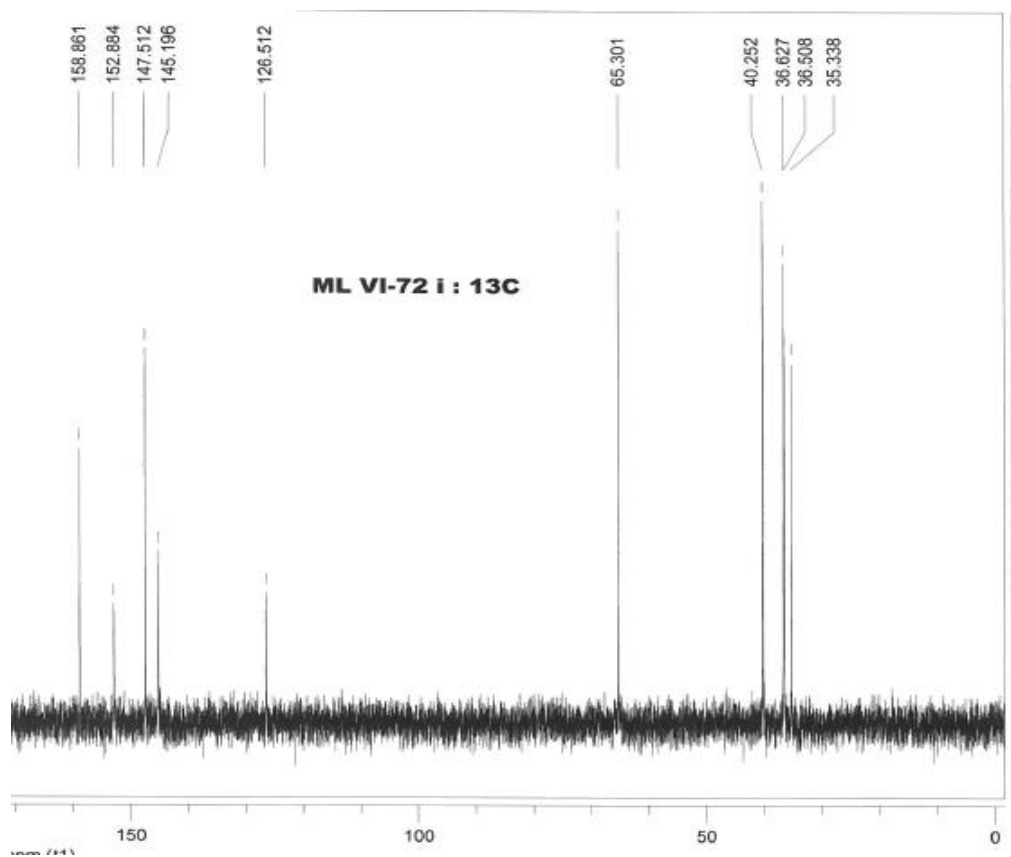

ML VI-72 i : 31P

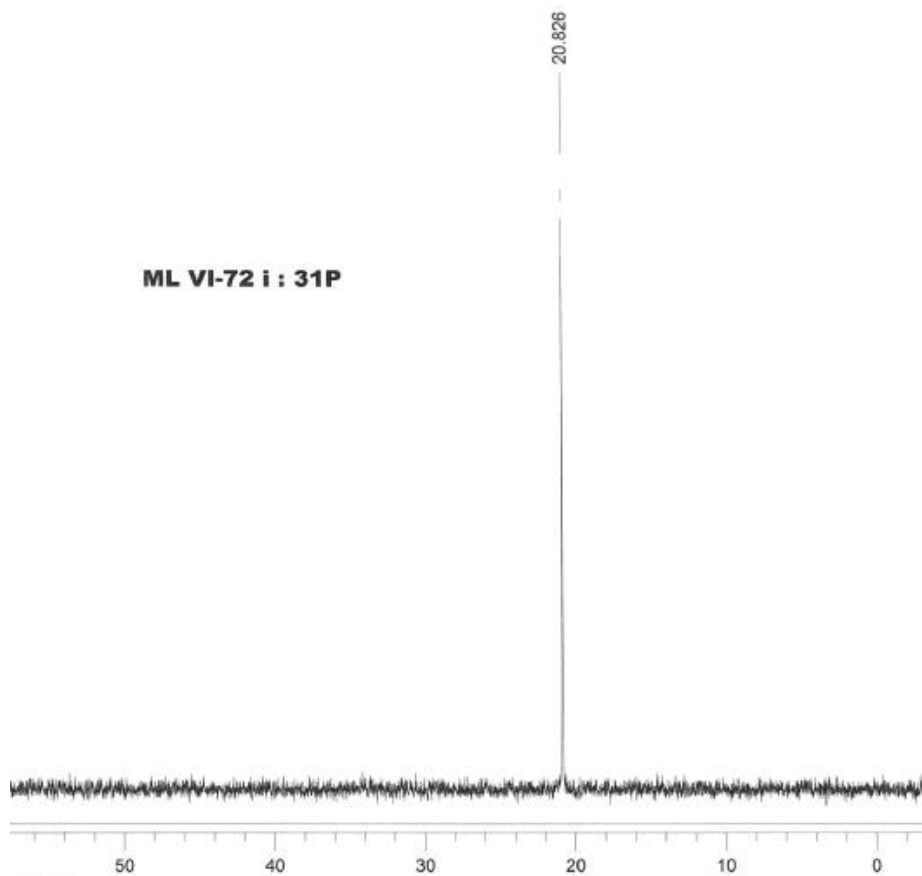

# Elemental Composition Report

Page 1

## Single Mass Analysis

Tolerance = 3.0 PPM / DBE: min = -1.5, max = 50.0

Element prediction: Off

Number of isotope peaks used for i-FIT = 3

Monoisotopic Mass, Even Electron Ions

917 formula(e) evaluated with 1 results within limits (up to 50 best isotopic matches for each mass)

Elements Used:

C: 1-100 H: 0-100 N: 0-20 O: 0-20 P: 0-1

SYNAPT G2-SNUEB205

Y-SP18030601 9 (0.403) Cm (4.9)

ML VI 72i

06-Mar-2018

1: TOF MS ES+

1.54e+006

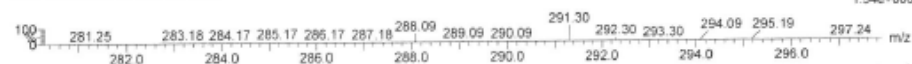

Minimum: -1.5  
Maximum: 50.0

| Mass     | Calc. Mass | mDa  | PPM  | DBE | i-FIT  | Norm | Conf(%) | Formula        |
|----------|------------|------|------|-----|--------|------|---------|----------------|
| 288.0861 | 288.0862   | -0.1 | -0.3 | 5.5 | 1706.2 | n/a  | n/a     | C9 H15 N5 O4 P |

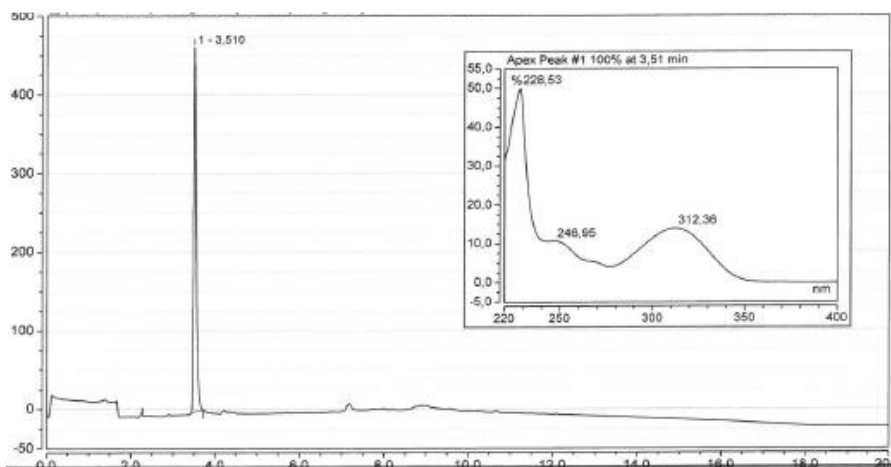

| Integration Results |           |                    |              |            |                 |                   |             |
|---------------------|-----------|--------------------|--------------|------------|-----------------|-------------------|-------------|
| No.                 | Peak Name | Retention Time min | Area mAU*min | Height mAU | Relative Area % | Relative Height % | Amount n.a. |
| 1                   |           | 3.510              | 32.385       | 463.771    | 100.00          | 100.00            | n.a.        |

(R)-(4-(6-amino-2-fluoro-9H-purin-9-yl)-2-hydroxybutyl) phosphonic acid (R)-10

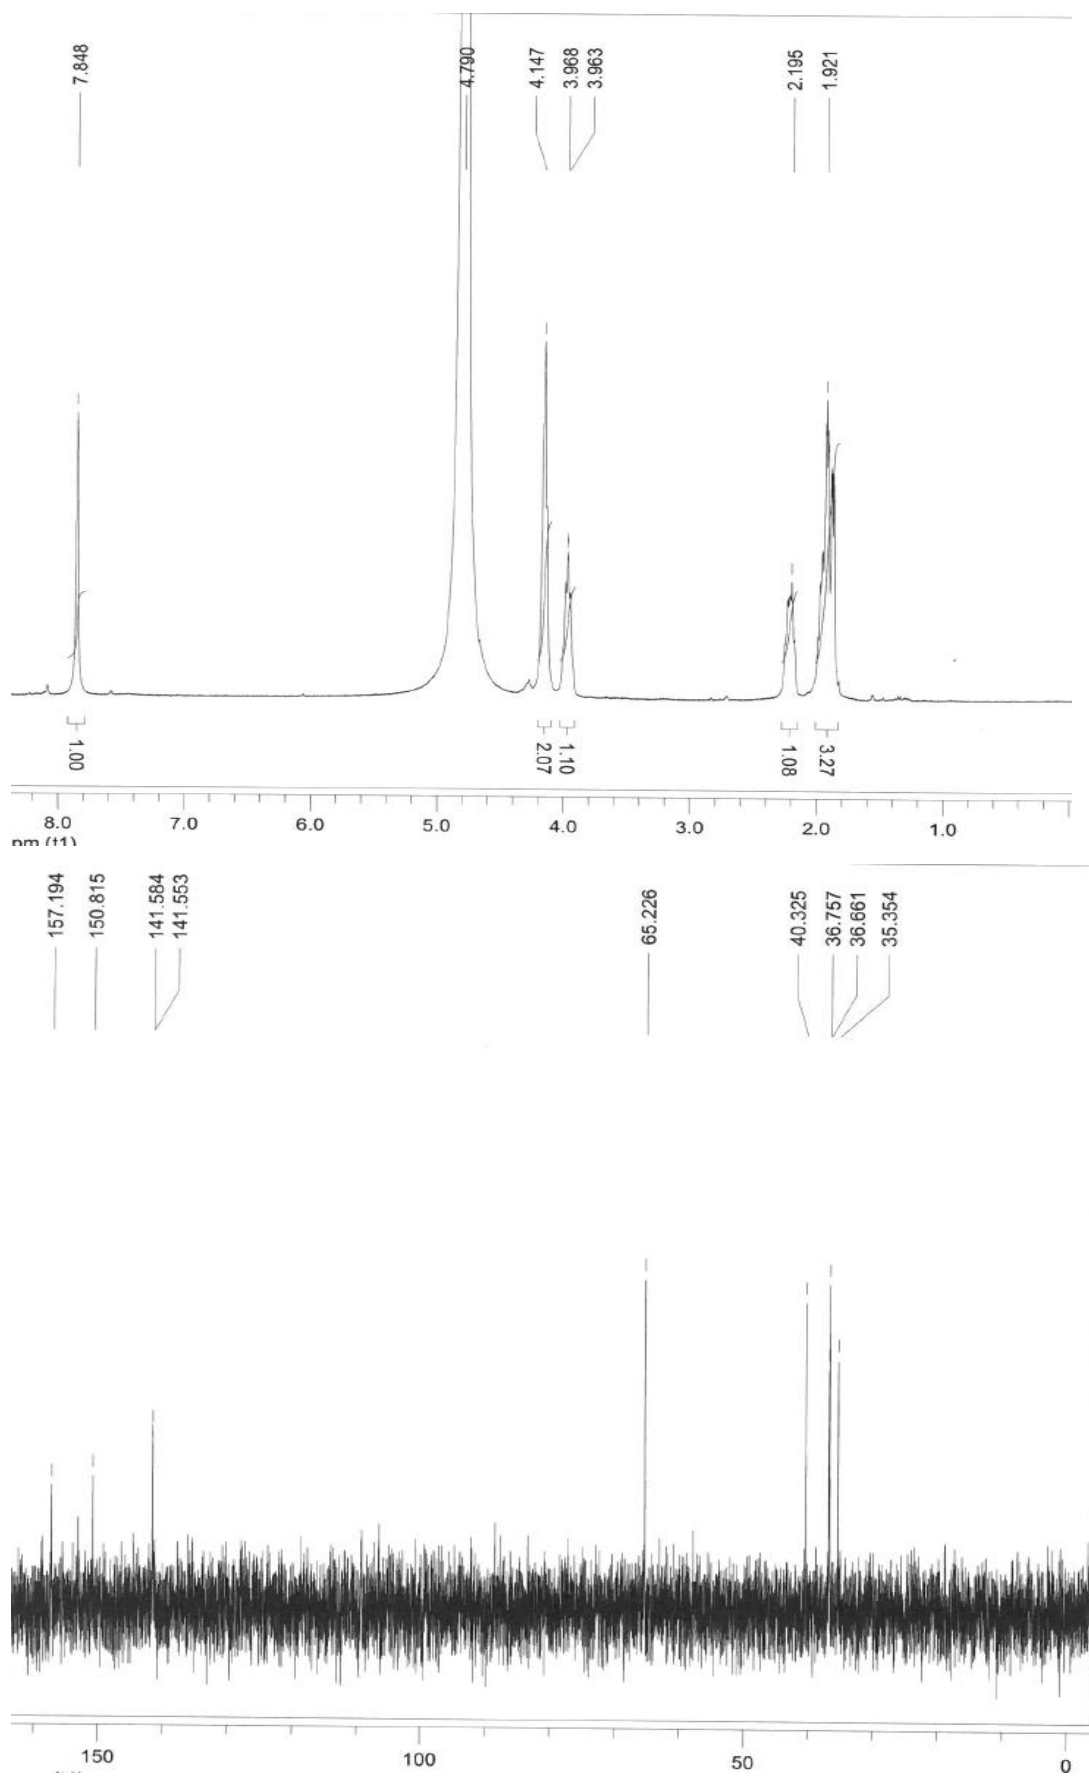



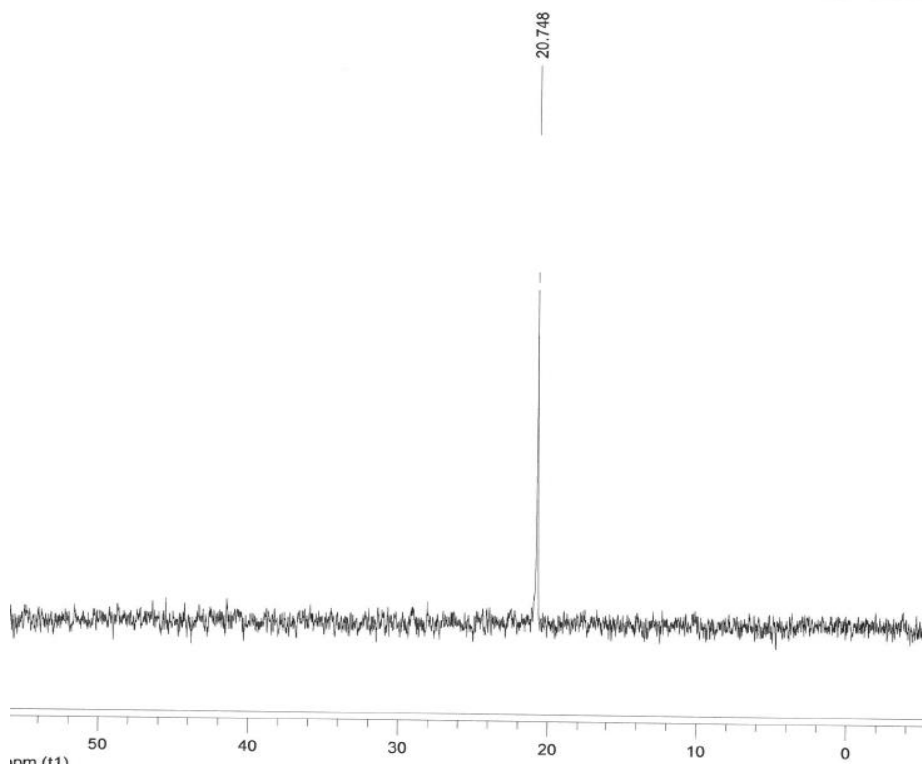

# Elemental Composition Report

Page 1

## Single Mass Analysis

Tolerance = 1.0 mDa / DBE: min = -1.5, max = 50.0

Element prediction: Off

Number of isotope peaks used for i-FIT = 3

Monoisotopic Mass, Even Electron Ions

1384 formula(e) evaluated with 5 results within limits (up to 50 best isotopic matches for each mass)

Elements Used:

C: 0-100 H: 0-100 N: 0-10 O: 0-10 F: 0-1 P: 0-1

SYNAPT G2-S#UEB205

Y-CP17100602 4 (0.175)

ML VI-61 i

1: TOF MS ES+

3.98e+006

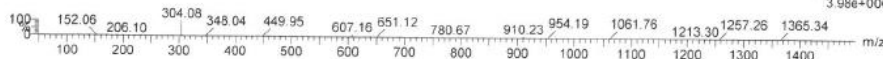

Minimum: -1.5  
Maximum: 50.0

| Mass     | Calc. Mass | mDa  | PPM  | DBE  | i-FIT  | Norm  | Conf(%) | Formula          |
|----------|------------|------|------|------|--------|-------|---------|------------------|
| 304.0815 | 304.0806   | 0.9  | 3.0  | 6.5  | 2217.8 | 0.947 | 38.79   | C8 H11 N7 O5 F   |
|          | 304.0822   | -0.7 | -2.3 | 1.5  | 2218.0 | 1.214 | 29.70   | C6 H16 N5 O6 F P |
|          | 304.0811   | 0.4  | 1.3  | 5.5  | 2218.1 | 1.298 | 27.30   | C9 H15 N5 O5 P   |
|          | 304.0824   | -0.9 | -3.0 | 10.5 | 2220.2 | 3.369 | 3.44    | C10 H11 N9 O P   |
|          | 304.0821   | -0.6 | -2.0 | 9.5  | 2221.7 | 4.866 | 0.77    | C15 H14 N O6     |

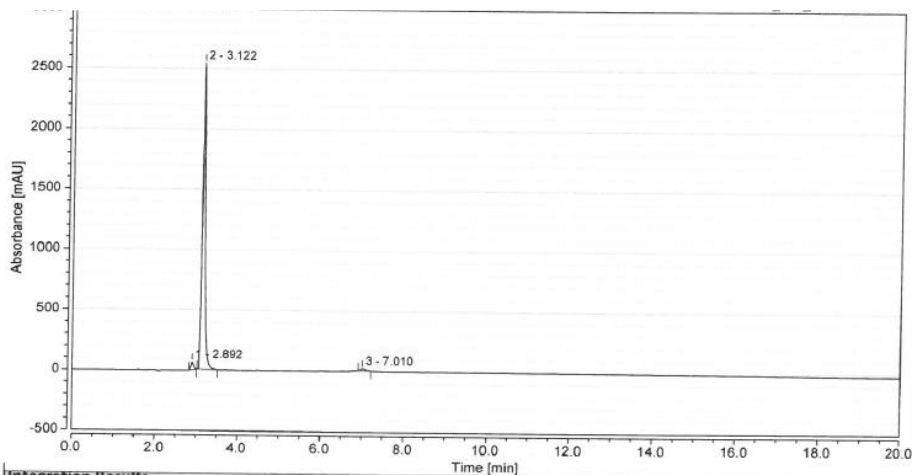

## Integration Results

| No. | Peak Name | Retention Time min | Area mAU*min | Height mAU | Relative Area % | Relative Height % | Amount |
|-----|-----------|--------------------|--------------|------------|-----------------|-------------------|--------|
| 1   |           | 2.892              | 5.043        | 65.479     | 2.63            | 2.50              | n.a.   |
| 2   |           | 3.122              | 184.044      | 2537.409   | 96.14           | 96.84             | n.a.   |
| 3   |           | 7.010              | 2.345        | 17.254     | 1.23            | 0.66              | n.a.   |

N-9-[4-phosphonic acid-butyl]guanine, 11a

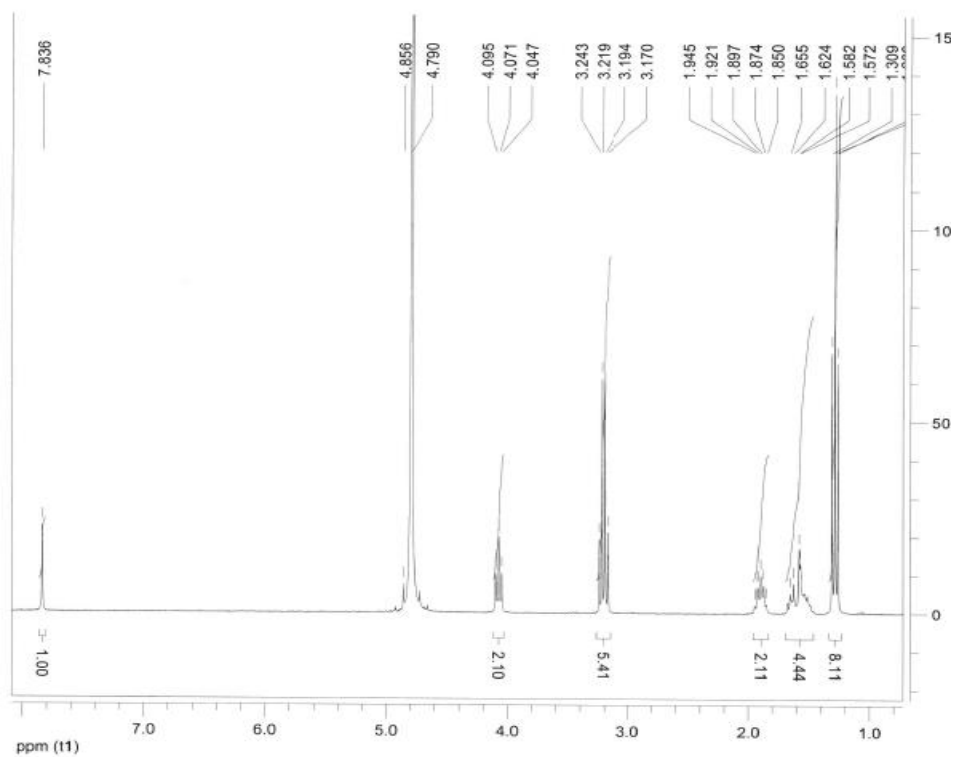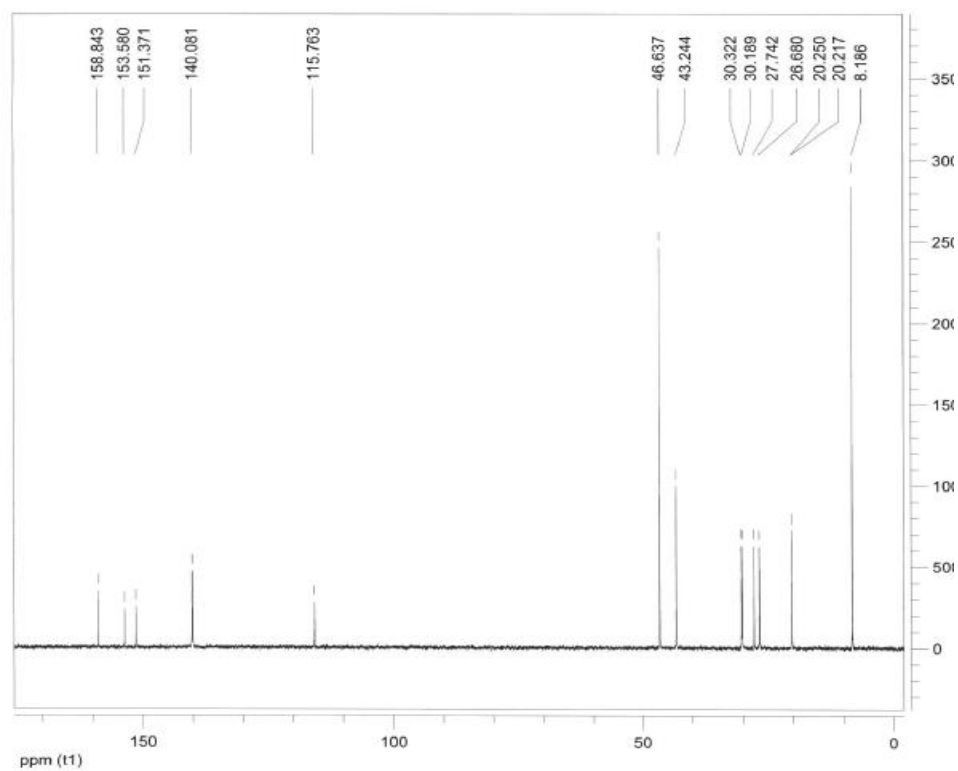

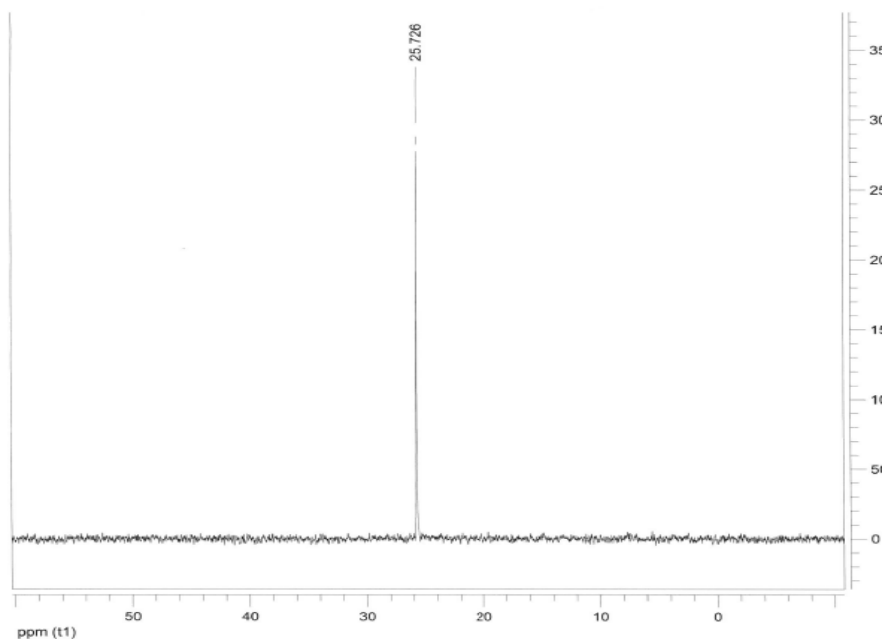

# Elemental Composition Report

Page 1

## Single Mass Analysis

Tolerance = 1.0 mDa / DBE: min = -10.0, max = 100.0

Element prediction: Off

Number of isotope peaks used for i-FIT = 3

Monoisotopic Mass, Even Electron Ions

1337 formula(e) evaluated with 2 results within limits (all results (up to 1000) for each mass)

Elements Used:

C: 0-100 H: 0-20 N: 0-20 O: 0-20 P: 0-1

SYNAPT G2-S#UEB205

MLA V-38b

06-Jun-2017

Y-JV17060601 3 (0.141) Cm (3)

1: TOF MS ES+

2.42e+006

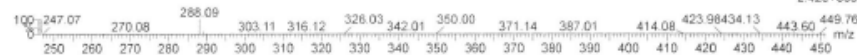

Minimum:

Maximum:

1.0 1.0

-10.0 100.0

Mass Calc. Mass mDa PPM DBE i-FIT Norm Conf(%) Formula

288.0864 288.0872 -0.8 -2.8 9.5 2110.7 0.000 99.99 C15 H14 N O5

288.0862 288.0862 0.2 0.7 5.5 2120.1 9.423 0.01 C9 H15 N5 O4 P

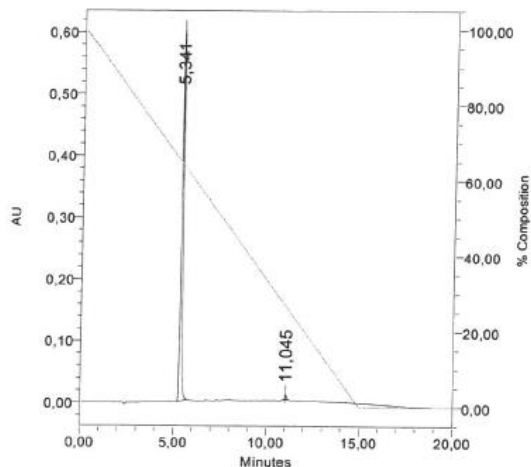

Acq Method Set grad 20mn T3

Processing Method grad 20mn T3

SampleName: ML V-38b

Lambda Extract Wvln Ch1

Injection Volume 50.00 ul

Vial 13

Run Time 20.0 Minutes

## Processed Results

| RT     | Area    | % Area | Height | % Height |
|--------|---------|--------|--------|----------|
| 1 5.3  | 3622707 | 98.3   | 601709 | 98.47    |
| 2 11.0 | 63879   | 1.7    | 9343   | 1.53     |

## Spectrum Index Plot

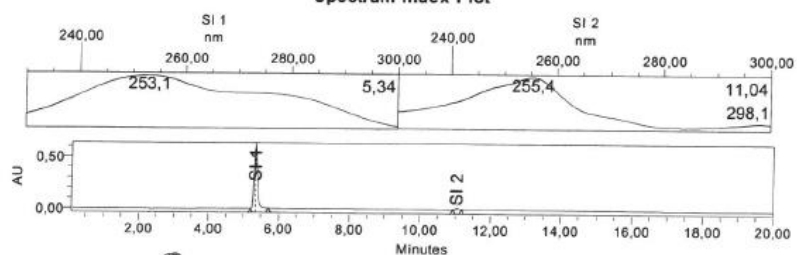

(Z)-(4-(2-amino-6-hydroxy-9H-purin-9-yl)-but-1-en-1-yl)phosphonic acid disodic salt 11b

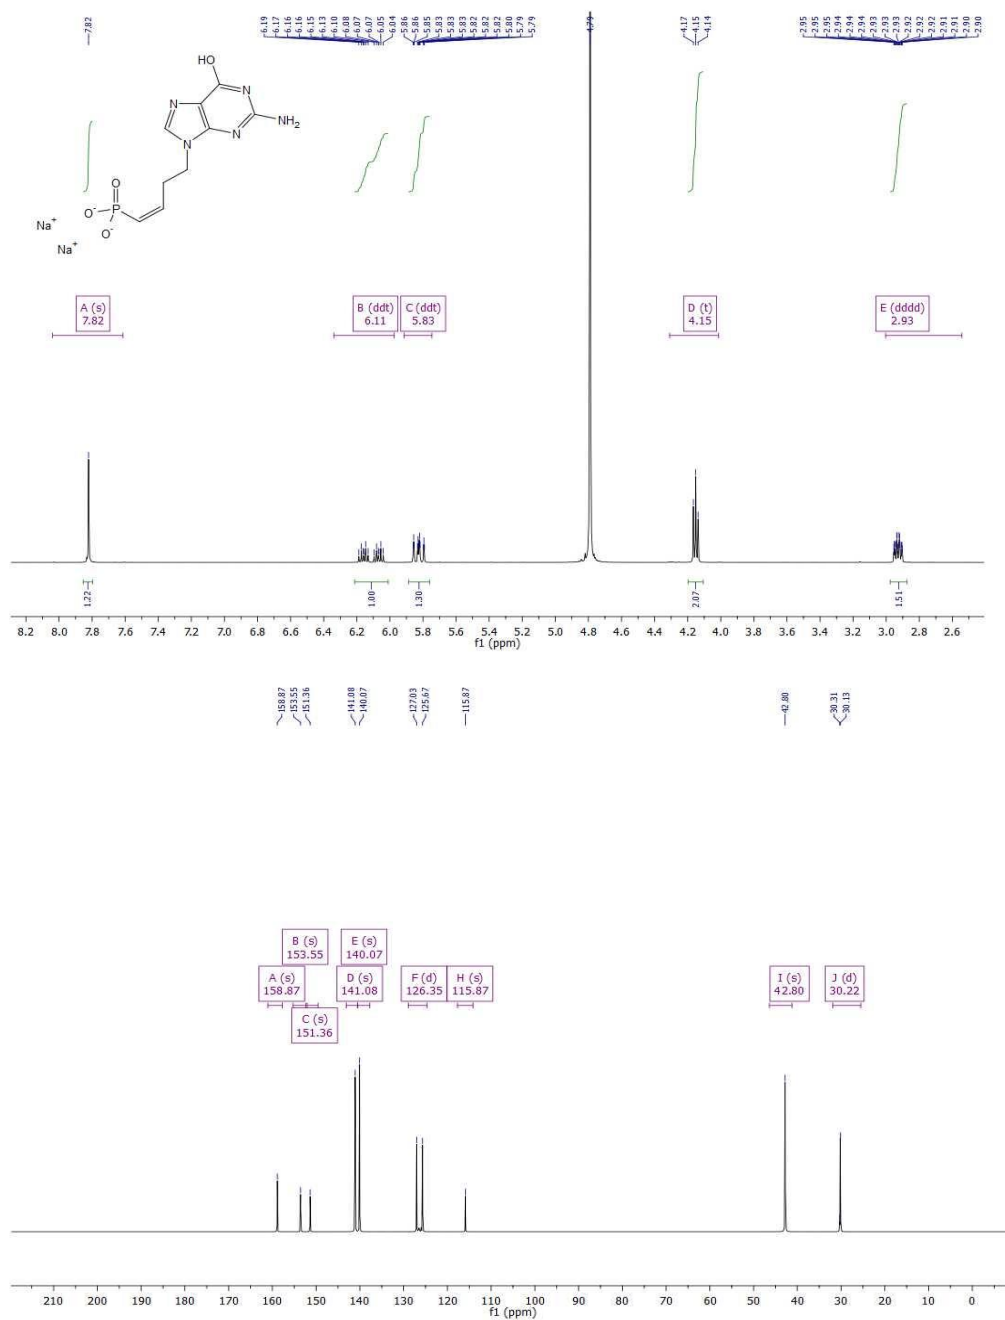

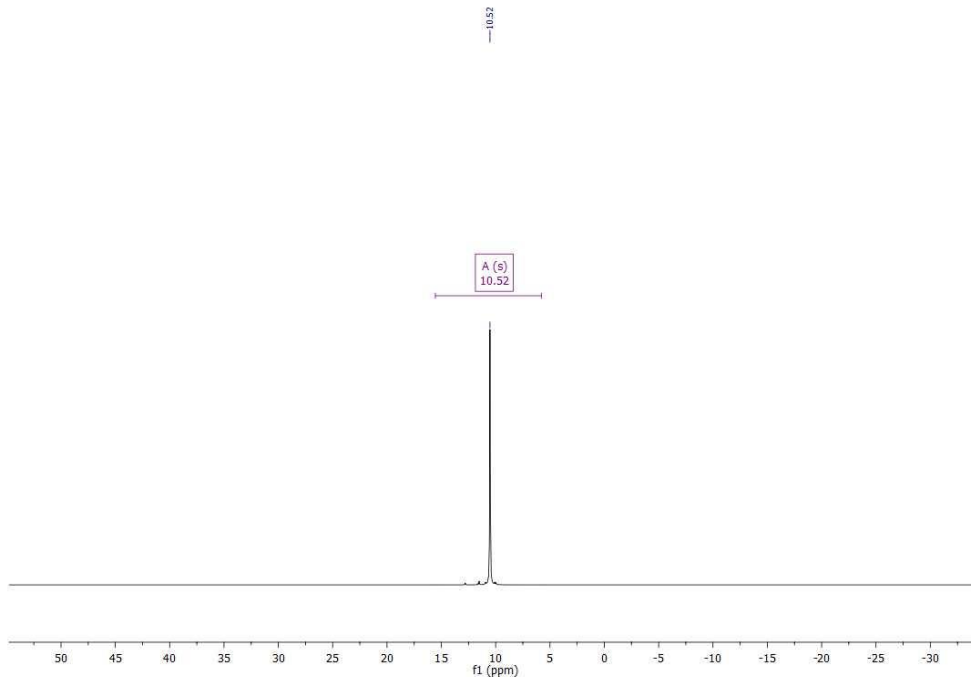

# Elemental Composition Report

Page 1

## Single Mass Analysis

Tolerance = 1.0 mDa / DBE: min = -1.5, max = 100.0  
 Element prediction: Off  
 Number of isotope peaks used for i-FIT = 3

Monoisotopic Mass, Even Electron Ions

322 formula(e) evaluated with 1 results within limits (up to 50 best isotopic matches for each mass)

Elements Used:

C: 0-100 H: 0-100 N: 0-10 O: 0-10 P: 1-1

SYNAPT G2-SHUEB205  
 Y-CP17120404 5 (0.228)

TC3-196-1F1

04-Dec-2017  
 1: TOF MS ES+  
 1.14e+005

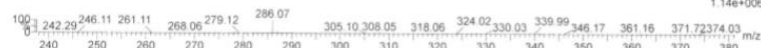

Minimum:

Maximum: 1.0 1.0 -1.5 100.0

| Mass     | Calc. Mass | mDa | PPM | DBE | i-FIT  | Norm | Conf (%) | Formula        |
|----------|------------|-----|-----|-----|--------|------|----------|----------------|
| 286.0708 | 286.0705   | 0.3 | 1.0 | 6.5 | 1906.8 | n/a  | n/a      | C9 H13 N5 O4 P |

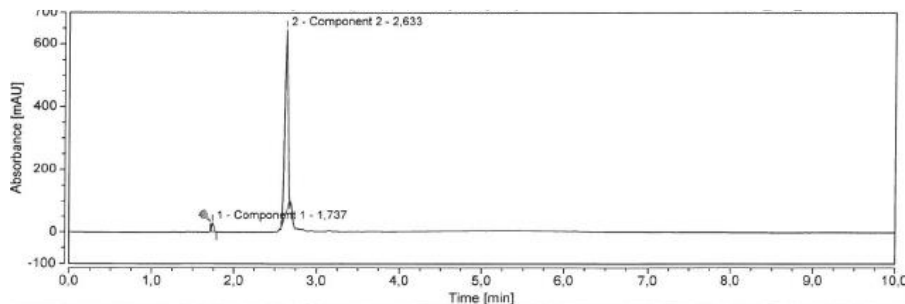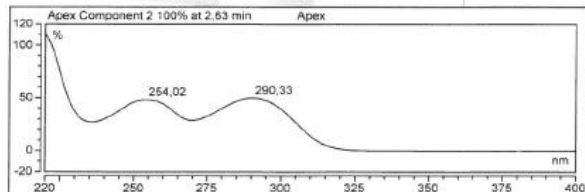

Spectral plot could not be created.  
 No spectra selected.

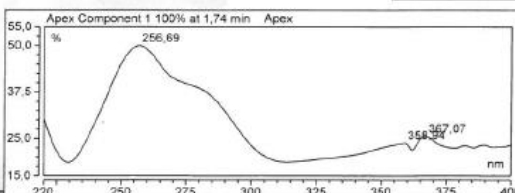

## Integration Results

| No. | Peak Name   | Retention Time<br>min | Area<br>mAU*min | Height<br>mAU | Relative Area<br>% | Relative Height<br>% | Amount |
|-----|-------------|-----------------------|-----------------|---------------|--------------------|----------------------|--------|
| 1   | Component 1 | 1.737                 | 0.893           | 29.374        | 3.30               | 4.79                 | n.a.   |
| 2   | Component 2 | 2.633                 | 26.178          | 583.221       | 96.70              | 95.21                | n.a.   |

(*R*)-(4-(2-amino-6-oxo-9*H*-purin-9-yl)-2-aminobutyl) phosphonic acid (*R*)-12

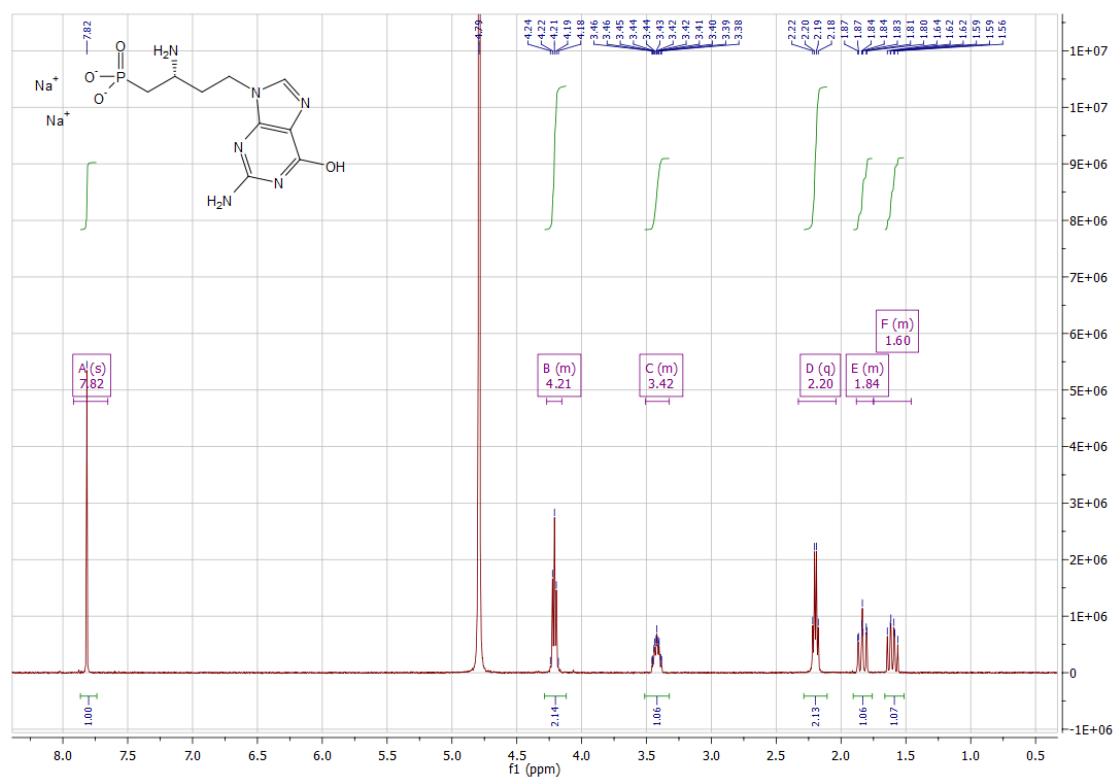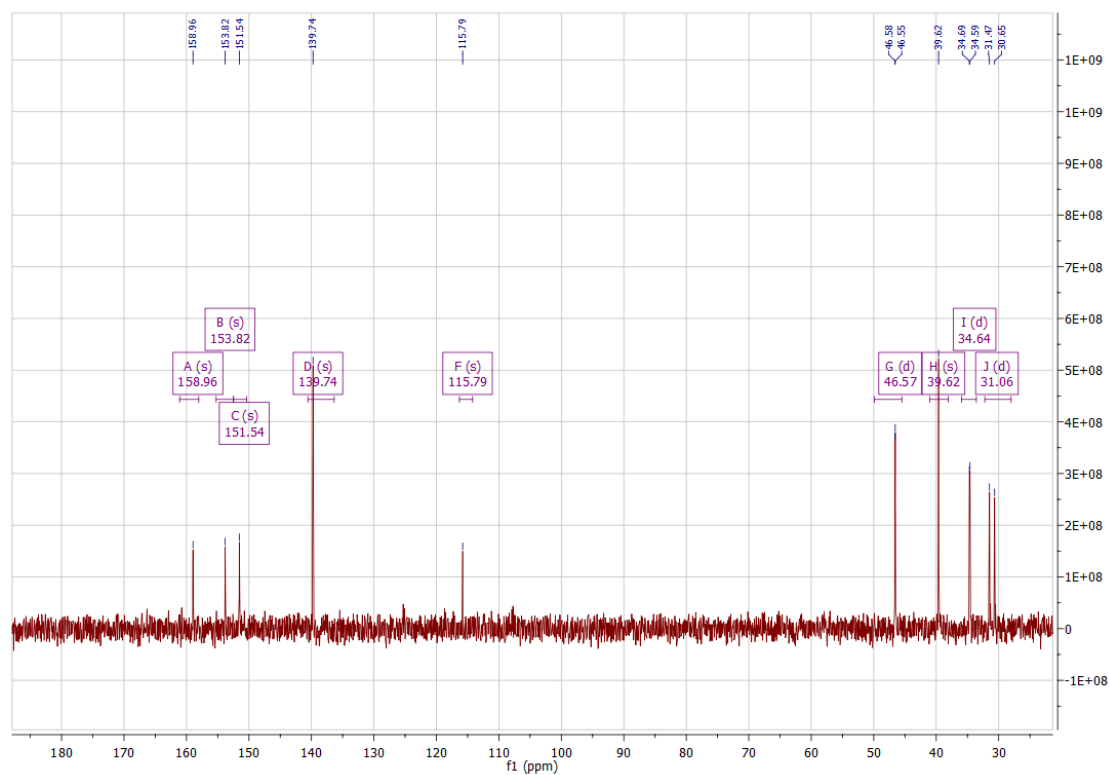

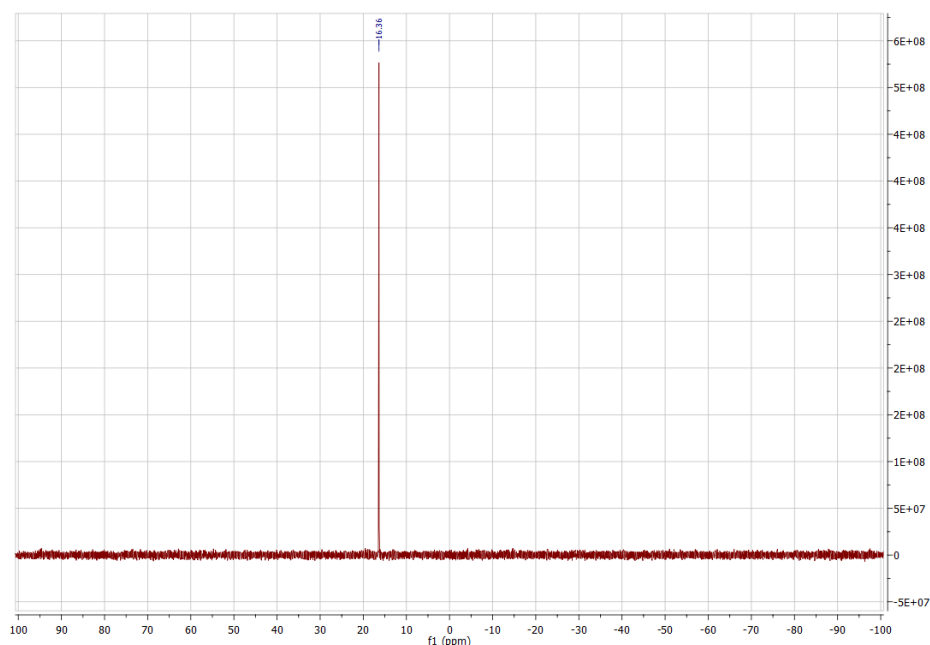

# Initial Composition Report

Page 1

## Single Mass Analysis

Tolerance = 1.5 mDa / DBE: min = -1.5, max = 100.0

Element prediction: Off

Number of isotope peaks used for i-FIT = 3

Monoisotopic Mass, Even Electron Ions

439 formula(e) evaluated with 3 results within limits (up to 50 best isotopic matches for each mass)

Elements Used:

C: 0-100 H: 0-100 N: 0-20 O: 0-20 P: 1-1 Na: 2-2

SYNAPT G2-S#UEB205

TC3-241

01-Feb-2018

1: TOF MS ES+

3.02e+006

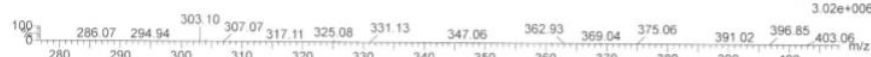

Minimum:

Maximum:

1.5 1.0 -1.5

100.0

| Mass     | Calc. Mass | mDa  | PPM  | DBE  | i-FIT  | Norm  | Conf(%) | Formula            |
|----------|------------|------|------|------|--------|-------|---------|--------------------|
| 347.0611 | 347.0610   | 0.1  | 0.3  | 5.5  | 1077.2 | 0.000 | 99.97   | C9 H14 N6 O4 P Na2 |
| 347.0596 | 347.0596   | 1.5  | 4.3  | 0.5  | 1085.5 | 8.303 | 0.02    | C8 H18 N2 O8 P Na2 |
| 347.0623 | 347.0623   | -1.2 | -3.5 | 10.5 | 1086.8 | 9.682 | 0.01    | C10 H10 N10 P Na2  |

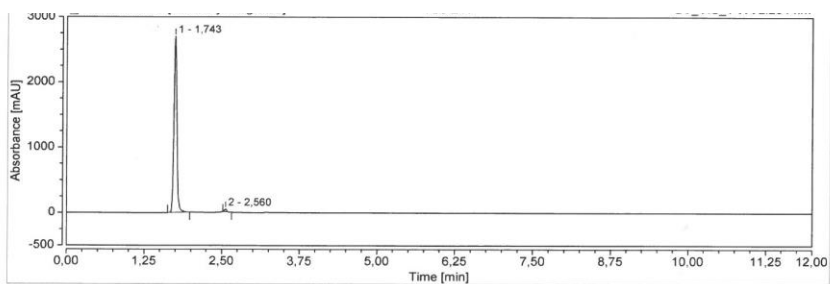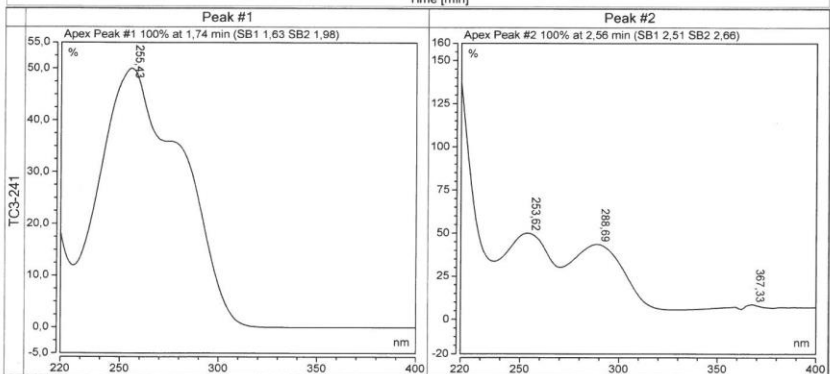

## Integration Results

| No. | Peak Name | Retention Time<br>min | Area<br>mAU*min | Height<br>mAU | Relative Area<br>% | Relative Height<br>% | Amount |
|-----|-----------|-----------------------|-----------------|---------------|--------------------|----------------------|--------|
| 1   |           | 1.743                 | 150,702         | 2700,527      | 98.87              | 98.37                | n.a.   |
| 2   |           | 2.560                 | 1,719           | 44,883        | 1.13               | 1.63                 | n.a.   |

(S)-(4-(2-amino-6-oxo-9H-purin-9-yl)-2-aminobutyl) phosphonic acid (S)-12

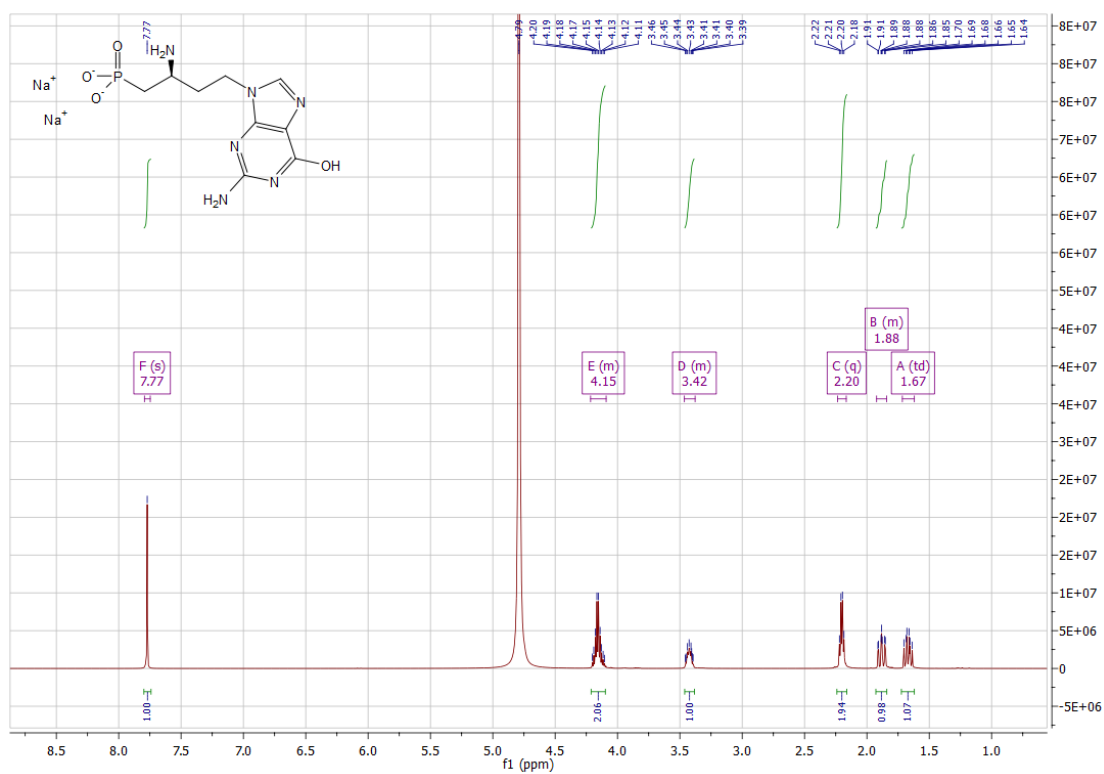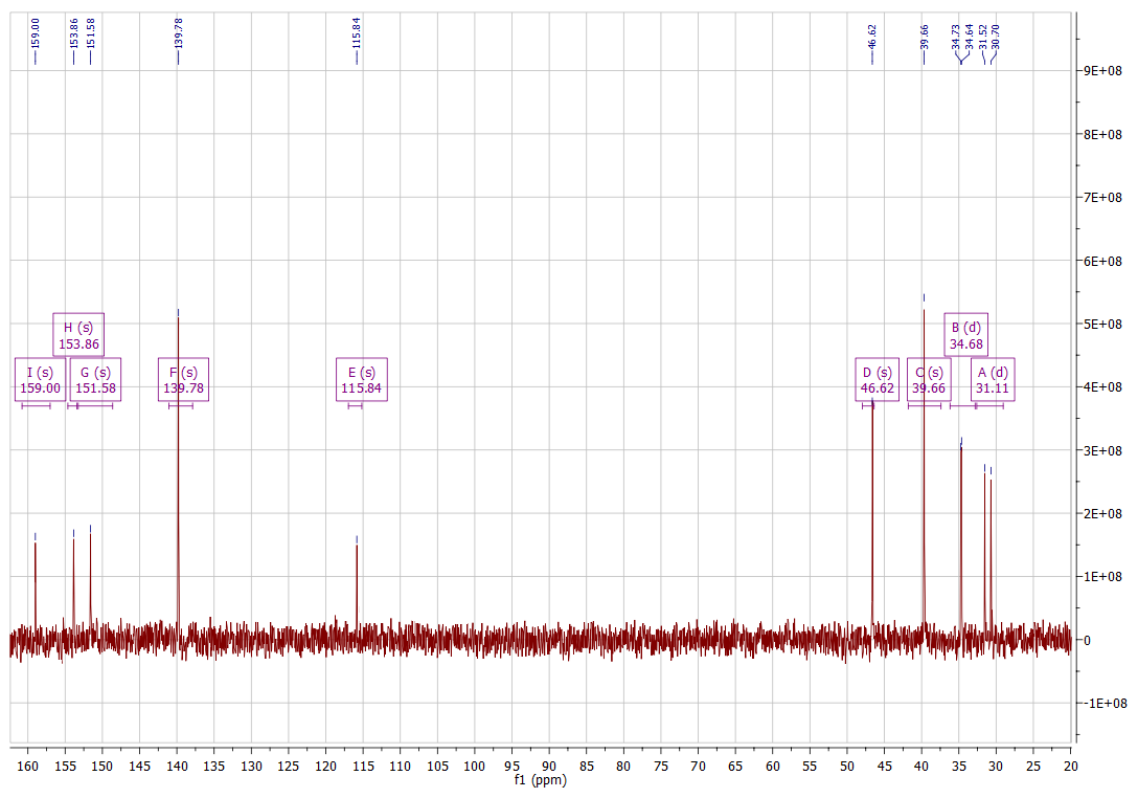



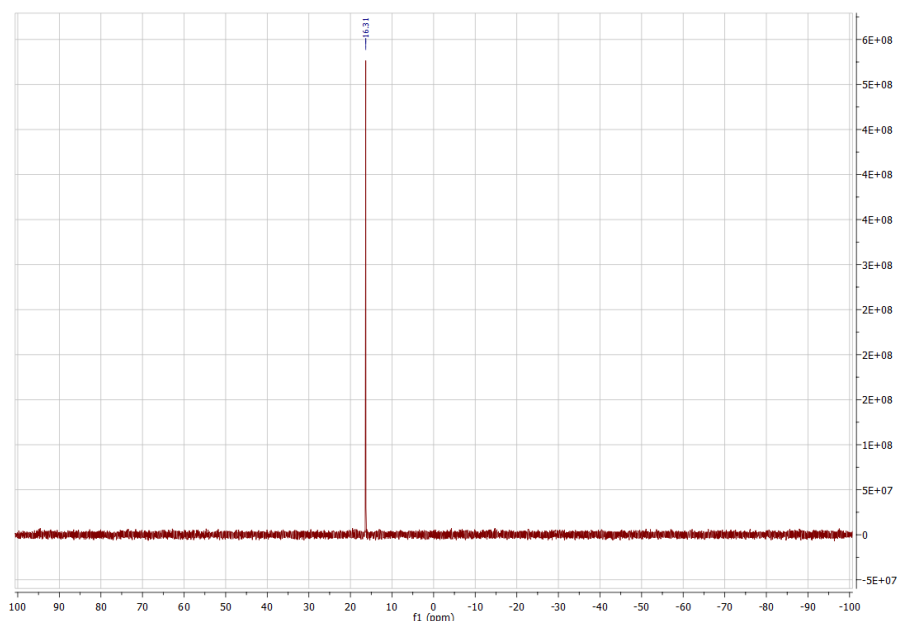

# Elemental Composition Report

Page 1

## Single Mass Analysis

Tolerance = 1.0 mDa / DBE: min = -1.5, max = 100.0

Element prediction: Off

Number of isotope peaks used for i-FIT = 3

Monoisotopic Mass, Even Electron Ions

1693 formula(e) evaluated with 6 results within limits (up to 50 best isotopic matches for each mass)

Elements Used:

C: 0-100 H: 0-100 N: 0-20 O: 0-20 Na: 0-2 P: 1-1

SYNAPT G2-S#UEB205

TC3-218

Y-NuEP18011702 11 (0.491) Cm (10:11)

17-Jan-2018

1: TOF MS ES+

1.03e+006

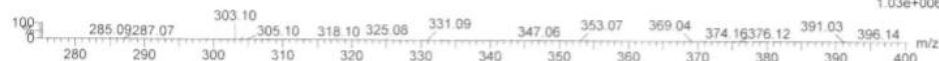

Minimum: -1.5  
Maximum: 100.0

| Mass     | Calc. Mass | mDa  | PPM  | DBE  | i-FIT | Norm   | Conf(%) | Formula            |
|----------|------------|------|------|------|-------|--------|---------|--------------------|
| 347.0605 | 347.0602   | 0.3  | 0.9  | 16.5 | 724.0 | 0.006  | 100.00  | C22 H13 O Na P     |
|          | 347.0610   | -0.5 | -1.4 | 5.5  | 735.2 | 11.164 | 0.00    | C9 H14 N6 O4 Na2 F |
|          | 347.0604   | 0.1  | 0.3  | 2.5  | 736.0 | 12.022 | 0.00    | C7 H16 N4 O10 P    |
|          | 347.0596   | 0.9  | 2.6  | 0.5  | 736.3 | 12.269 | 0.00    | C8 H18 N2 O8 Na2 F |
|          | 347.0607   | -0.2 | -0.6 | 9.5  | 737.8 | 13.922 | 0.00    | C7 H9 N12 O2 Na P  |
|          | 347.0604   | 0.1  | 0.3  | 13.5 | 740.4 | 16.413 | 0.00    | C5 H4 N18 P        |

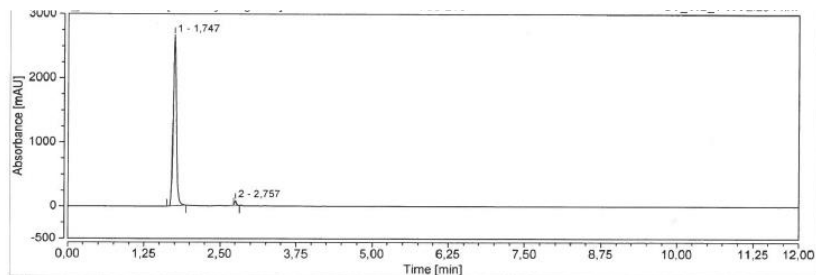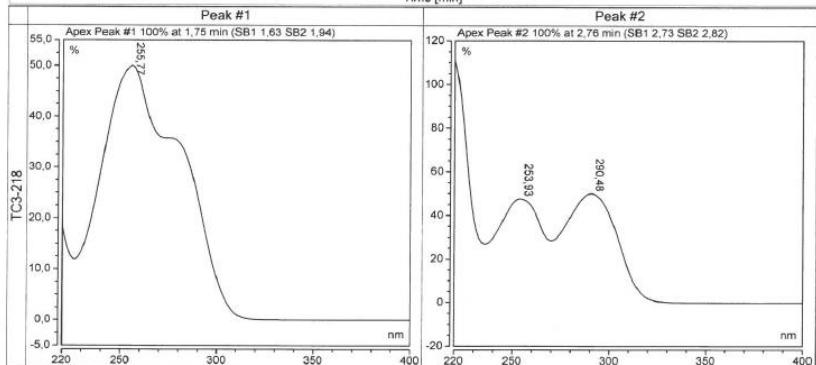

| No. | Peak Name | Retention Time min | Area mAU*min | Height mAU | Relative Area % | Relative Height % | Amount n.a. |
|-----|-----------|--------------------|--------------|------------|-----------------|-------------------|-------------|
| 1   |           | 1.747              | 161,910      | 2666,631   | 98.43           | 97.14             | n.a.        |
| 2   |           | 2.757              | 2,586        | 78,560     | 1.57            | 2.86              | n.a.        |

(*R*)-(4-(2,6-diamino-9*H*-purin-9-yl)-2-aminobutyl) phosphonic acid (*R*)-13

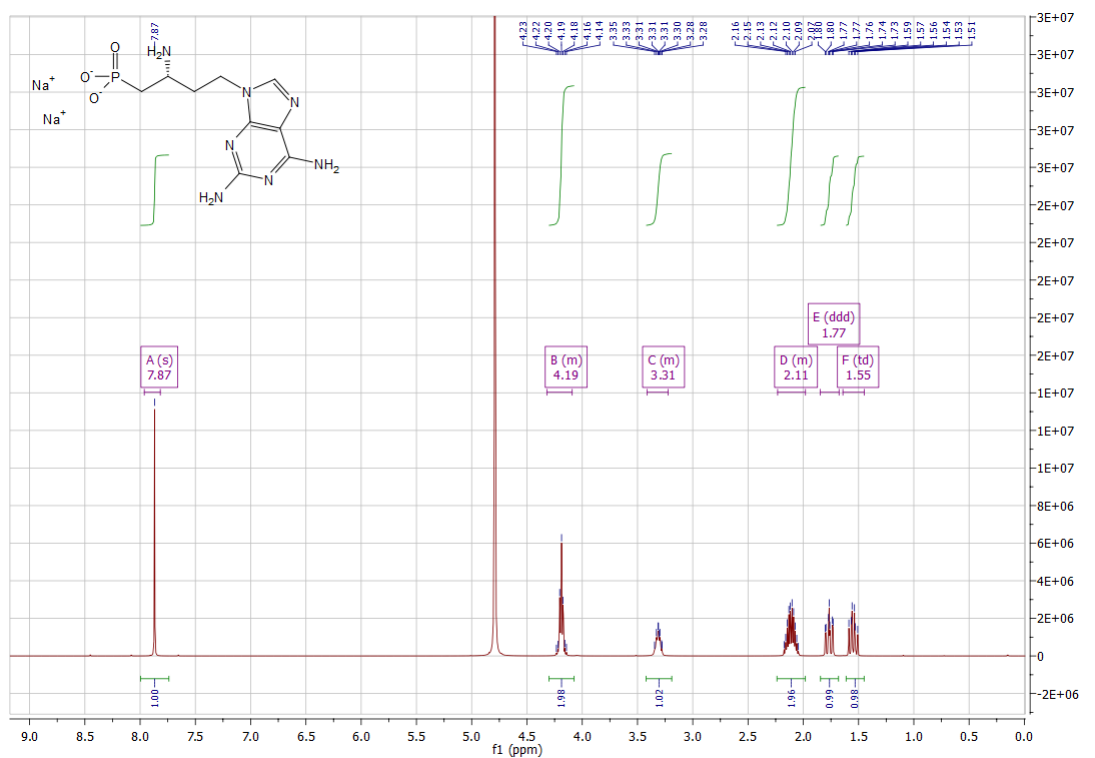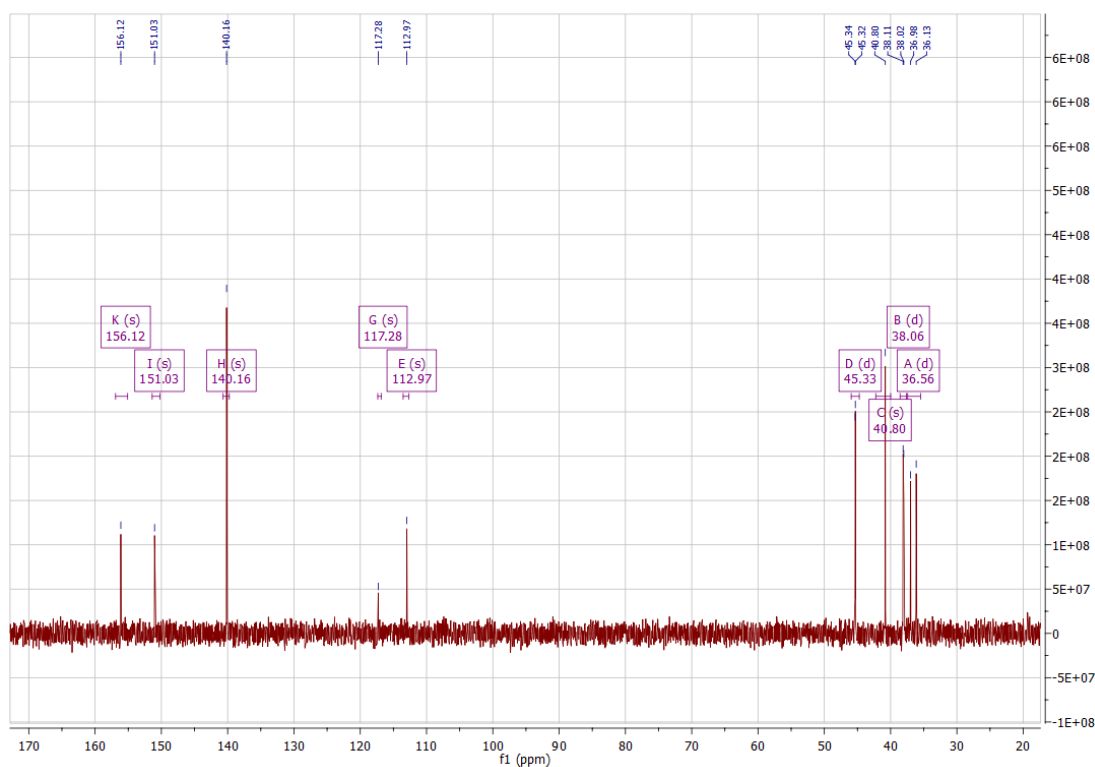

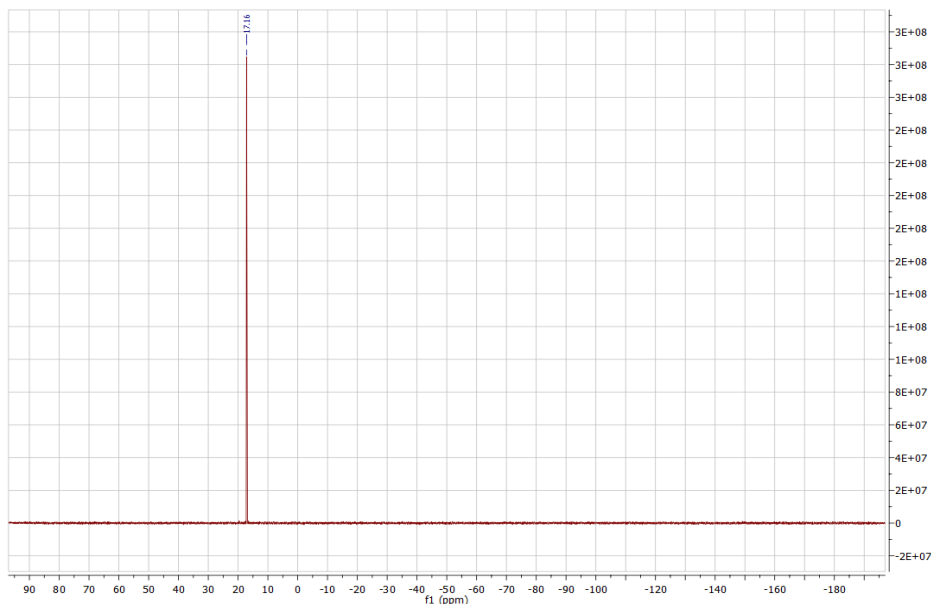

# Elemental Composition Report

Page 1

## Sample Mass Analysis

Mass tolerance = 1.5 mDa / DBE: min = -1.5, max = 100.0

Element prediction: Off

Number of isotope peaks used for i-FIT = 3

Monoisotopic Mass, Even Electron Ions

447 formula(e) evaluated with 2 results within limits (up to 50 best isotopic matches for each mass)

Elements Used:

C: 0-100 H: 0-100 N: 0-20 O: 0-20 P: 1-1 Na: 2-2

SYNAPT G2-S#UEB205

Y-NuEP18020106 5 (0.228) Cm (3.6)

TC3-240

01-Feb-2018

1: TOF MS ES+

3.01e+006

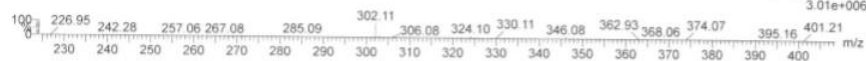

Minimum:

Maximum: 1.5 1.0 -1.5

Mass Calc. Mass mDa PPM DBE i-FIT Norm Conf(%) Formula

| Mass     | Calc. Mass | mDa | PPM | DBE | i-FIT  | Norm  | Conf(%) | Formula            |
|----------|------------|-----|-----|-----|--------|-------|---------|--------------------|
| 346.0770 | 346.0769   | 0.1 | 0.3 | 5.5 | 1104.8 | 0.001 | 99.94   | C9 H15 N7 O3 P Na2 |
|          | 346.0756   | 1.4 | 4.0 | 0.5 | 1112.3 | 7.484 | 0.06    | C8 H19 N3 O7 P Na2 |

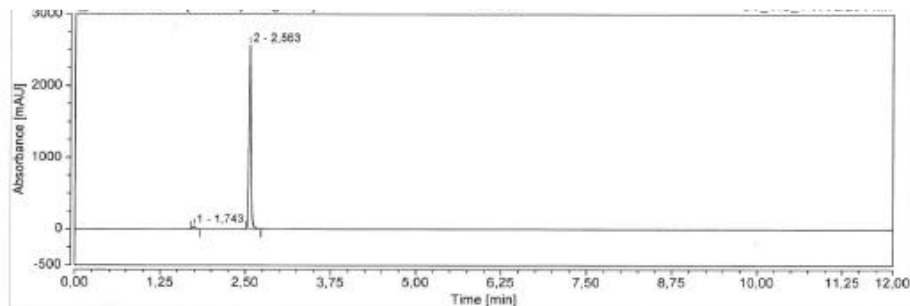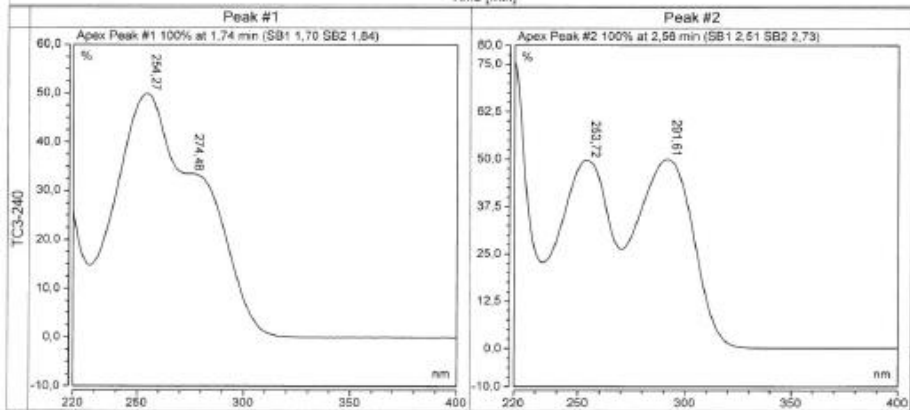

| No. | Peak Name | Retention Time min | Area mAU*min | Height mAU | Relative Area % | Relative Height % | Amount |
|-----|-----------|--------------------|--------------|------------|-----------------|-------------------|--------|
| 1   |           | 1.743              | 2,106        | 39,662     | 2.16            | 1.52              | n.s.   |
| 2   |           | 2.563              | 95,293       | 2563,936   | 97.84           | 98.48             | n.s.   |

(S)-(4-(2,6-diamino-9H-purin-9-yl)-2-aminobutyl) phosphonic acid (S)-13

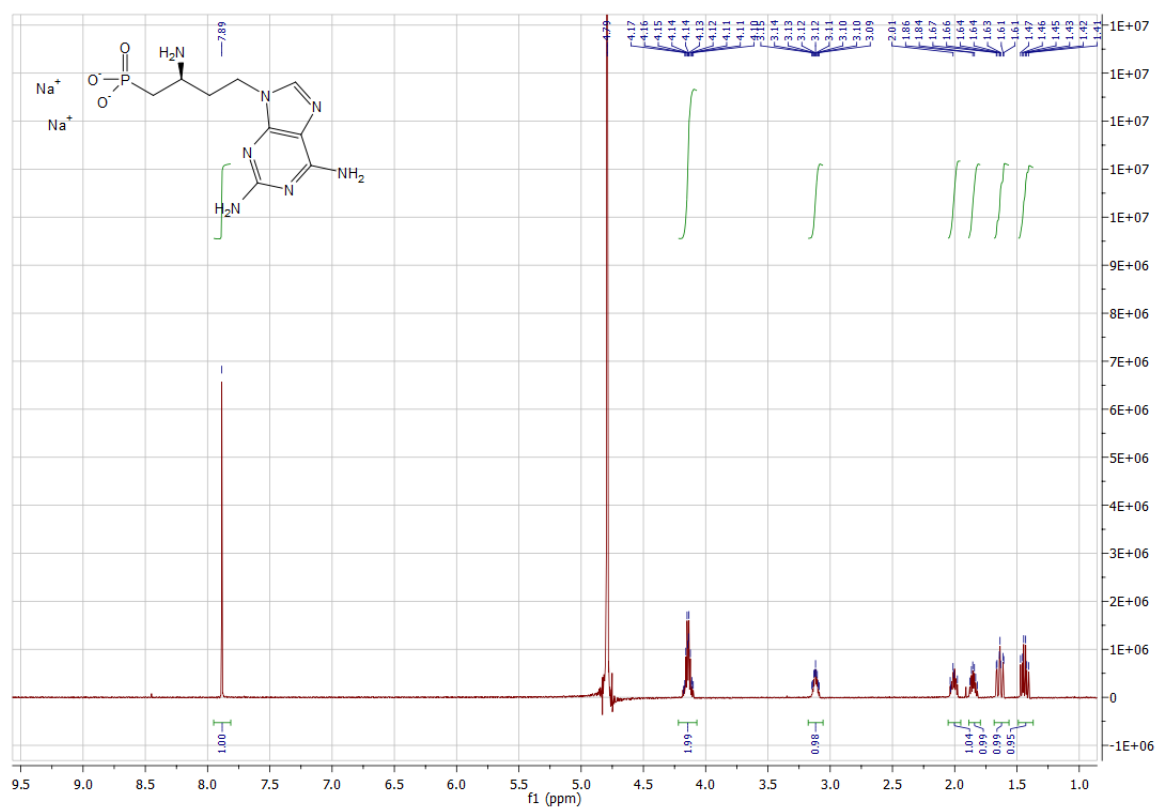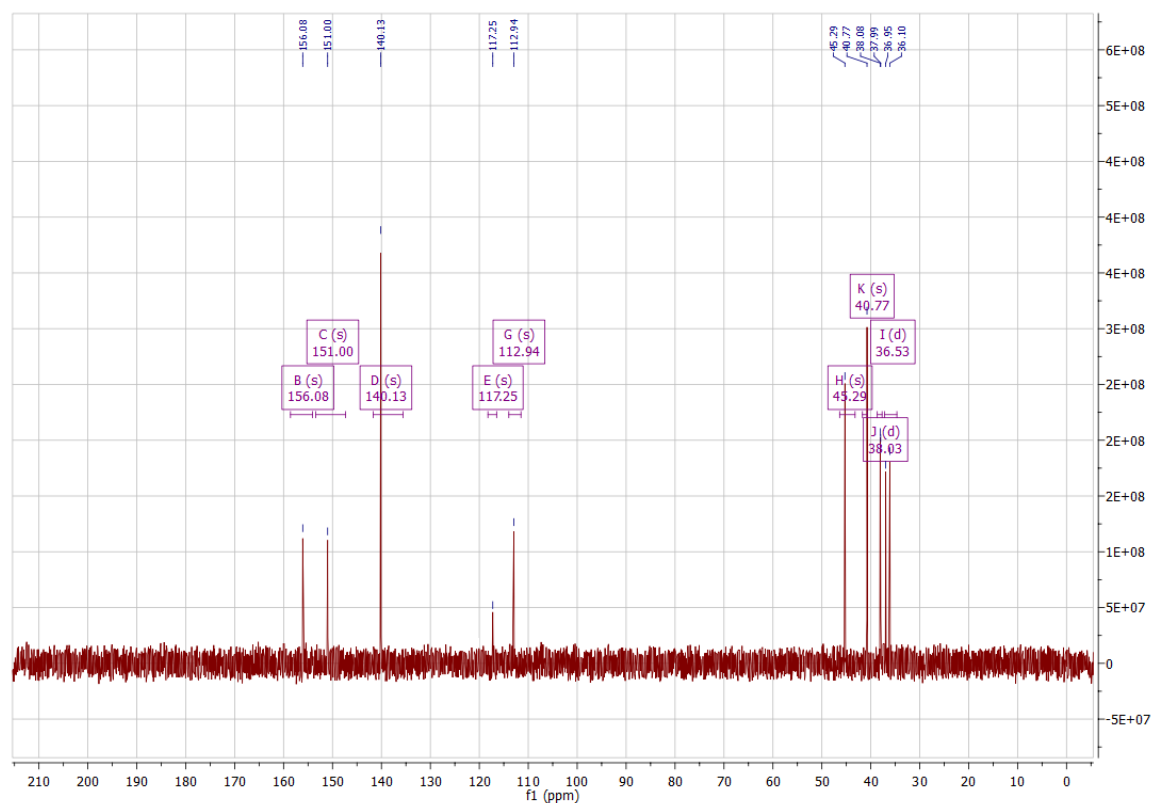

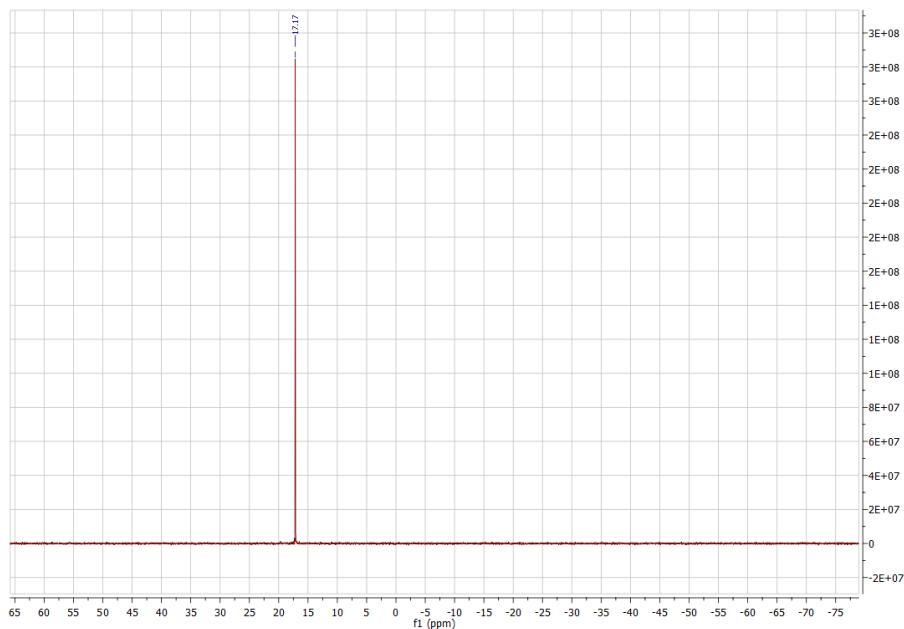

# ental Composition Report

Page 1

## ngle Mass Analysis

olerance = 1.5 mDa / DBE: min = -1.5, max = 100.0  
 Element prediction: Off  
 Number of isotope peaks used for i-FIT = 3

Monoisotopic Mass, Even Electron Ions

447 formula(e) evaluated with 2 results within limits (up to 50 best isotopic matches for each mass)

Elements Used:

C: 0-100 H: 0-100 N: 0-20 O: 0-20 P: 1-1 Na: 2-2

SYNAPT G2-S#UEB205

TC3-239

Y-NuEP18020109 5 (0.229) Cm (5)

01-Feb-2018

1: TOF MS ES+

6.80e+005

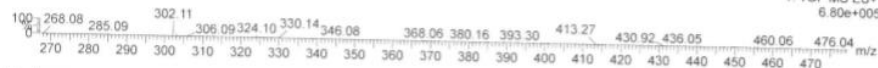

Minimum:

Maximum:

1.5

1.0

-1.5

100.0

Mass Calc. Mass mDa PPM DBE i-FIT Norm Conf(%) Formula

346.0769 346.0769 0.0 0.0 5.5 482.3 0.036 96.50 C9 H15 N7 O3 P Na2

346.0756 1.3 3.8 0.5 485.6 3.352 3.50 C8 H19 N3 O7 P Na2

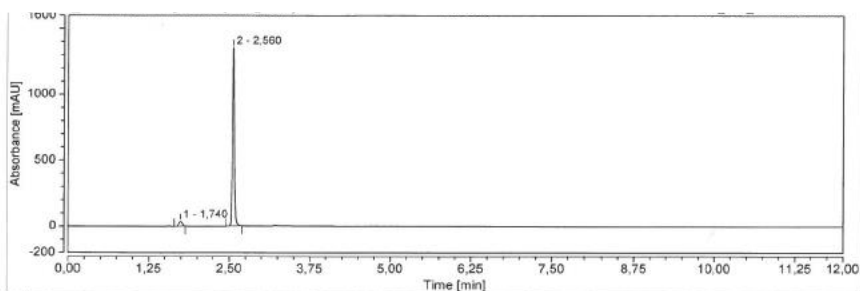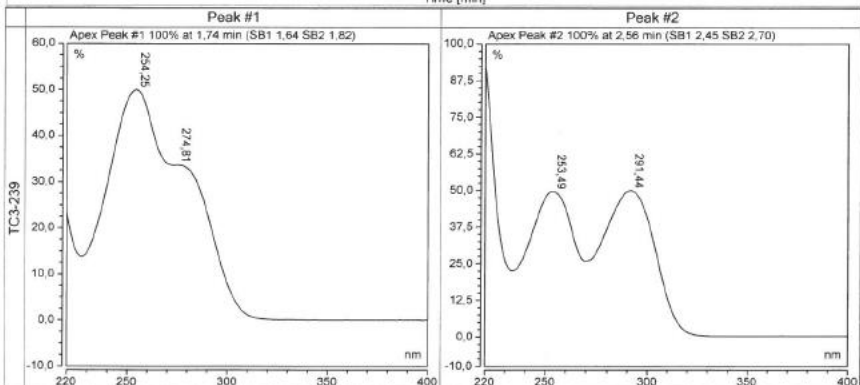

| Integration Results |           |                    |              |            |                 |                   |             |
|---------------------|-----------|--------------------|--------------|------------|-----------------|-------------------|-------------|
| No.                 | Peak Name | Retention Time min | Area mAU*min | Height mAU | Relative Area % | Relative Height % | Amount n.a. |
| 1                   |           | 1,740              | 1,980        | 36,495     | 3.84            | 2.62              | n.a.        |
| 2                   |           | 2,560              | 49,530       | 1355,695   | 96.16           | 97.38             | n.a.        |
